# Supplementary material for: One-pot, highly efficient, asymmetric synthesis of ring-fused piperidine derivatives bearing N,O- or N,N-acetal moieties
Source: Royal Society of Chemistry journal article supplement (doi:10.1039/c5ob02571k), 2016-01-01
Supplement: c5ob02571k1.pdf [file c5ob02571k1.pdf]

## **One-Pot, Highly Efficient, Asymmetric Synthesis of Ring-Fused Piperidine Derivatives Bearing N,O- or N,N-Acetal Moieties**

Ji-Yao Li,<sup>a</sup> Zhi-Long Li,<sup>b</sup> Wei-Wei Zhao,<sup>a</sup> Yan-Kai Liu,<sup>\*,a</sup> Zhi-Ping Tong,<sup>b</sup> and Rui Tan<sup>\*,b</sup>

<sup>a</sup> Key Laboratory of Marine Drugs, Chinese Ministry of Education, School of Medicine and Pharmacy, Ocean University of China, Qingdao 266003, P. R. China

<sup>b</sup> School of Life Science and Engineering, Southwest Jiaotong University, Chengdu, Sichuan 610031, P. R. China

# **Supporting Information**

---

## **Table of contents**

|                                                                                     |                 |
|-------------------------------------------------------------------------------------|-----------------|
| <b><i>1. Optimization of the Reaction Condition .....</i></b>                       | <b><i>3</i></b> |
| <b><i>2. Details of Reaction Conditions Study.....</i></b>                          | <b><i>4</i></b> |
| <b><i>3. Single Crystal X-Ray Diffraction Data for Compounds 5a and 8 .....</i></b> | <b><i>7</i></b> |
| <b><i>4. NMR spectra and HPLC Traces.....</i></b>                                   | <b><i>9</i></b> |

## 1. Optimization of the Reaction Condition

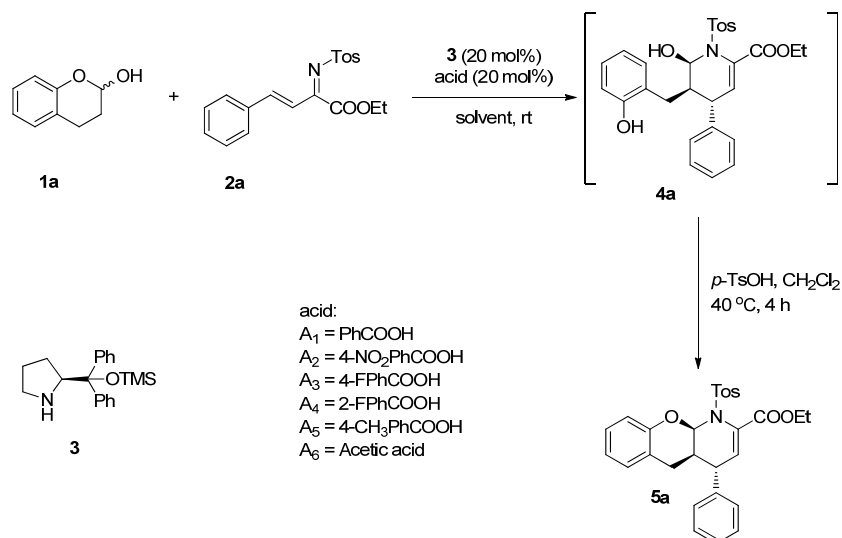

**Table 1. Conditions screening<sup>a</sup>**

| Entry           | Catalyst | Acid           | Solvent                             | Time <sup>b</sup> (h) | Yield <sup>c</sup> (%) | ee <sup>d</sup> (%) |
|-----------------|----------|----------------|-------------------------------------|-----------------------|------------------------|---------------------|
| 1               | 3        | A <sub>1</sub> | CH <sub>3</sub> CN                  | 12                    | 72.2                   | 99.2                |
| 2               | 3        | A <sub>2</sub> | CH <sub>3</sub> CN                  | 10                    | 77.2                   | 99.4                |
| 3               | 3        | A <sub>3</sub> | CH <sub>3</sub> CN                  | 12                    | 80.3                   | 99.1                |
| 4               | 3        | A <sub>4</sub> | CH <sub>3</sub> CN                  | 12                    | 76.8                   | 99.4                |
| 5               | 3        | A <sub>5</sub> | CH <sub>3</sub> CN                  | 12                    | 70                     | 99.3                |
| 6               | 3        | A <sub>6</sub> | CH <sub>3</sub> CN                  | 12                    | 80.9                   | 99.2                |
| 7 <sup>h</sup>  | 3        | A <sub>2</sub> | CH <sub>3</sub> CN/H <sub>2</sub> O | 12                    | 74.6                   | 98.8                |
| 8               | 3        | A <sub>2</sub> | Toluene                             | 36                    | 60.8                   | 99.5                |
| 9               | 3        | A <sub>2</sub> | CHCl <sub>3</sub>                   | >48                   | 48.9                   | 98.8                |
| 10              | 3        | A <sub>2</sub> | DMF                                 | 12                    | 76.4                   | 99.5                |
| 11 <sup>i</sup> | 3        | A <sub>2</sub> | DMF/ H <sub>2</sub> O               | 12                    | 77.3                   | 99.2                |
| 12 <sup>e</sup> | 3        | A <sub>2</sub> | CH <sub>3</sub> CN                  | 18                    | 65                     | 99.4                |
| 13 <sup>f</sup> | 3        | A <sub>2</sub> | CH <sub>3</sub> CN                  | 20                    | 60                     | 99.4                |
| 14 <sup>g</sup> | 3        | A <sub>2</sub> | CH <sub>3</sub> CN                  | 16                    | 85                     | 99.4                |
| 15 <sup>k</sup> | 3        | A <sub>2</sub> | CH <sub>3</sub> CN                  | 16                    | 76                     | 99.4                |

[a] Unless otherwise specified, all reactions were carried out using **1a** (0.12 mmol, 1.2 equiv) and N-Tos-1-aza-1,3-butadienes **2a** (0.10 mmol, 1.0 equiv) in solvent (500  $\mu$ L) with **3** (20 mol%) and acid (20 mol%) at 25 °C. After full conversion of the first step, the solvent was removed under vacuum and DCM (1.2 mL) and *p*-TsOH (5.0 equiv) were added to the reaction at 40 °C for 4 hours. When the reaction completed, the mixture was concentrated and the residue was purified by flash chromatography on silica gel to afford **5a**. The diastereoselectivity of **5a** is determined by <sup>1</sup>H NMR. [b] For the first step. [c] Isolated yields of product **5a**. [d] Determined by HPLC analysis over chiral stationary phases of **5a**. [e] 10 mol% **3** was used. [f] 5 mol% **3** was used. [g] **5a** was obtained in one-pot, reaction time refer to two steps. [h/i] 10% H<sub>2</sub>O was added. [k] After full conversion of the first step, the solvent was not removed and DCM (1.2 mL) and *p*-TsOH (5.0 equiv) were added to the reaction at 40 °C for 4 hours. Entry in online marks optimized conditions. *p*-TsOH = *p*-toluenesulfonic acid; TMS = trimethylsilyl; Tos = *p*-tolylsulfonyl.

## 2. Details of Reaction Conditions Study

**Table 2. Screening of solvents<sup>a</sup>**

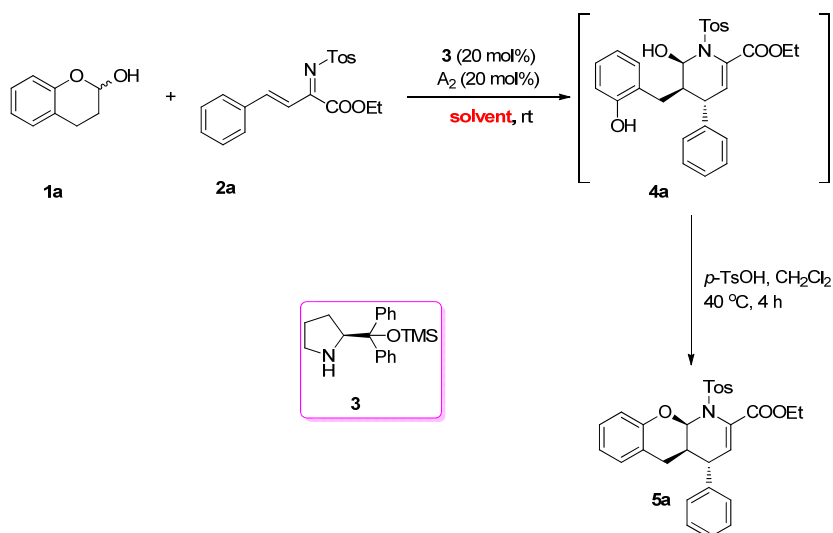

| Entry          | Solvent                             | Time (h) | Yield (%) <sup>b</sup> | 5a ee (%) <sup>c</sup> |
|----------------|-------------------------------------|----------|------------------------|------------------------|
| 1              | CH <sub>3</sub> CN                  | 10       | 77.2                   | 99.4                   |
| 2 <sup>d</sup> | CH <sub>3</sub> CN/H <sub>2</sub> O | 12       | 74.6                   | 98.8                   |
| 3              | Toluene                             | 36       | 60.8                   | 99.5                   |
| 4              | CHCl <sub>3</sub>                   | >48      | 48.9                   | 98.8                   |
| 5              | DMF                                 | 12       | 76.4                   | 99.5                   |
| 6 <sup>e</sup> | DMF/H <sub>2</sub> O                | 12       | 77.3                   | 99.2                   |

[a] Unless otherwise specified, all reactions were carried out using **1a** (0.12 mmol, 1.2 equiv) and N-Tos-1-aza-1,3-butadienes **2a** (0.10 mmol, 1.0 equiv) in solvent (500  $\mu$ L) with **3** (20 mol%) and  $A_2$  (20 mol%) at 25 °C. After full conversion of the first step, the solvent was removed under vacuum and DCM (1.2 mL) and  $p$ -TsOH (5.0 equiv) were added to the reaction at 40 °C for 4 hours. When the reaction completed, the mixture was concentrated and the residue was purified by flash chromatography on silica gel to afford **5a**. [b] Isolated yields of product **5a**. [c] Determined by HPLC analysis over chiral stationary phases of **5a**. [d/e] 10% H<sub>2</sub>O was added. Entry in online marks optimized conditions. DMF = Dimethylformamide;  $p$ -TsOH =  $p$ -toluenesulfonic acid; Tos =  $p$ -tolylsulfonyl.

**Table 3. Screening of acids<sup>a</sup>**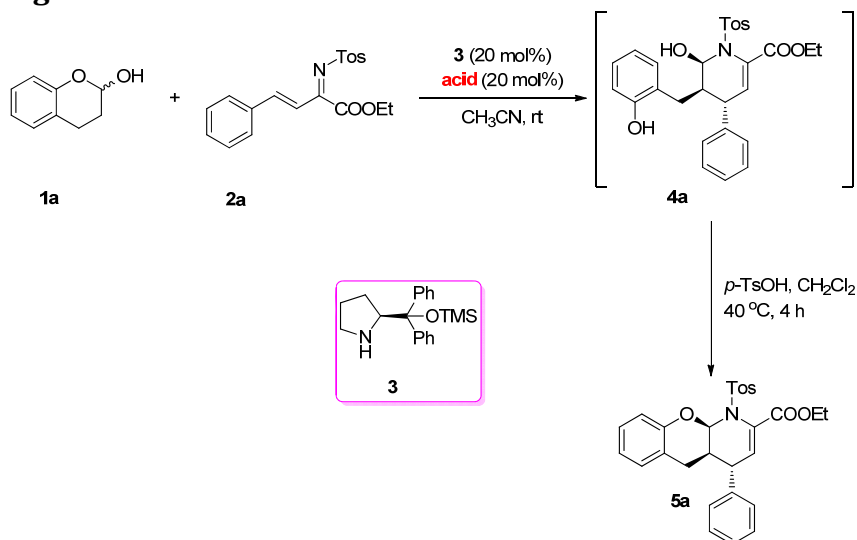

| Entry | Acid                     | Yield (%) <sup>b</sup> | <b>4a</b> ee (%) <sup>c</sup> |
|-------|--------------------------|------------------------|-------------------------------|
| 1     | PhCOOH                   | 72.2                   | 99.2                          |
| 2     | 4-NO <sub>2</sub> PhCOOH | 77.2                   | 99.4                          |
| 3     | 4-FPhCOOH                | 80.3                   | 99.1                          |
| 4     | 2-FPhCOOH                | 76.8                   | 99.4                          |
| 5     | 4-CH <sub>3</sub> PhCOOH | 70                     | 99.3                          |
| 6     | acetic Acid              | 80.9                   | 99.2                          |

[a] Unless otherwise specified, all reactions were carried out using **1a** (0.12 mmol, 1.2 equiv) and N-Tos-1-aza-1,3-butadienes **2a** (0.10 mmol, 1.0 equiv) in  $\text{CH}_3\text{CN}$  (500  $\mu\text{L}$ ) with **3** (20 mol%) and acid (20 mol%) at  $25^\circ\text{C}$ . After full conversion of the first step, the solvent was removed under vacuum and DCM (1.2 mL) and  $p\text{-TsOH}$  (5.0 equiv) were added to the reaction at  $40^\circ\text{C}$  for 4 hours. When the reaction completed, the mixture was concentrated and the residue was purified by flash chromatography on silica gel to afford **5a**. [b] Isolated yields of product **5a**. [c] Determined by HPLC analysis over chiral stationary phases of **5a**. Entry in online marks optimized conditions.  $p\text{-TsOH}$  =  $p$ -toluenesulfonic acid.

Table 4. Screening of catalyst<sup>a</sup>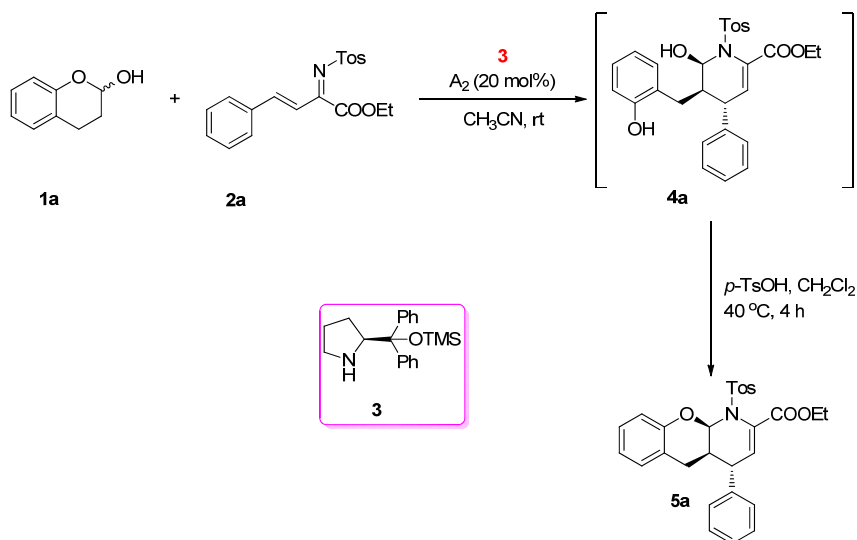

| Entry | Catalyst | Time (h) | Yield (%) <sup>b</sup> | 5a ee (%) <sup>c</sup> |
|-------|----------|----------|------------------------|------------------------|
| 1     | 5 mol %  | 20       | 60                     | 99.4                   |
| 2     | 10 mol % | 18       | 65                     | 99.4                   |
| 3     | 20 mol % | 10       | 77.2                   | 99.4                   |

[a] Unless otherwise specified, all reactions were carried out using **1a** (0.12 mmol, 1.2 equiv) and N-Tos-1-aza-1,3-butadienes **2a** (0.10 mmol, 1.0 equiv) in  $CH_3CN$  (500  $\mu$ L) with **3** (mol%) and  $A_2$  (20 mol%) at 25 °C. After full conversion of the first step, the solvent was removed under vacuum and DCM (1.2 mL) and  $p$ -TsOH (5.0 equiv) were added to the reaction at 40 °C for 4 hours. When the reaction completed, the mixture was concentrated and the residue was purified by flash chromatography on silica gel to afford **5a**. [b] Isolated yields of product **5a**. [c] Determined by HPLC analysis over chiral stationary phases of **5a**. Entry in online marks optimized conditions.  $p$ -TsOH =  $p$ -toluenesulfonic acid.

### 3. Single Crystal X-Ray Diffraction Data for Compounds 5a and 7

[CCDC 1429399 (**5a**) and CCDC 1432291 (**8**) contain the supplementary crystallographic data for this paper. These data can be obtained free of charge from The Cambridge Crystallographic Data Centre via [www.ccdc.cam.ac.uk/data\\_request/cif](http://www.ccdc.cam.ac.uk/data_request/cif).]

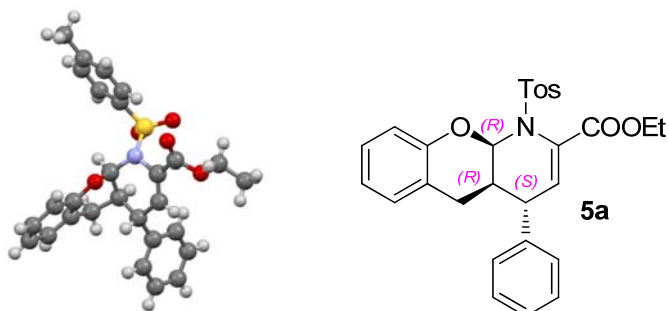

|                                                                         |                                                    |                                                    |
|-------------------------------------------------------------------------|----------------------------------------------------|----------------------------------------------------|
| Bond precision:                                                         | C-C = 0.0061 Å                                     | Wavelength=1.54184                                 |
| Cell:                                                                   | a=9.9601(8)                                        | b=10.8355(7)                                       |
|                                                                         | alpha=90                                           | beta=90                                            |
| Temperature: 293 K                                                      |                                                    | c=23.6278(13)                                      |
|                                                                         |                                                    | gamma=90                                           |
|                                                                         | Calculated                                         | Reported                                           |
| Volume                                                                  | 2550.0(3)                                          | 2550.0(3)                                          |
| Space group                                                             | P 21 21 21                                         | P212121                                            |
| Hall group                                                              | P 2ac 2ab                                          | ?                                                  |
| Moiety formula                                                          | C <sub>28</sub> H <sub>27</sub> N O <sub>5</sub> S | ?                                                  |
| Sum formula                                                             | C <sub>28</sub> H <sub>27</sub> N O <sub>5</sub> S | C <sub>28</sub> H <sub>27</sub> N O <sub>5</sub> S |
| Mr                                                                      | 489.57                                             | 489.57                                             |
| Dx, g cm <sup>-3</sup>                                                  | 1.275                                              | 1.275                                              |
| Z                                                                       | 4                                                  | 4                                                  |
| Mu (mm <sup>-1</sup> )                                                  | 1.443                                              | 1.443                                              |
| F000                                                                    | 1032.0                                             | 1032.0                                             |
| F000'                                                                   | 1036.35                                            |                                                    |
| h,k,lmax                                                                | 11,12,28                                           | 11,12,28                                           |
| Nref                                                                    | 4562[ 2601]                                        | 3770                                               |
| Tmin,Tmax                                                               | 0.891,0.904                                        | 0.893,0.906                                        |
| Tmin'                                                                   | 0.891                                              |                                                    |
| Correction method= # Reported T Limits: Tmin=0.893 Tmax=0.906 AbsCorr = |                                                    |                                                    |
| MULTI-SCAN                                                              |                                                    |                                                    |
| Data completeness= 1.45/0.83                                            | Theta(max)= 67.250                                 |                                                    |
| R(reflections)= 0.0479( 3120)                                           | wR2(reflections)= 0.1383( 3770)                    |                                                    |
| S = 1.071                                                               | Npar= 319                                          |                                                    |

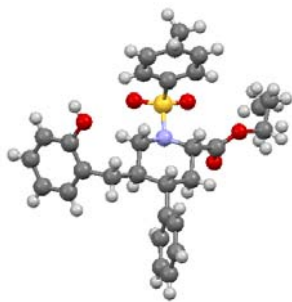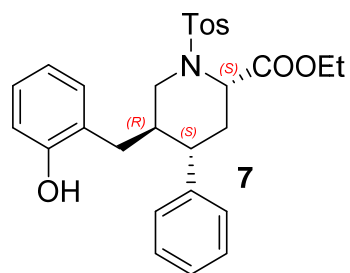

|                               |                |                |                                 |                    |  |
|-------------------------------|----------------|----------------|---------------------------------|--------------------|--|
| Bond precision:               |                | C-C = 0.0033 Å |                                 | Wavelength=0.71073 |  |
| Cell:                         | a=10.0985(8)   | b=14.8716(11)  | c=17.4835(13)                   |                    |  |
|                               | alpha=90       | beta=90        | gamma=90                        |                    |  |
| Temperature: 293 K            |                |                |                                 |                    |  |
|                               | Calculated     |                |                                 | Reported           |  |
| Volume                        | 2625.7(3)      |                |                                 | 2625.7(3)          |  |
| Space group                   | P 21 21 21     |                |                                 | P 21 21 21         |  |
| Hall group                    | P 2ac 2ab      |                |                                 | P 2ac 2ab          |  |
| Moiety formula                | C28 H31 N O5 S |                |                                 | C28 H31 N O5 S     |  |
| Sum formula                   | C28 H31 N O5 S |                |                                 | C28 H31 N O5 S     |  |
| Mr                            | 493.60         |                |                                 | 493.60             |  |
| Dx,g cm-3                     | 1.249          |                |                                 | 1.249              |  |
| Z                             | 4              |                |                                 | 4                  |  |
| Mu (mm-1)                     | 0.161          |                |                                 | 0.161              |  |
| F000                          | 1048.0         |                |                                 | 1048.0             |  |
| F000'                         | 1048.97        |                |                                 |                    |  |
| h,k,lmax                      | 12,17,20       |                |                                 | 12,17,20           |  |
| Nref                          | 4625[ 2625]    |                |                                 | 4623               |  |
| Tmin,Tmax                     |                |                |                                 |                    |  |
| Tmin'                         |                |                |                                 |                    |  |
| Correction method= Not given  |                |                |                                 |                    |  |
| Data completeness= 1.76/1.00  |                |                | Theta(max)= 25.010              |                    |  |
| R(reflections)= 0.0333( 4325) |                |                | wR2(reflections)= 0.0930( 4623) |                    |  |
| S = 1.043                     |                | Npar= 324      |                                 |                    |  |

## 4. NMR spectra and HPLC Traces

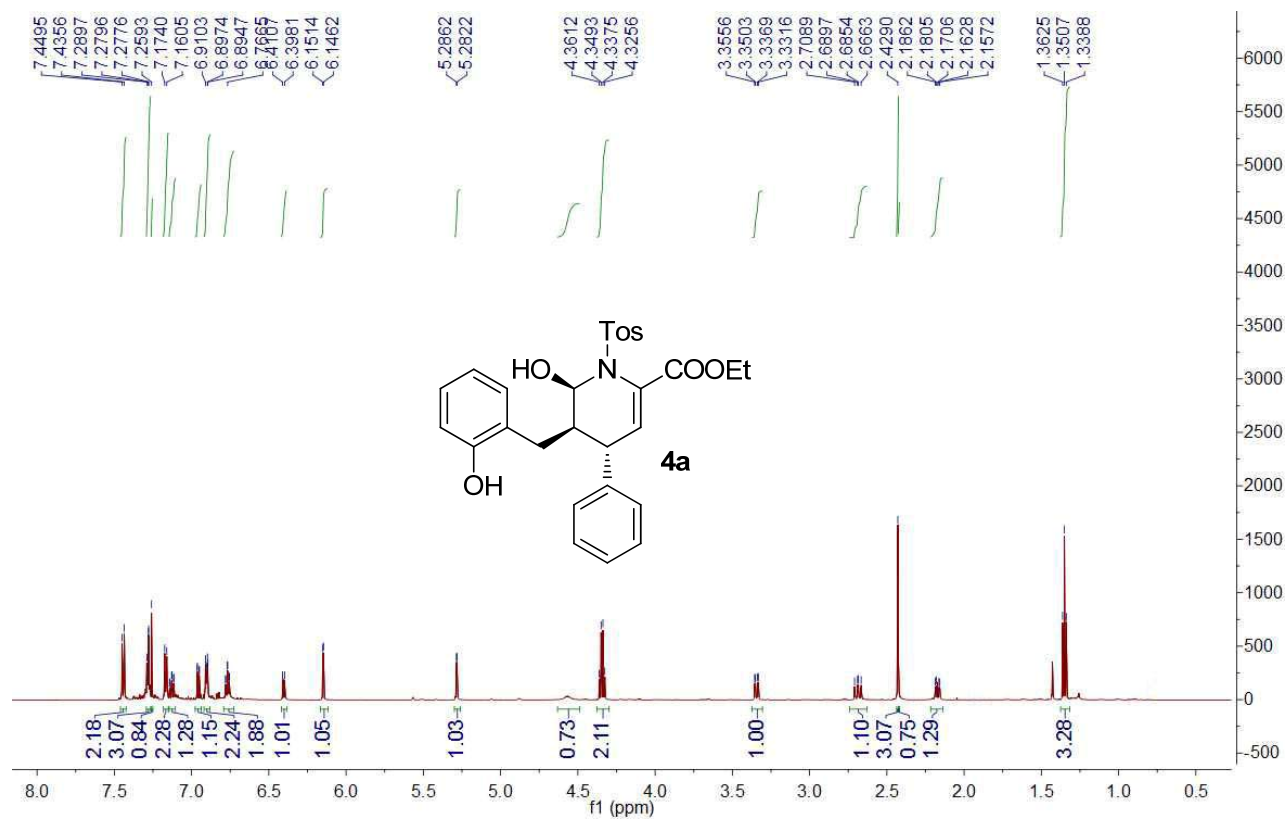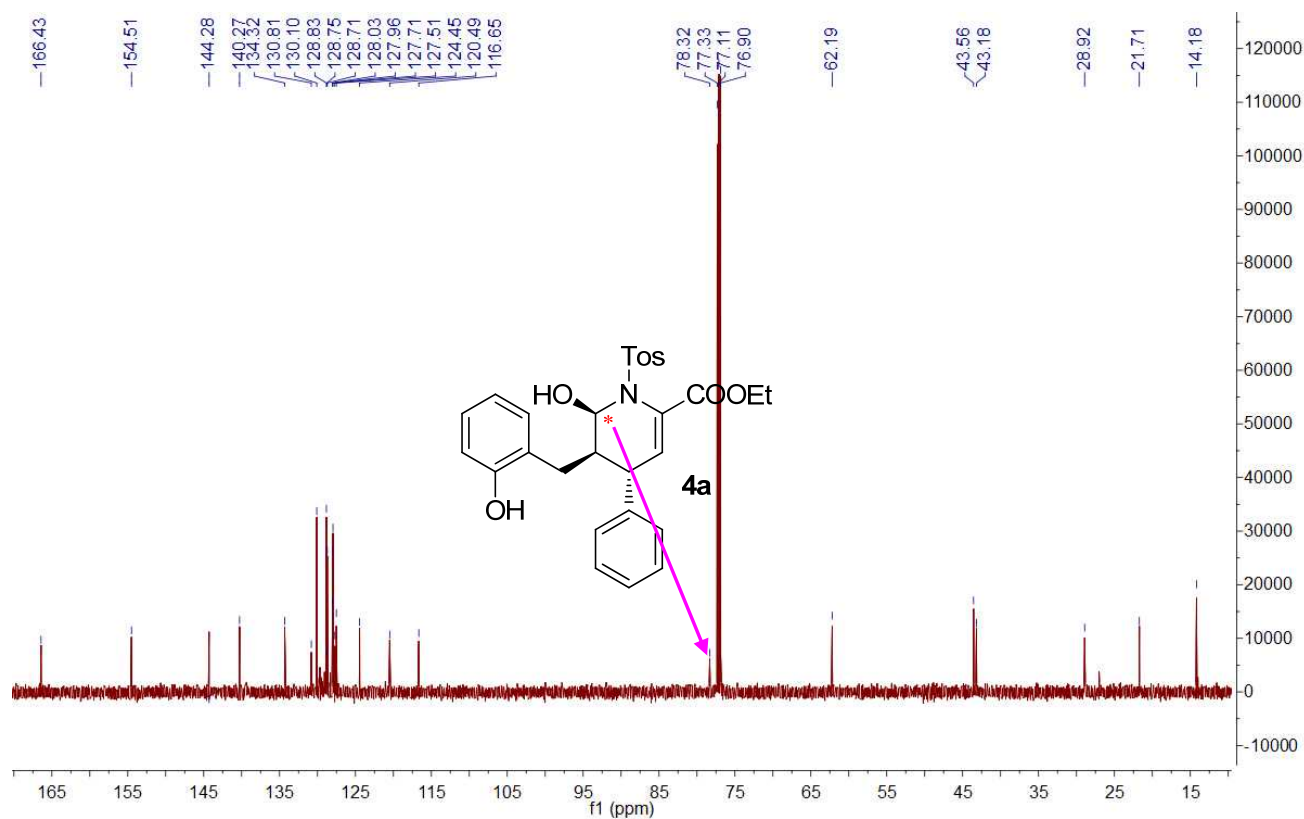

Chrom Type: Fixed WL Chromatogram, 210 nm

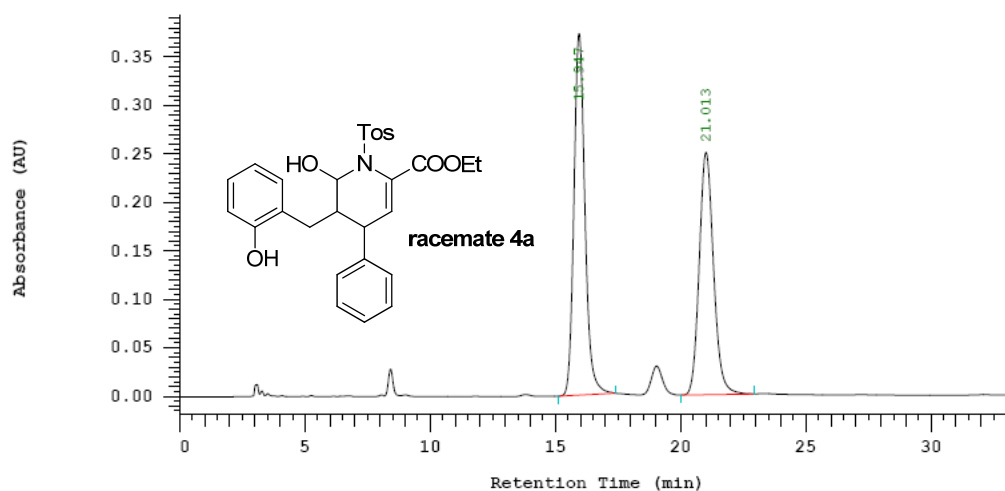

Chrom Type: Fixed WL Chromatogram, 210 nm

Peak Quantitation: AREA

Calculation Method: AREA%

| No. | RT     | Area     | Area %  | BC |
|-----|--------|----------|---------|----|
| 1   | 15.947 | 5628122  | 53.350  | BB |
| 2   | 21.013 | 4921217  | 46.650  | BB |
|     |        | 10549339 | 100.000 |    |

Chrom Type: Fixed WL Chromatogram, 210 nm

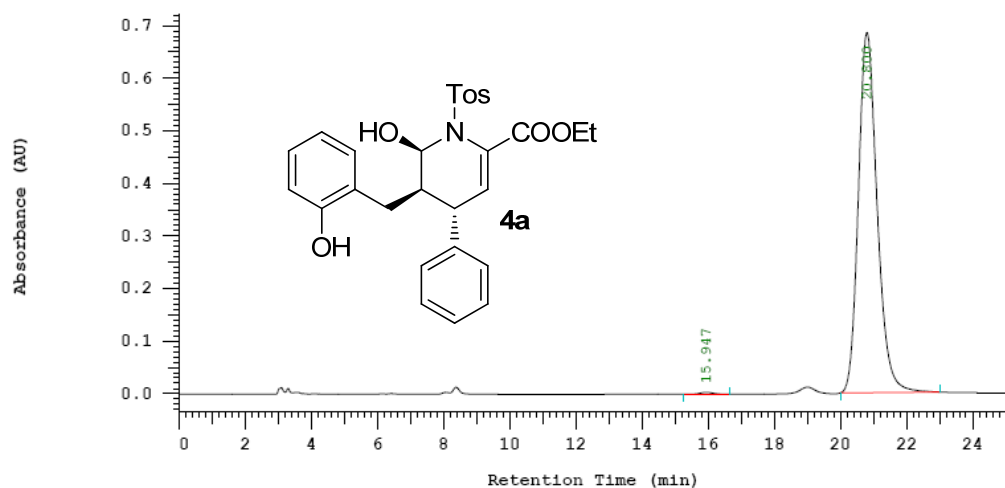

Chrom Type: Fixed WL Chromatogram, 210 nm

Peak Quantitation: AREA

Calculation Method: AREA%

| No. | RT     | Area     | Area %  | BC |
|-----|--------|----------|---------|----|
| 1   | 15.947 | 47456    | 0.350   | BB |
| 2   | 20.800 | 13510124 | 99.650  | BB |
|     |        | 13557580 | 100.000 |    |

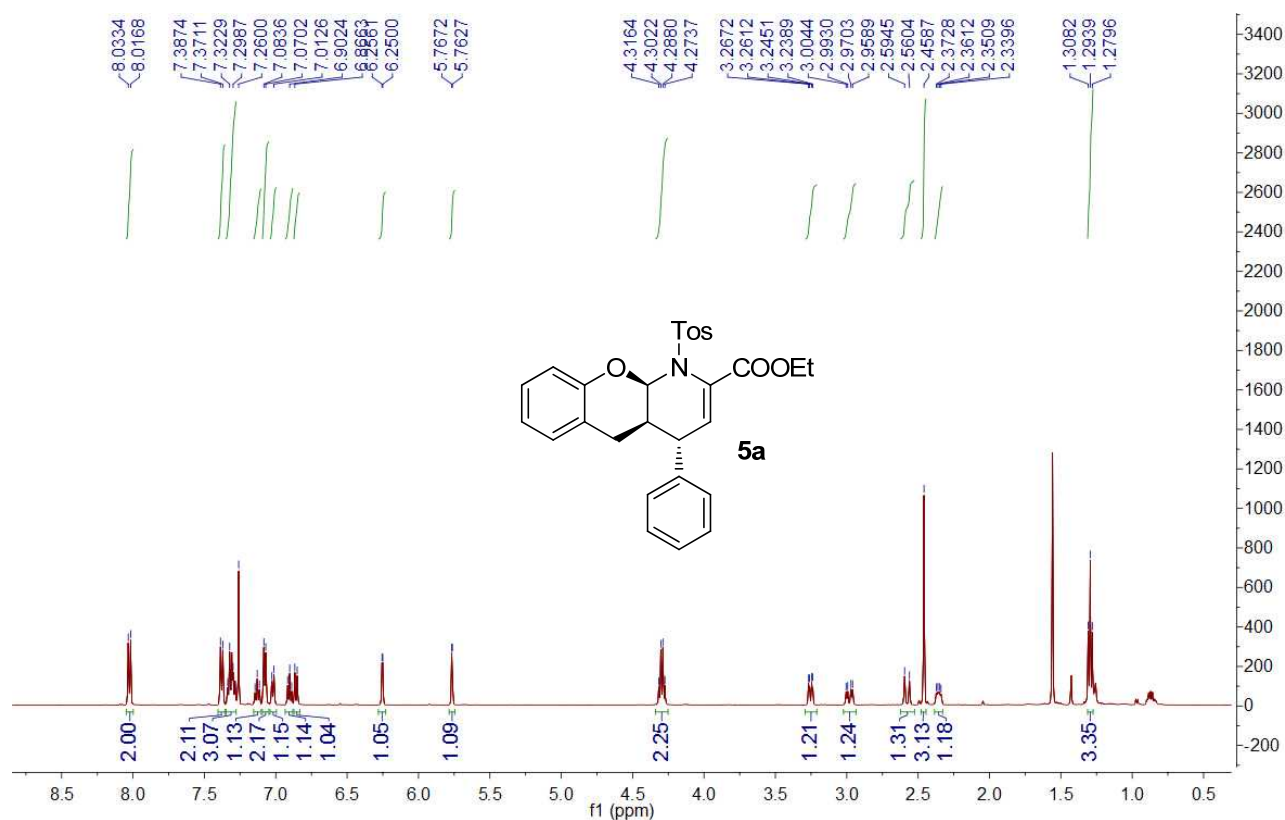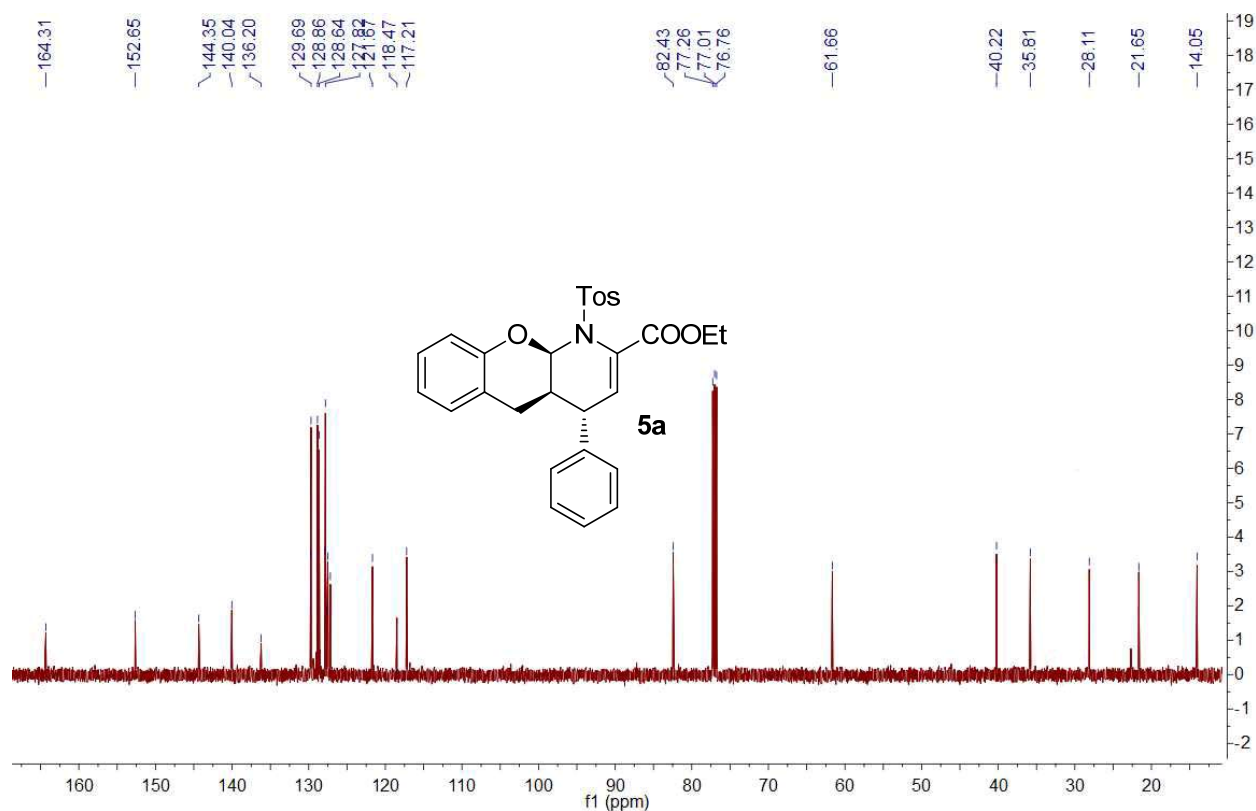

Chrom Type: Fixed WL Chromatogram, 210 nm

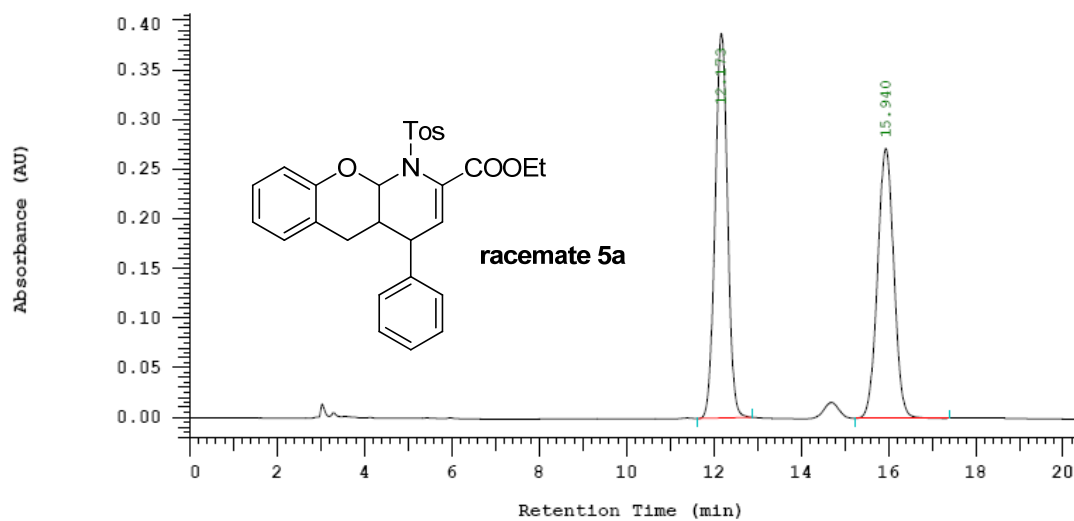

Chrom Type: Fixed WL Chromatogram, 210 nm

Peak Quantitation: AREA

Calculation Method: AREA%

| No. | RT     | Area    | Area %  | BC |
|-----|--------|---------|---------|----|
| 1   | 12.173 | 3829482 | 52.009  | BB |
| 2   | 15.940 | 3533678 | 47.991  | BB |
|     |        | 7363160 | 100.000 |    |

Chrom Type: Fixed WL Chromatogram, 210 nm

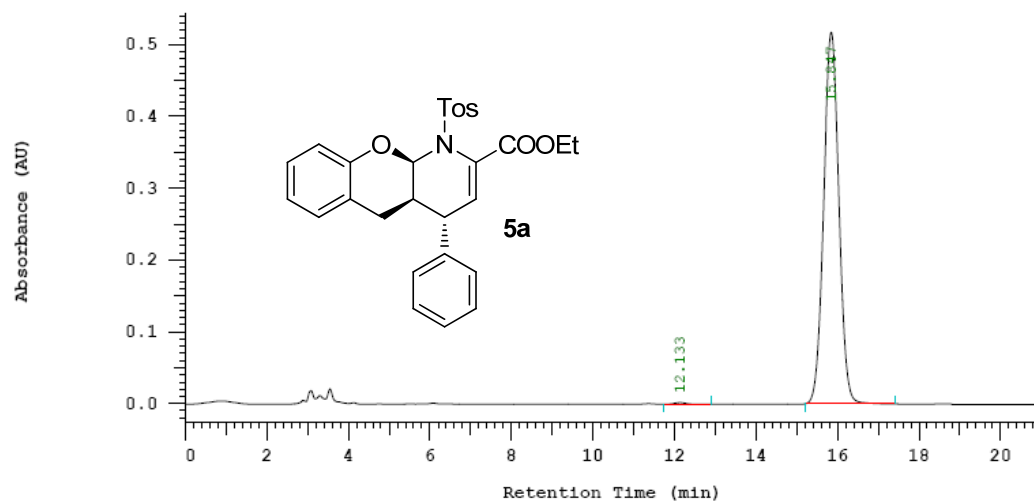

Chrom Type: Fixed WL Chromatogram, 210 nm

Peak Quantitation: AREA

Calculation Method: AREA%

| No. | RT     | Area    | Area %  | BC |
|-----|--------|---------|---------|----|
| 1   | 12.133 | 20419   | 0.304   | BB |
| 2   | 15.847 | 6701838 | 99.696  | BB |
|     |        | 6722257 | 100.000 |    |

**(R) catalyst**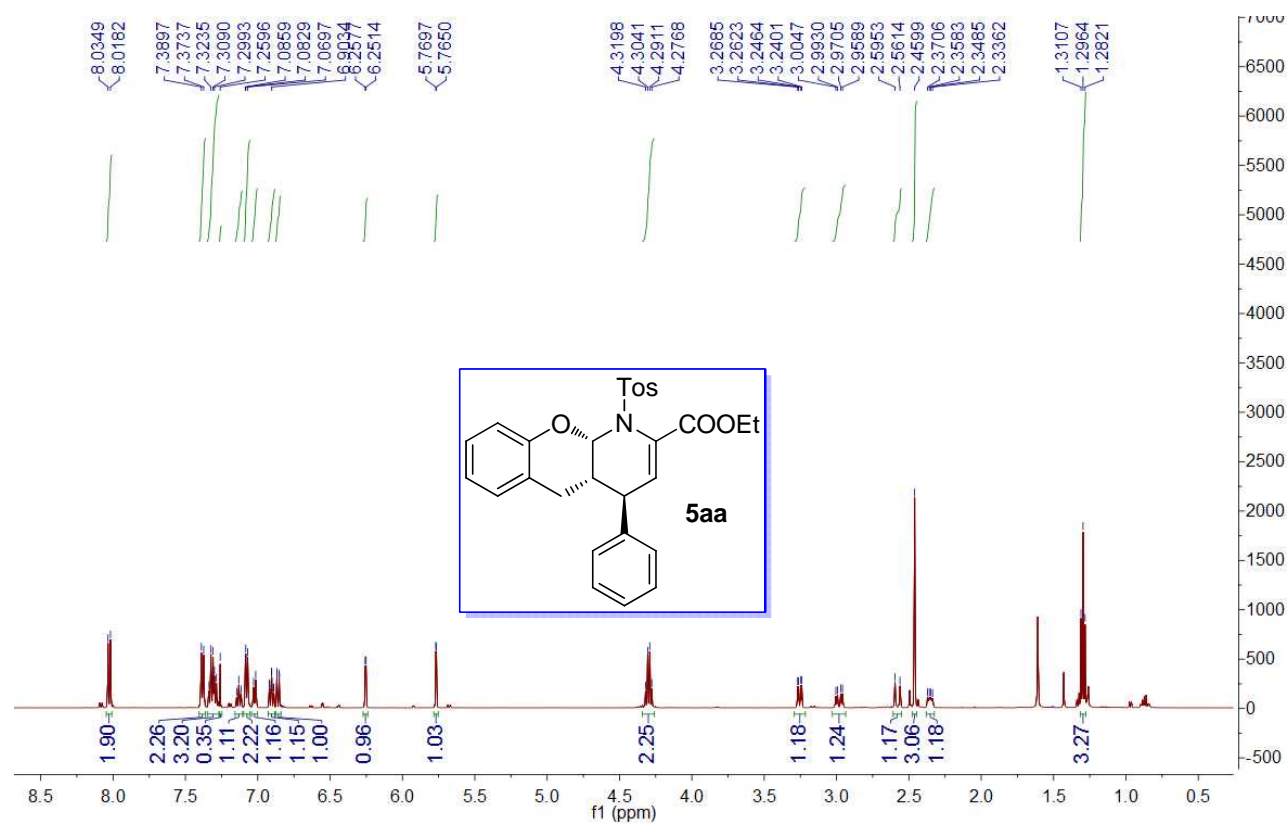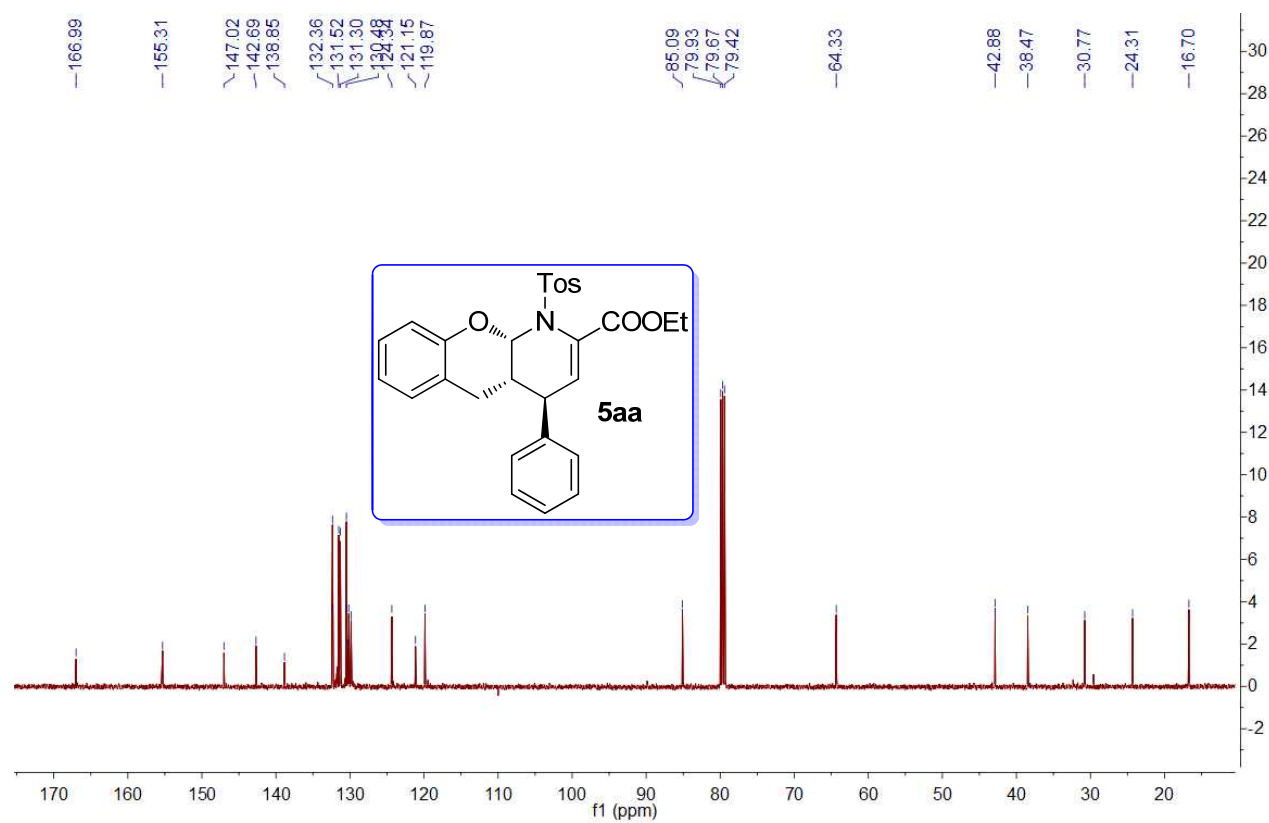

Chrom Type: Fixed WL Chromatogram, 210 nm

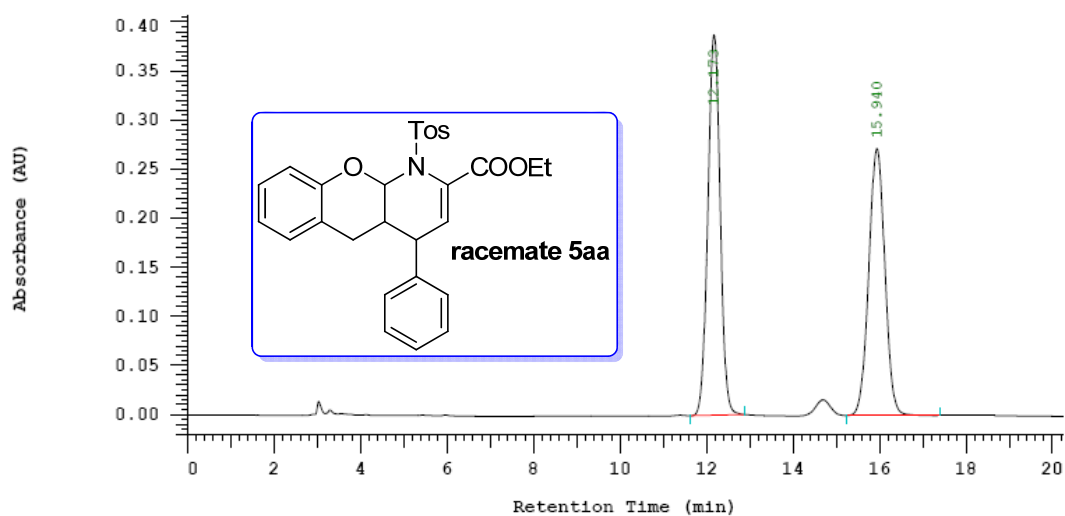

Chrom Type: Fixed WL Chromatogram, 210 nm

Peak Quantitation: AREA

Calculation Method: AREA%

| No. | RT     | Area    | Area %  | BC |
|-----|--------|---------|---------|----|
| 1   | 12.173 | 3829482 | 52.009  | BB |
| 2   | 15.940 | 3533678 | 47.991  | BB |
|     |        | 7363160 | 100.000 |    |

Chrom Type: Fixed WL Chromatogram, 210 nm

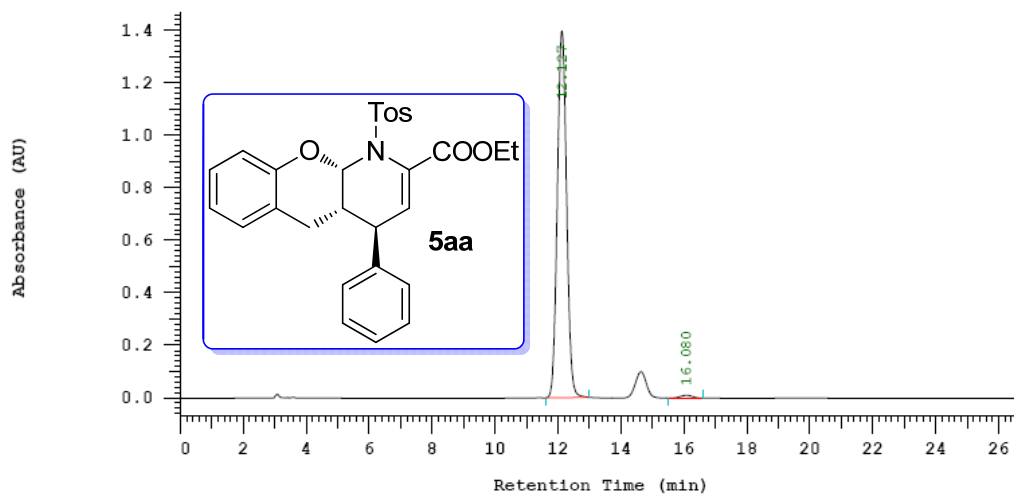

Chrom Type: Fixed WL Chromatogram, 210 nm

Peak Quantitation: AREA

Calculation Method: AREA%

| No. | RT     | Area     | Area %  | BC |
|-----|--------|----------|---------|----|
| 1   | 12.127 | 14137766 | 99.105  | BB |
| 2   | 16.080 | 127693   | 0.895   | BB |
|     |        | 14265459 | 100.000 |    |

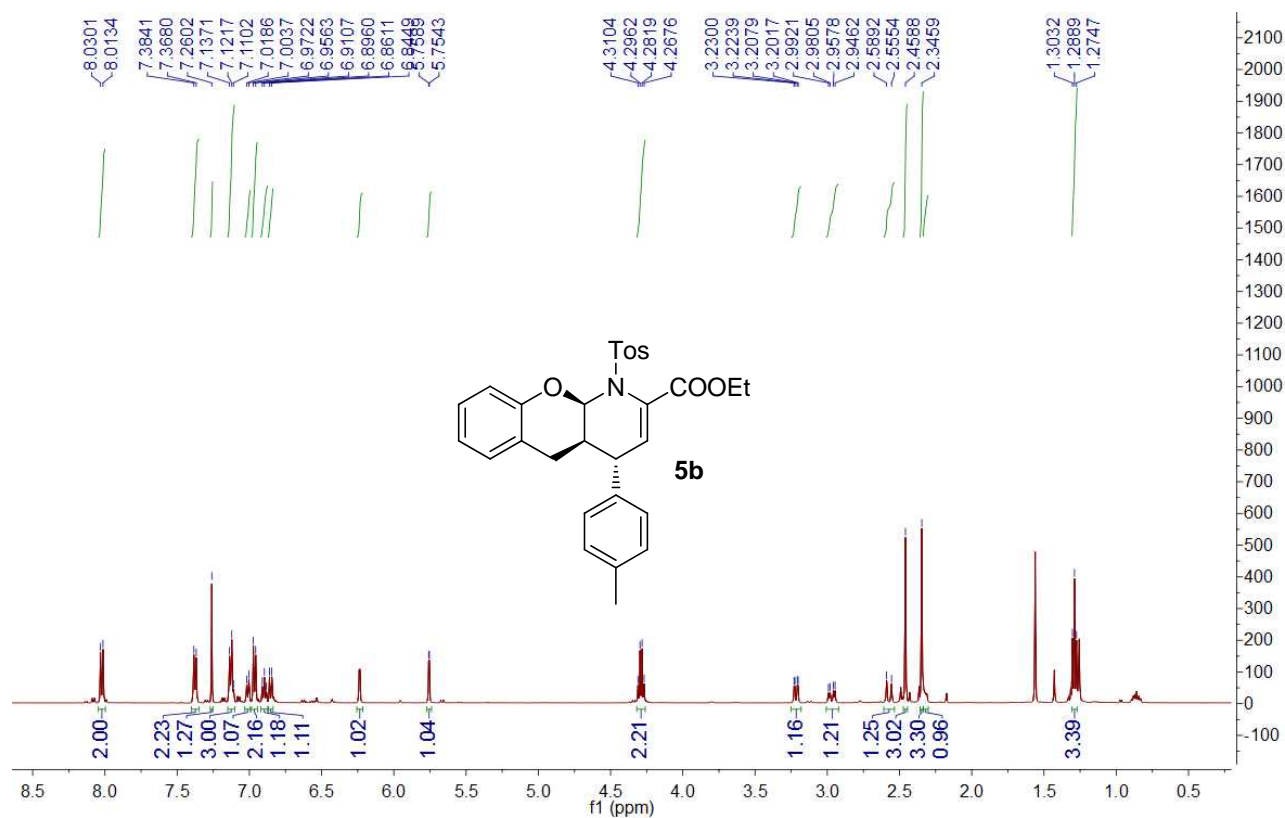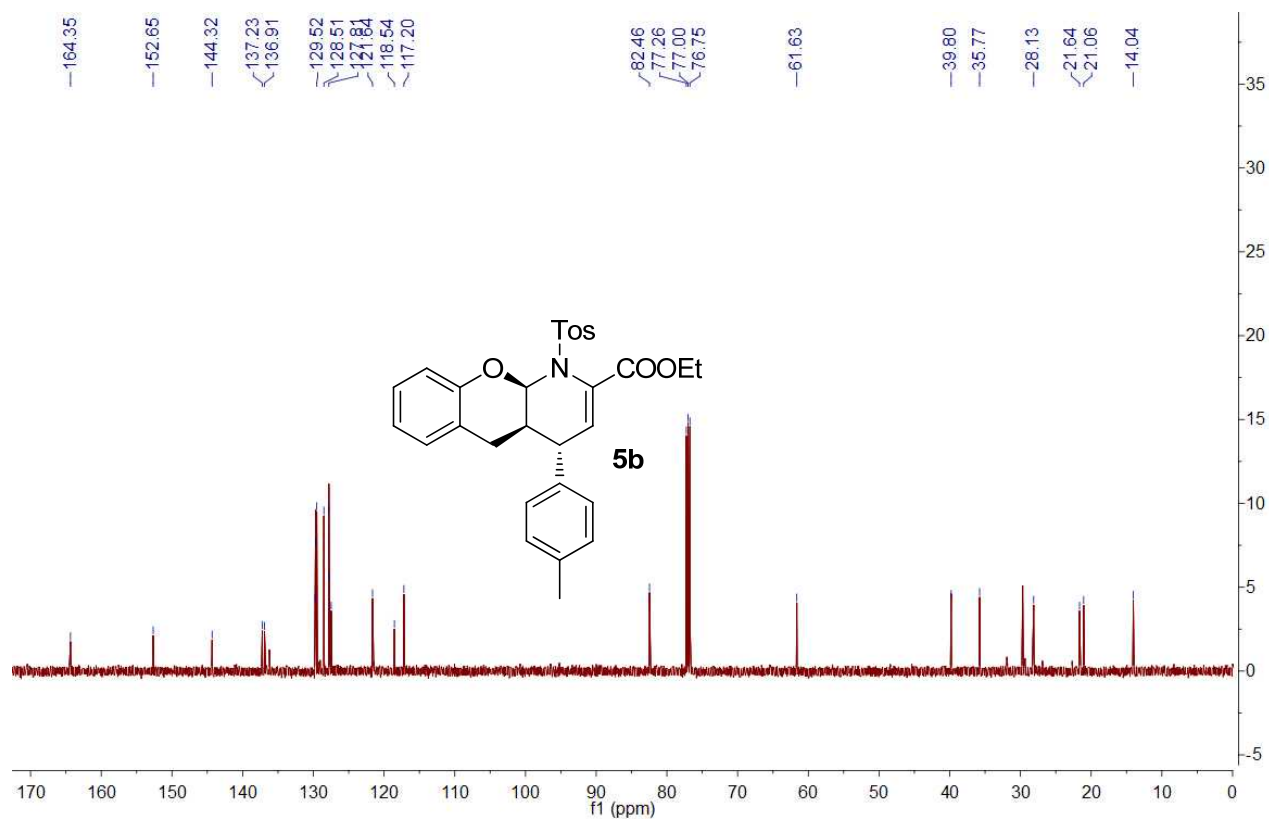

Chrom Type: Fixed WL Chromatogram, 210 nm

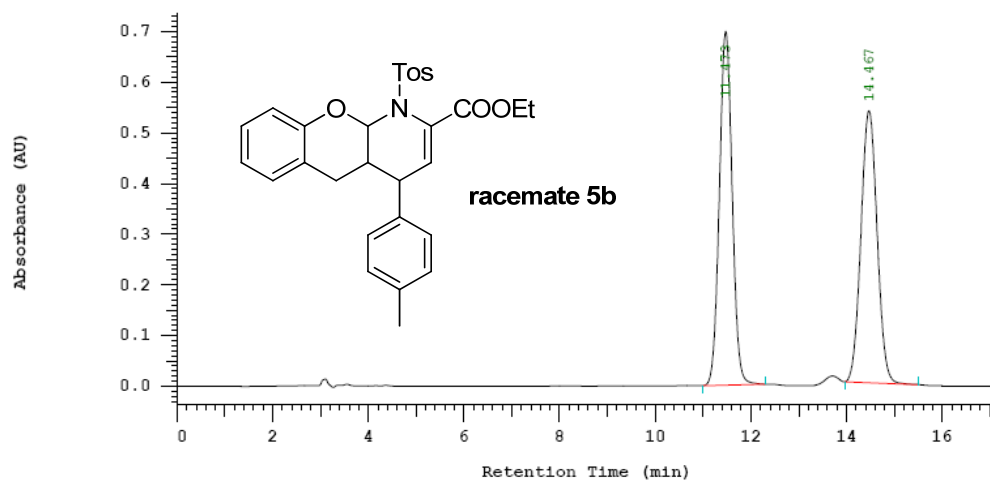

Chrom Type: Fixed WL Chromatogram, 210 nm

Peak Quantitation: AREA  
Calculation Method: AREA%

| No. | RT     | Area     | Area %  | BC |
|-----|--------|----------|---------|----|
| 1   | 11.473 | 6533630  | 50.856  | BB |
| 2   | 14.467 | 6313558  | 49.144  | BB |
|     |        | 12847188 | 100.000 |    |

Chrom Type: Fixed WL Chromatogram, 210 nm

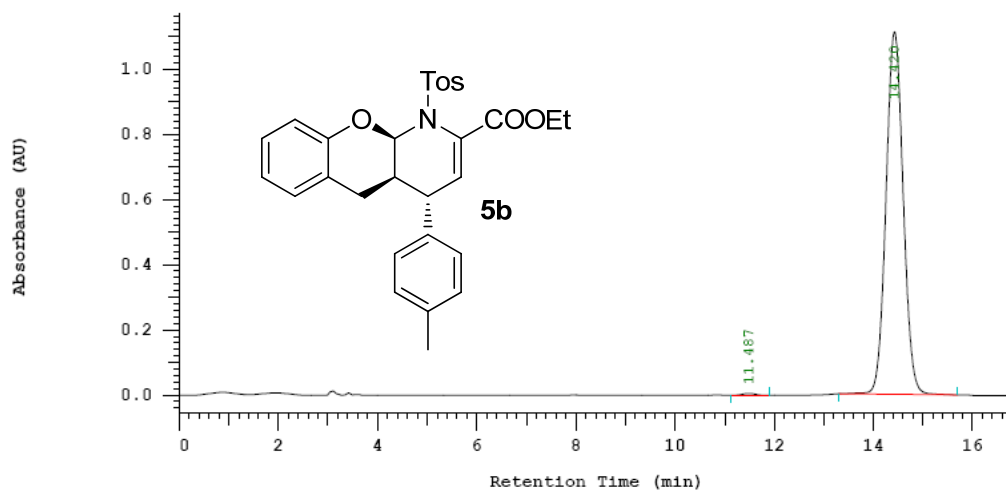

Chrom Type: Fixed WL Chromatogram, 210 nm

Peak Quantitation: AREA  
Calculation Method: AREA%

| No. | RT     | Area     | Area %  | BC |
|-----|--------|----------|---------|----|
| 1   | 11.487 | 48001    | 0.358   | BB |
| 2   | 14.420 | 13349376 | 99.642  | BB |
|     |        | 13397377 | 100.000 |    |

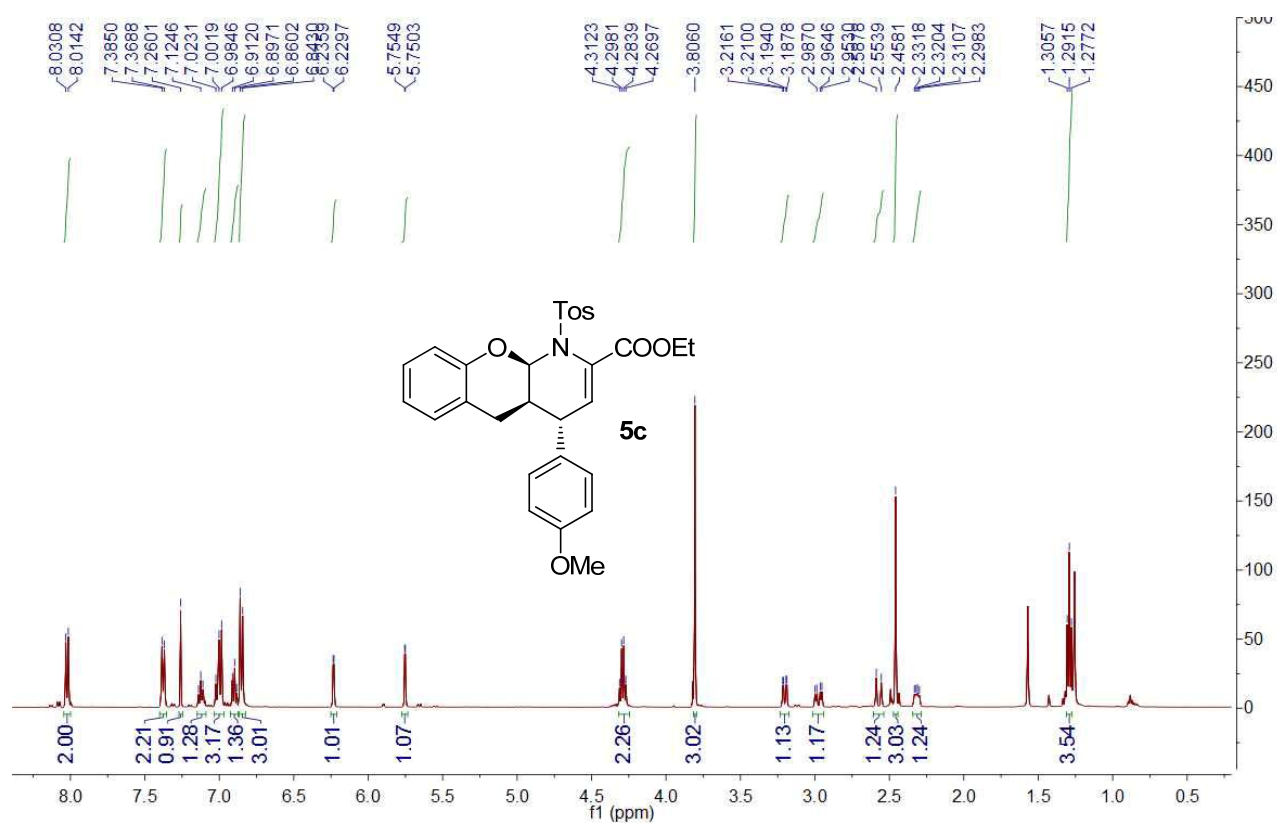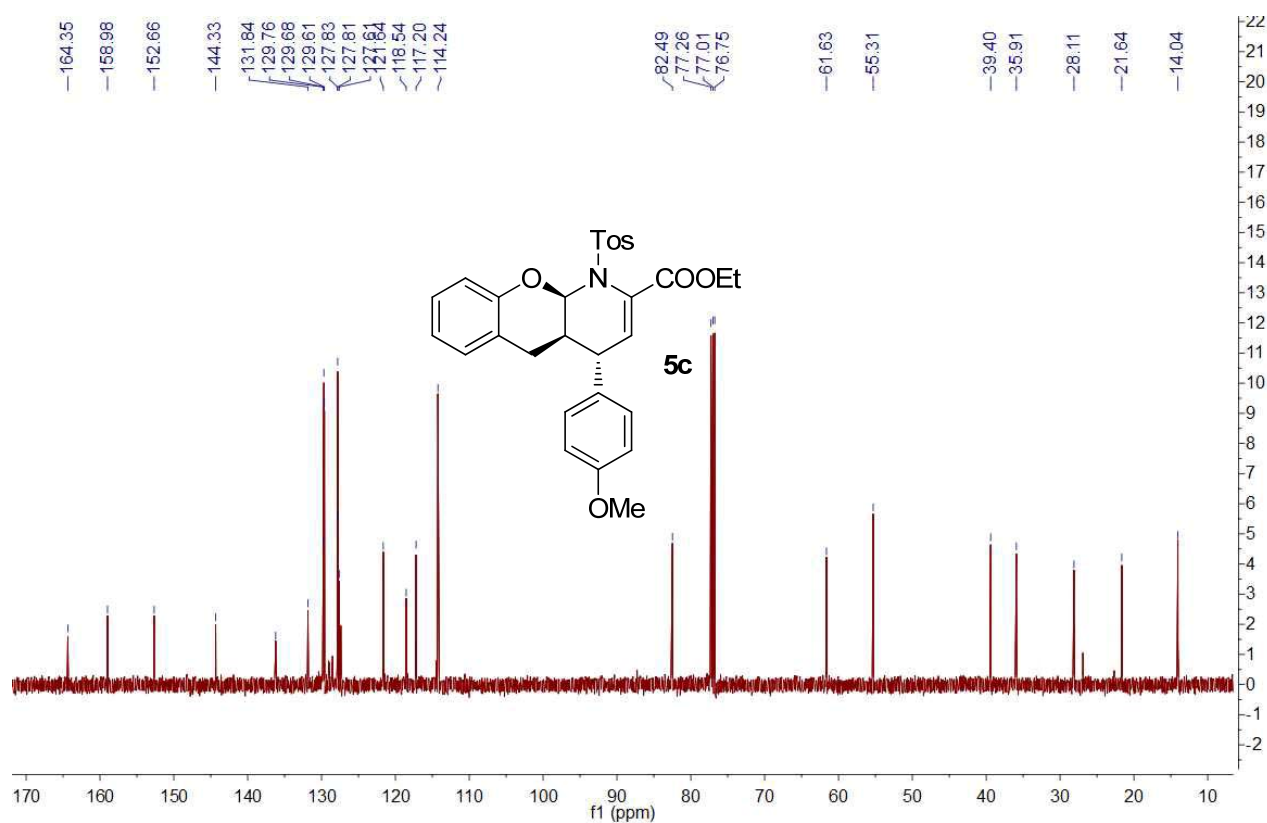

Chrom Type: Fixed WL Chromatogram, 210 nm

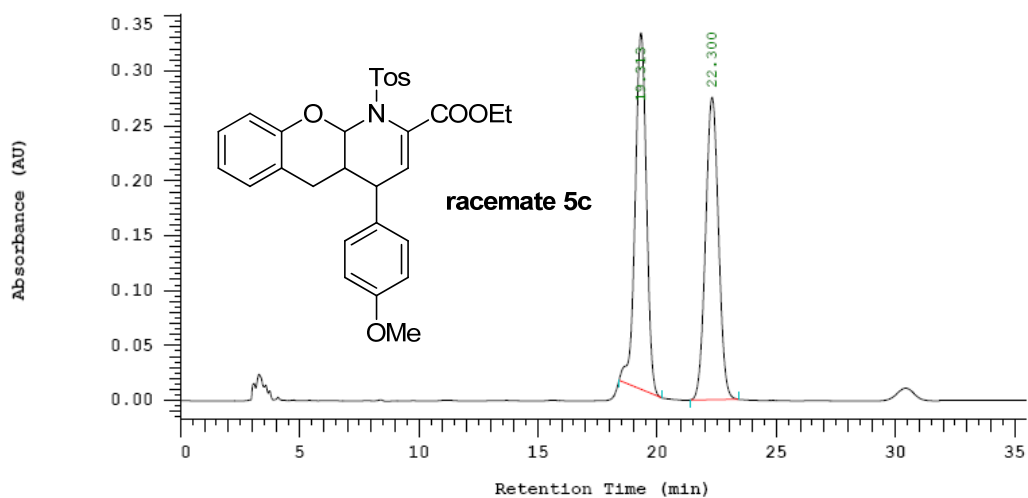

Chrom Type: Fixed WL Chromatogram, 210 nm

Peak Quantitation: AREA  
Calculation Method: AREA%

| No. | RT     | Area     | Area %  | BC |
|-----|--------|----------|---------|----|
| 1   | 19.313 | 5281168  | 50.630  | BB |
| 2   | 22.300 | 5149762  | 49.370  | BB |
|     |        | 10430930 | 100.000 |    |

Chrom Type: Fixed WL Chromatogram, 210 nm

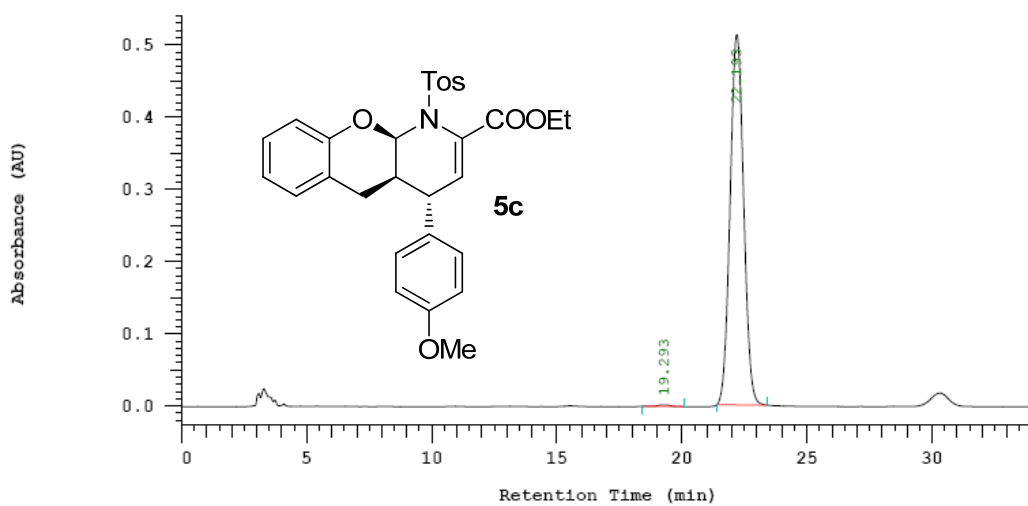

Chrom Type: Fixed WL Chromatogram, 210 nm

Peak Quantitation: AREA  
Calculation Method: AREA%

| No. | RT     | Area    | Area %  | BC |
|-----|--------|---------|---------|----|
| 1   | 19.293 | 34882   | 0.364   | BB |
| 2   | 22.193 | 9547754 | 99.636  | BB |
|     |        | 9582636 | 100.000 |    |

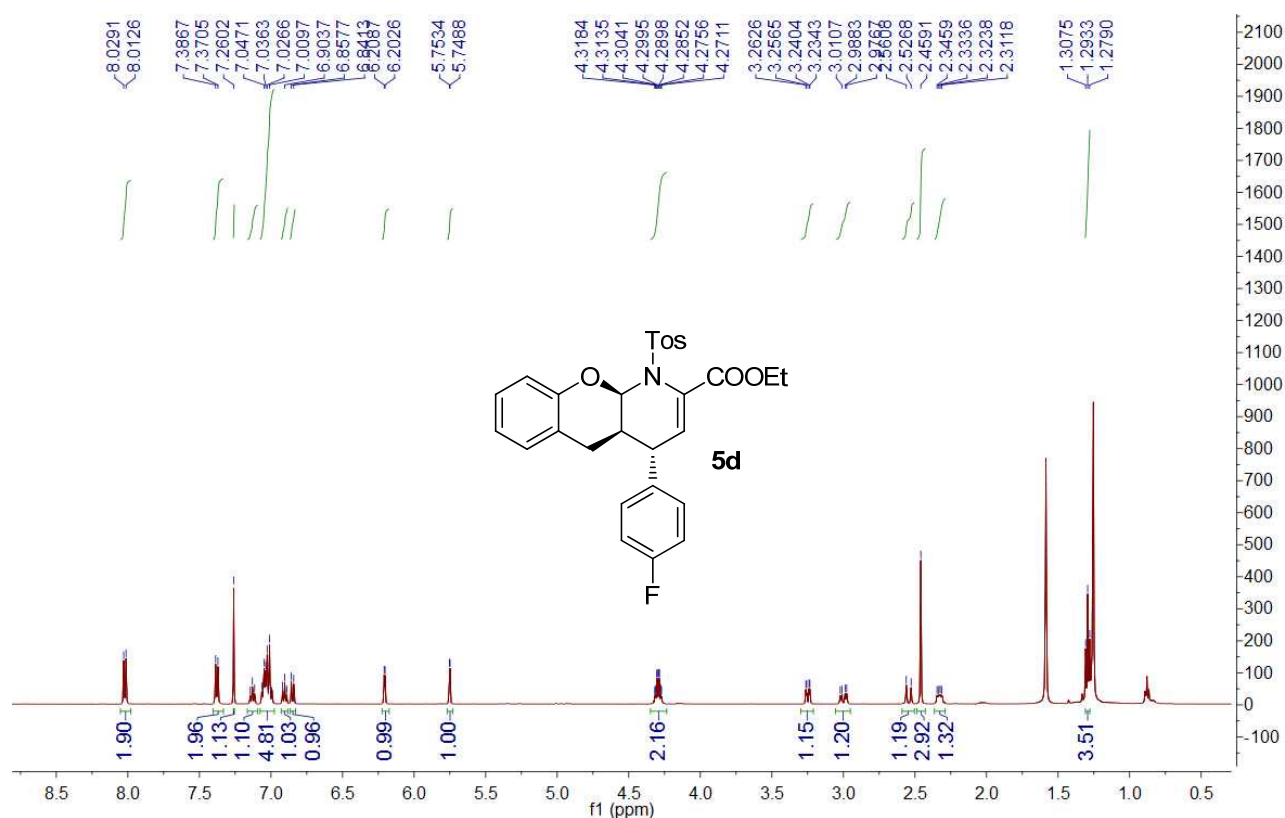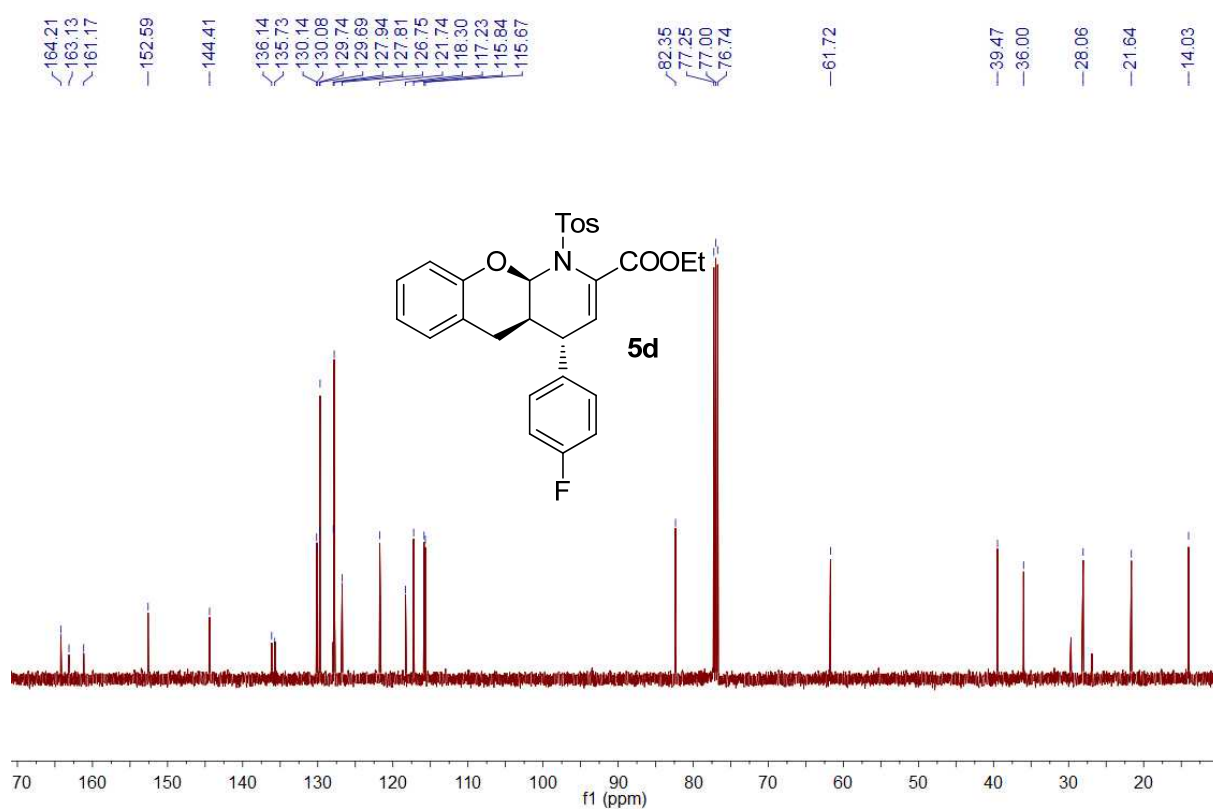

Chrom Type: Fixed WL Chromatogram, 210 nm

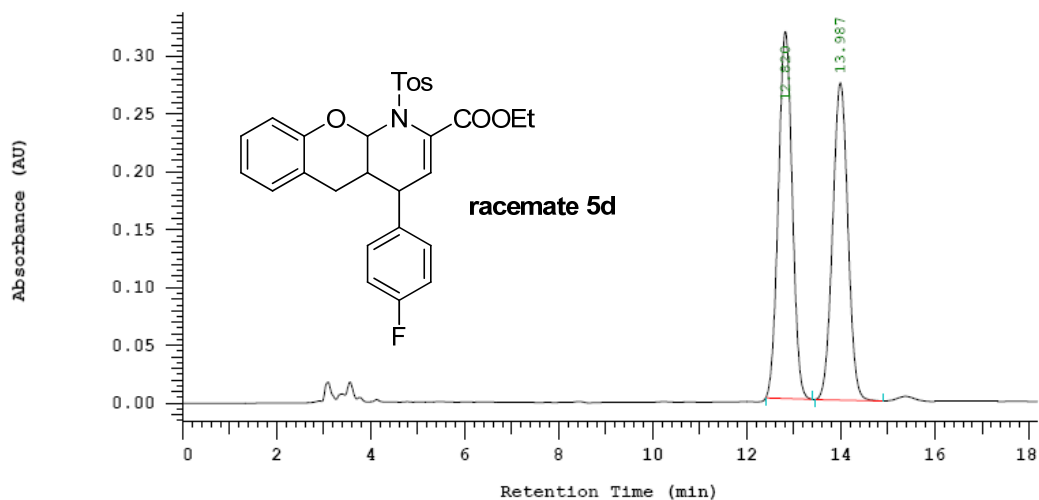

Chrom Type: Fixed WL Chromatogram, 210 nm

Peak Quantitation: AREA

Calculation Method: AREA%

| No. | RT     | Area    | Area %  | BC |
|-----|--------|---------|---------|----|
| 1   | 12.820 | 3250877 | 51.157  | BB |
| 2   | 13.987 | 3103866 | 48.843  | BB |
|     |        | 6354743 | 100.000 |    |

Chrom Type: Fixed WL Chromatogram, 210 nm

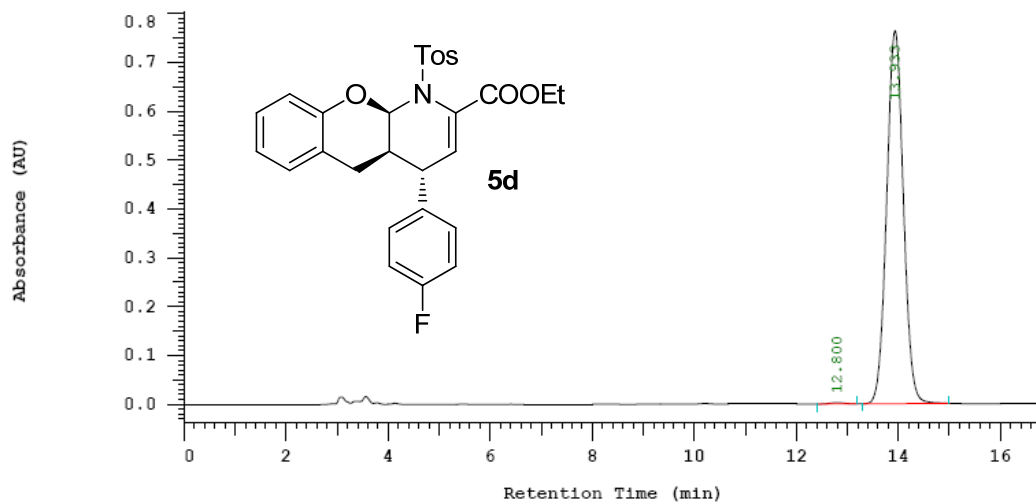

Chrom Type: Fixed WL Chromatogram, 210 nm

Peak Quantitation: AREA

Calculation Method: AREA%

| No. | RT     | Area    | Area %  | BC |
|-----|--------|---------|---------|----|
| 1   | 12.800 | 20833   | 0.239   | BB |
| 2   | 13.933 | 8706917 | 99.761  | BB |
|     |        | 8727750 | 100.000 |    |

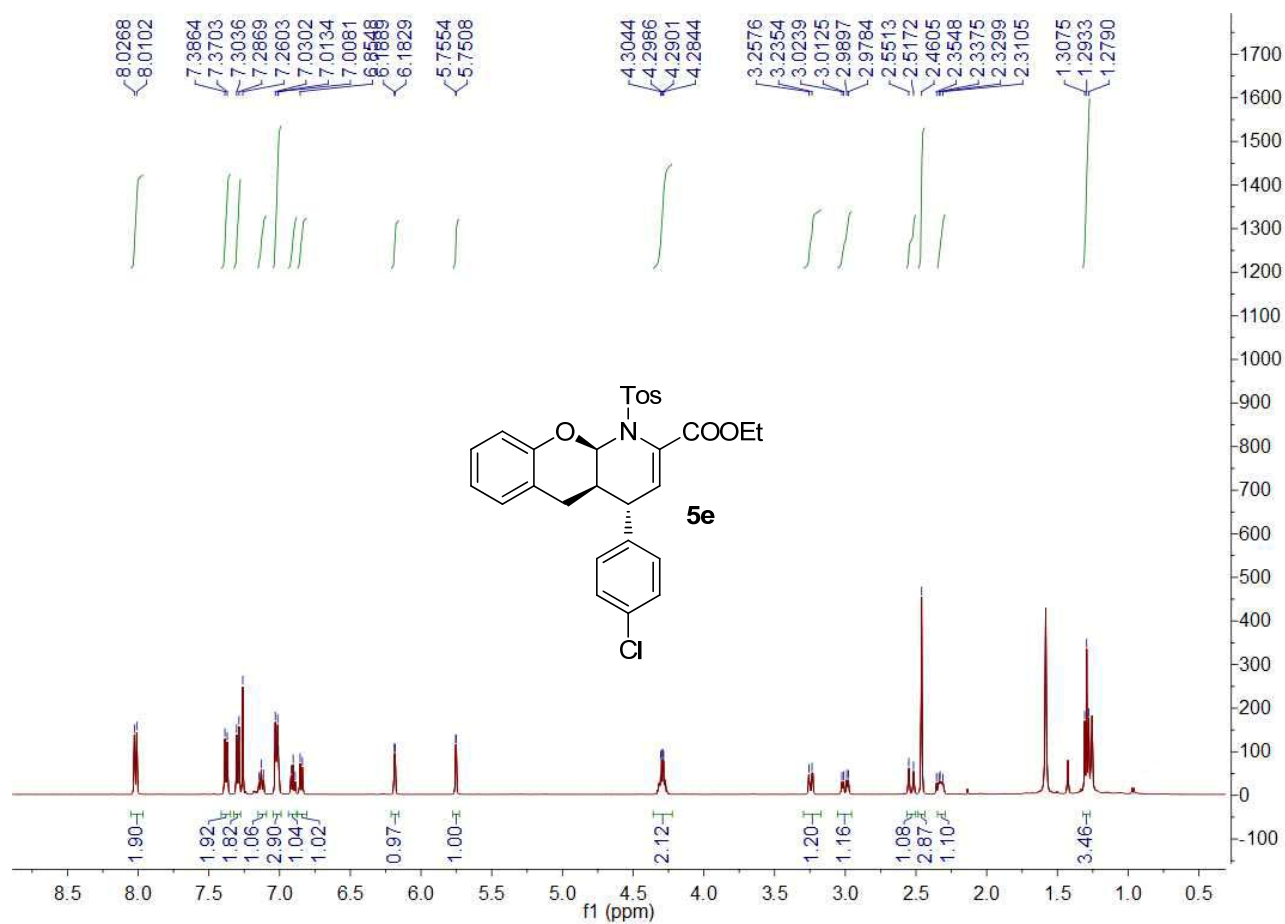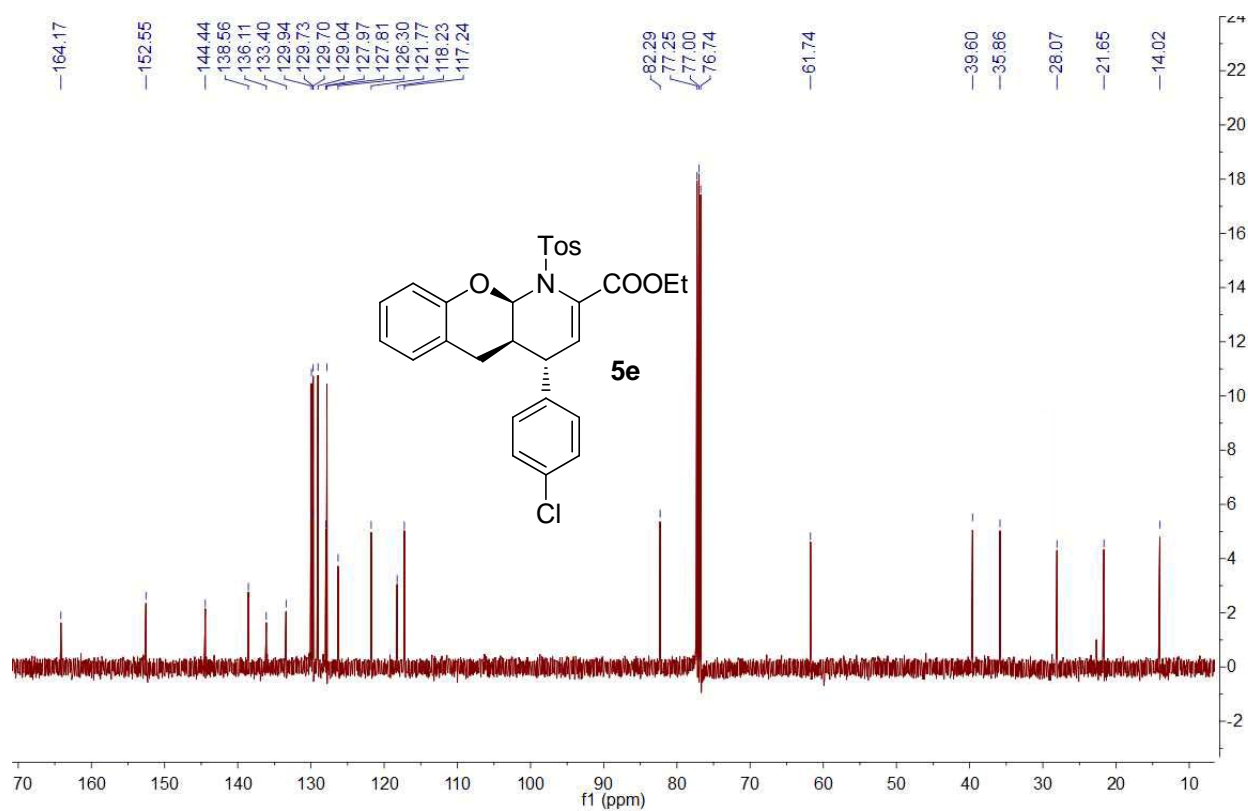

Chrom Type: Fixed WL Chromatogram, 210 nm

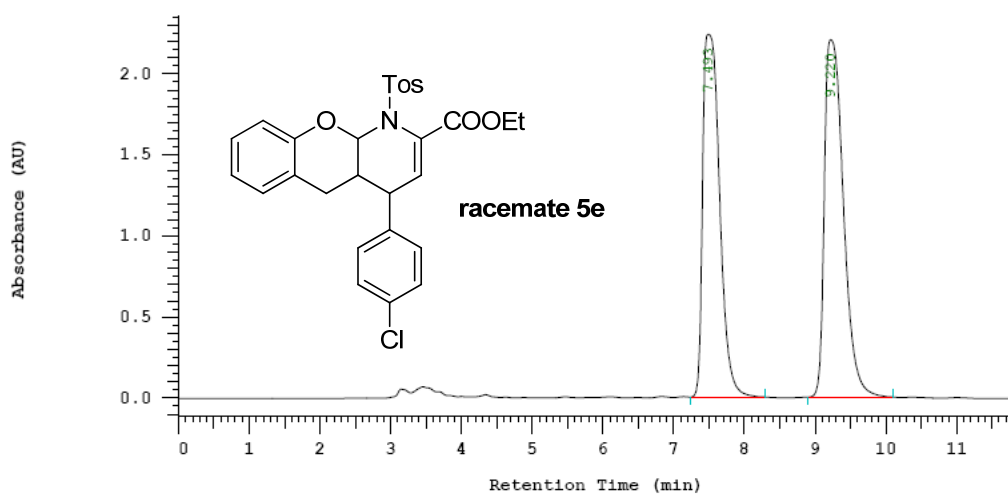

Chrom Type: Fixed WL Chromatogram, 210 nm

Peak Quantitation: AREA  
Calculation Method: AREA%

| No. | RT    | Area     | Area %  | BC |
|-----|-------|----------|---------|----|
| 1   | 7.493 | 18605795 | 47.373  | BB |
| 2   | 9.220 | 20669086 | 52.627  | BB |
|     |       | 39274881 | 100.000 |    |

Chrom Type: Fixed WL Chromatogram, 210 nm

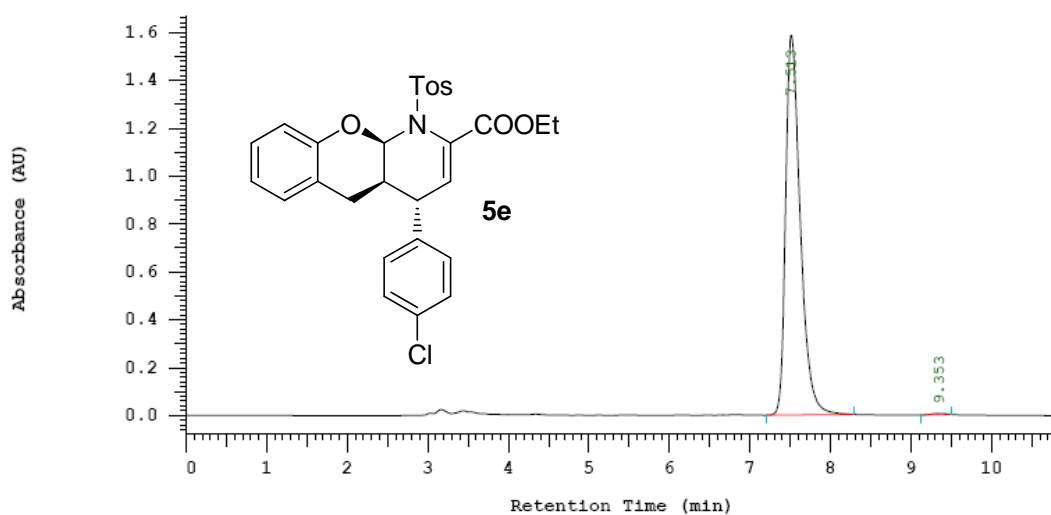

Chrom Type: Fixed WL Chromatogram, 210 nm

Peak Quantitation: AREA  
Calculation Method: AREA%

| No. | RT    | Area     | Area %  | BC |
|-----|-------|----------|---------|----|
| 1   | 7.513 | 10005808 | 99.750  | BB |
| 2   | 9.353 | 25051    | 0.250   | BB |
|     |       | 10030859 | 100.000 |    |

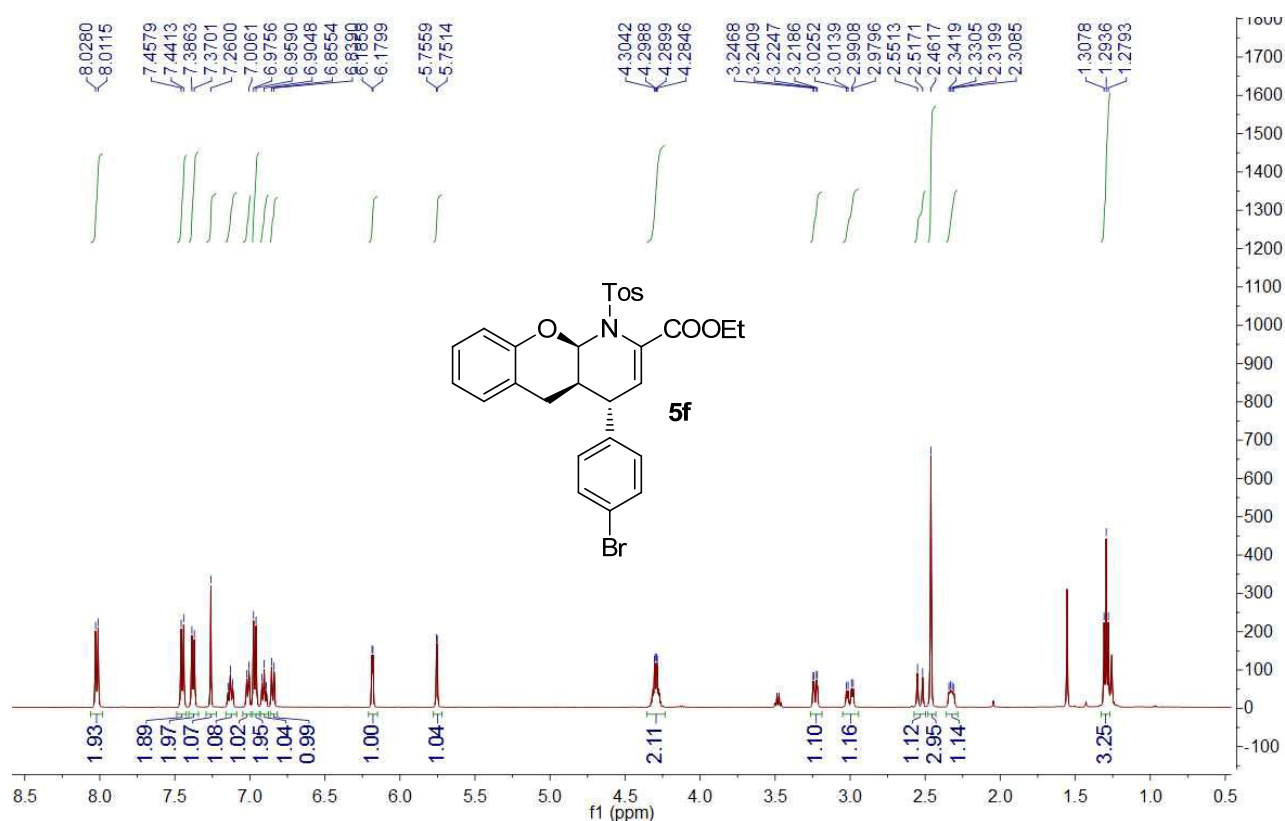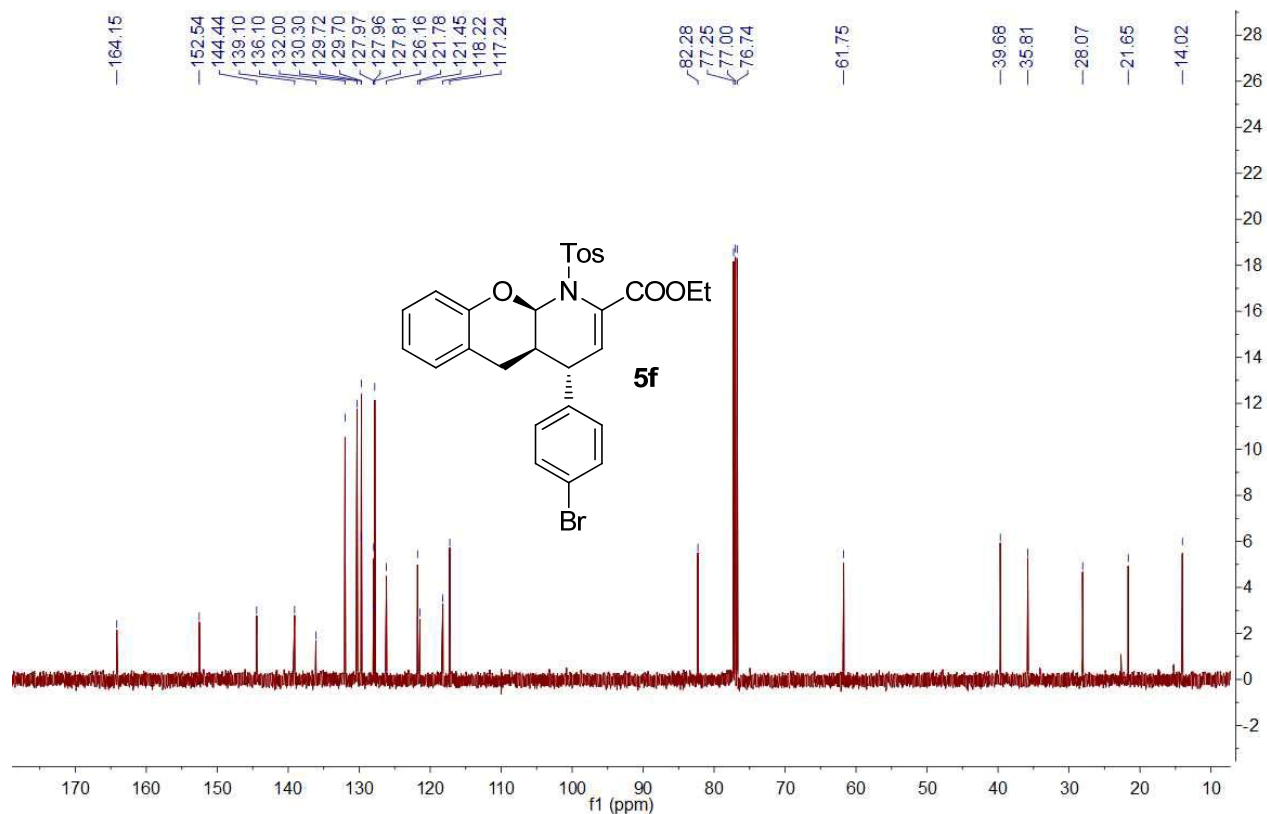

Chrom Type: Fixed WL Chromatogram, 210 nm

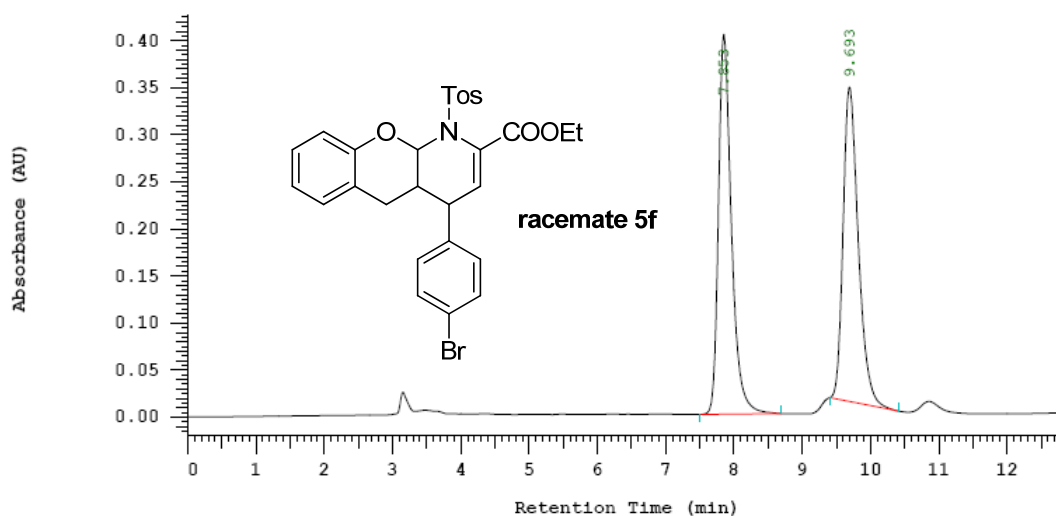

Chrom Type: Fixed WL Chromatogram, 210 nm

Peak Quantitation: AREA

Calculation Method: AREA%

| No. | RT    | Area    | Area %  | BC |
|-----|-------|---------|---------|----|
| 1   | 7.853 | 2677312 | 50.984  | BB |
| 2   | 9.693 | 2573936 | 49.016  | BB |
|     |       | 5251248 | 100.000 |    |

Chrom Type: Fixed WL Chromatogram, 210 nm

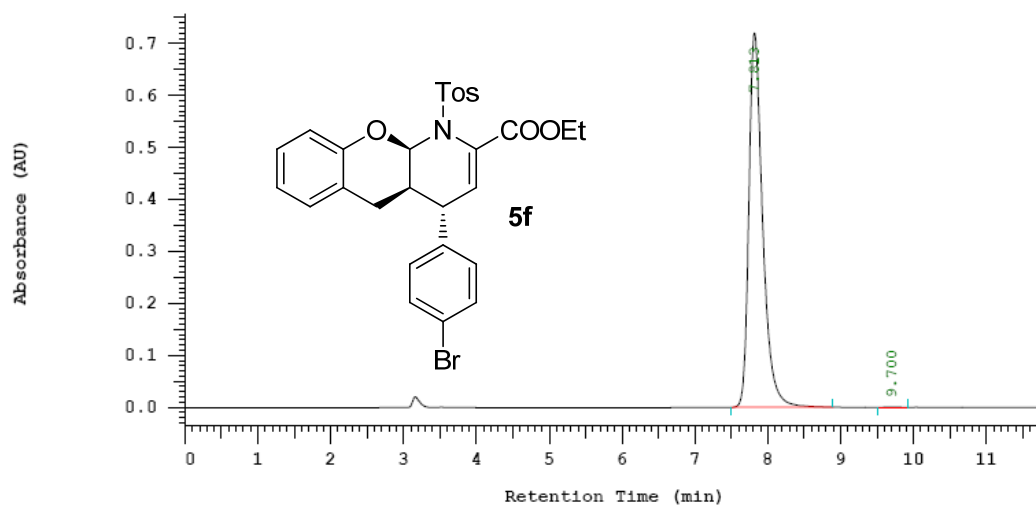

Chrom Type: Fixed WL Chromatogram, 210 nm

Peak Quantitation: AREA

Calculation Method: AREA%

| No. | RT    | Area    | Area %  | BC |
|-----|-------|---------|---------|----|
| 1   | 7.813 | 4761893 | 99.926  | BB |
| 2   | 9.700 | 3541    | 0.074   | BB |
|     |       | 4765434 | 100.000 |    |

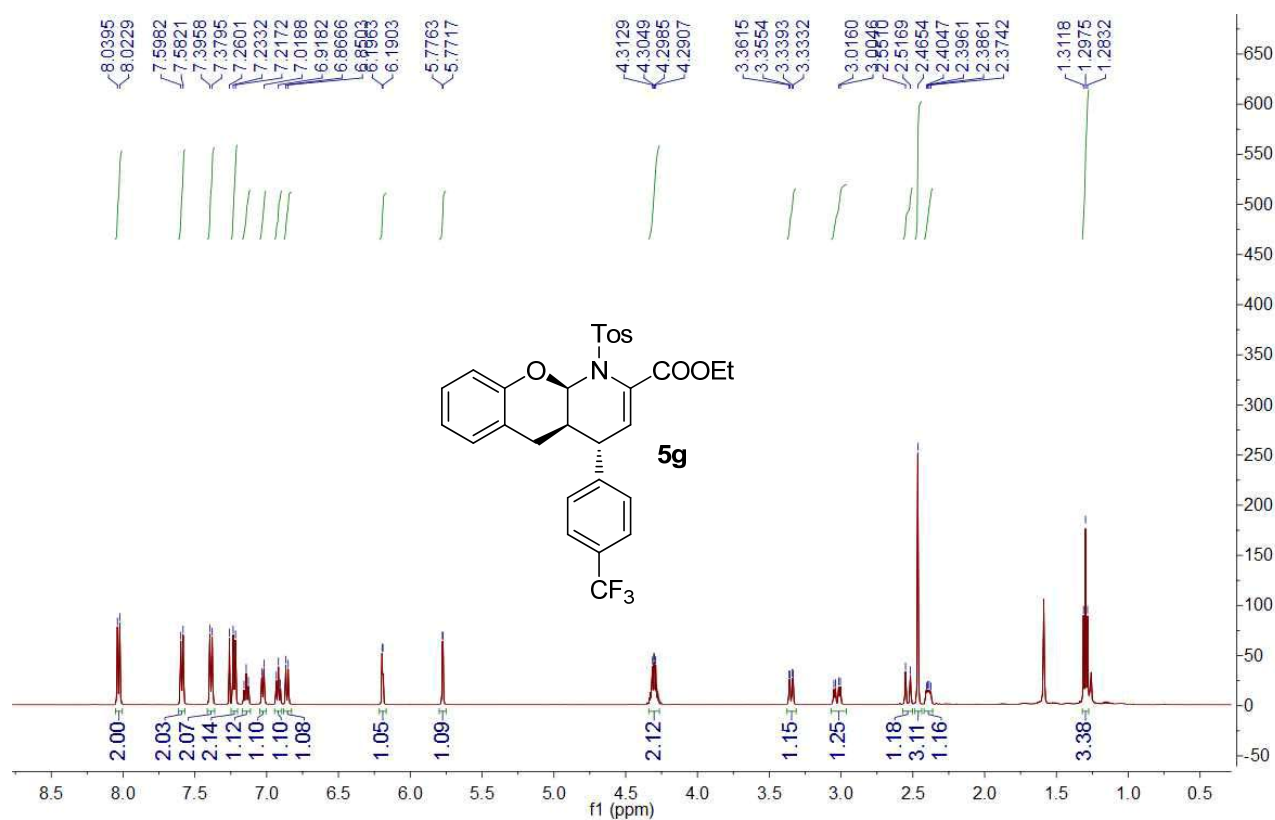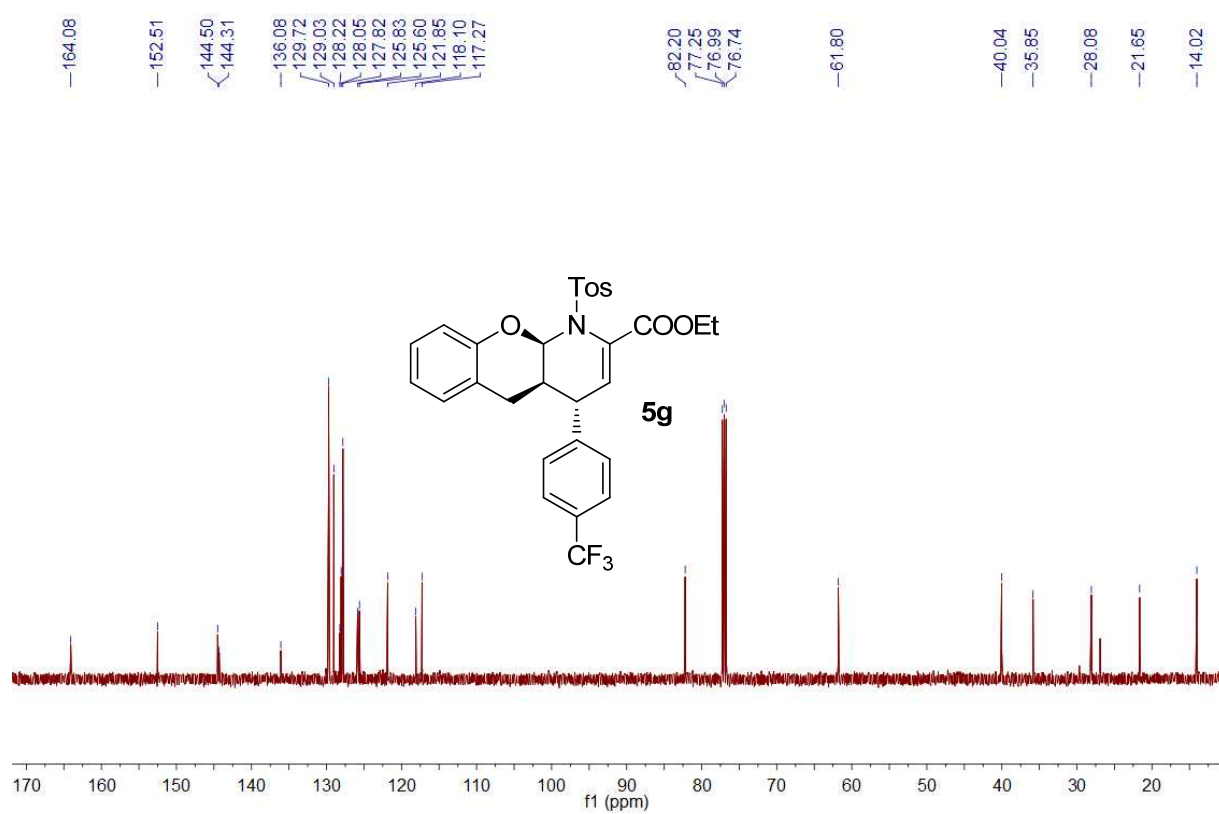

Chrom Type: Fixed WL Chromatogram, 210 nm

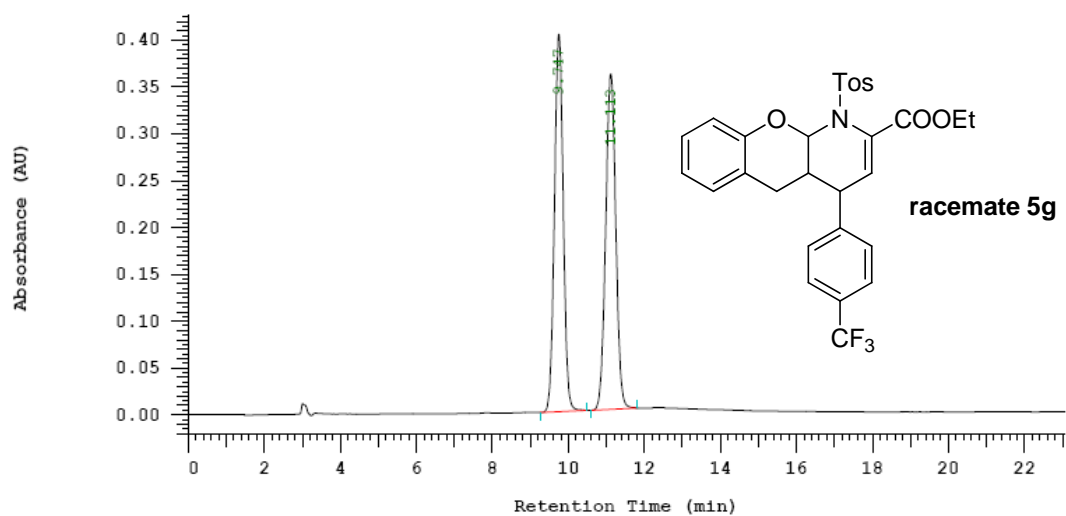

Chrom Type: Fixed WL Chromatogram, 210 nm

Peak Quantitation: AREA

Calculation Method: AREA%

| No. | RT     | Area    | Area %  | BC |
|-----|--------|---------|---------|----|
| 1   | 9.747  | 3219177 | 49.529  | BB |
| 2   | 11.113 | 3280415 | 50.471  | BB |
|     |        | 6499592 | 100.000 |    |

Chrom Type: Fixed WL Chromatogram, 210 nm

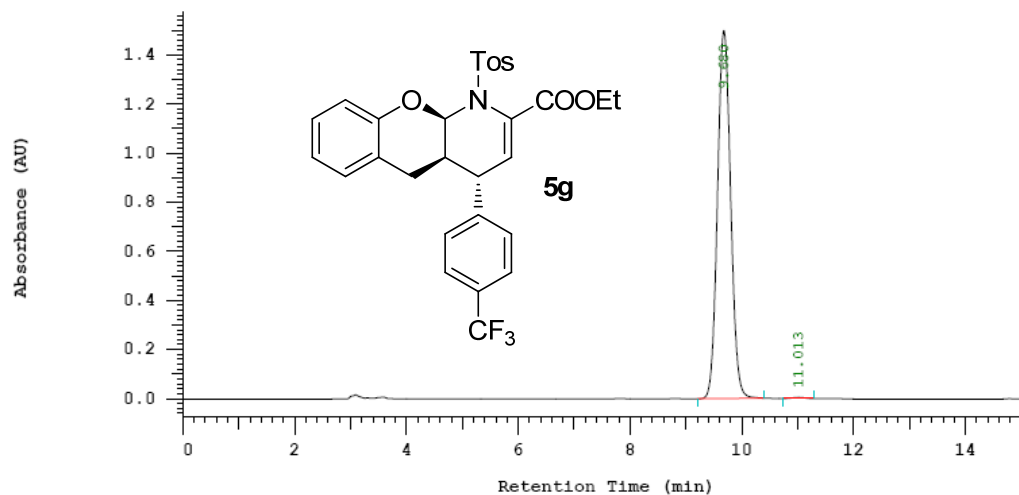

Chrom Type: Fixed WL Chromatogram, 210 nm

Peak Quantitation: AREA

Calculation Method: AREA%

| No. | RT     | Area     | Area %  | BC |
|-----|--------|----------|---------|----|
| 1   | 9.680  | 12183055 | 99.737  | BB |
| 2   | 11.013 | 32095    | 0.263   | BB |
|     |        | 12215150 | 100.000 |    |

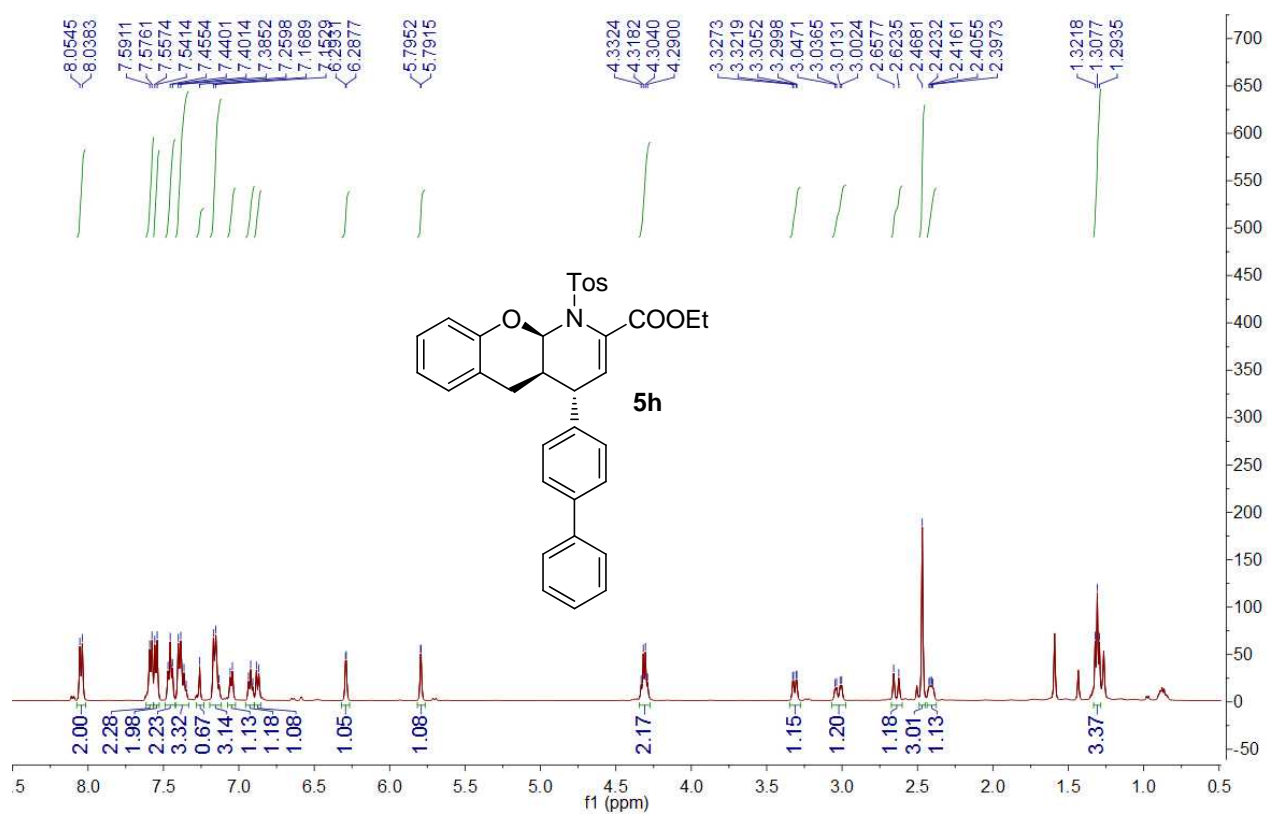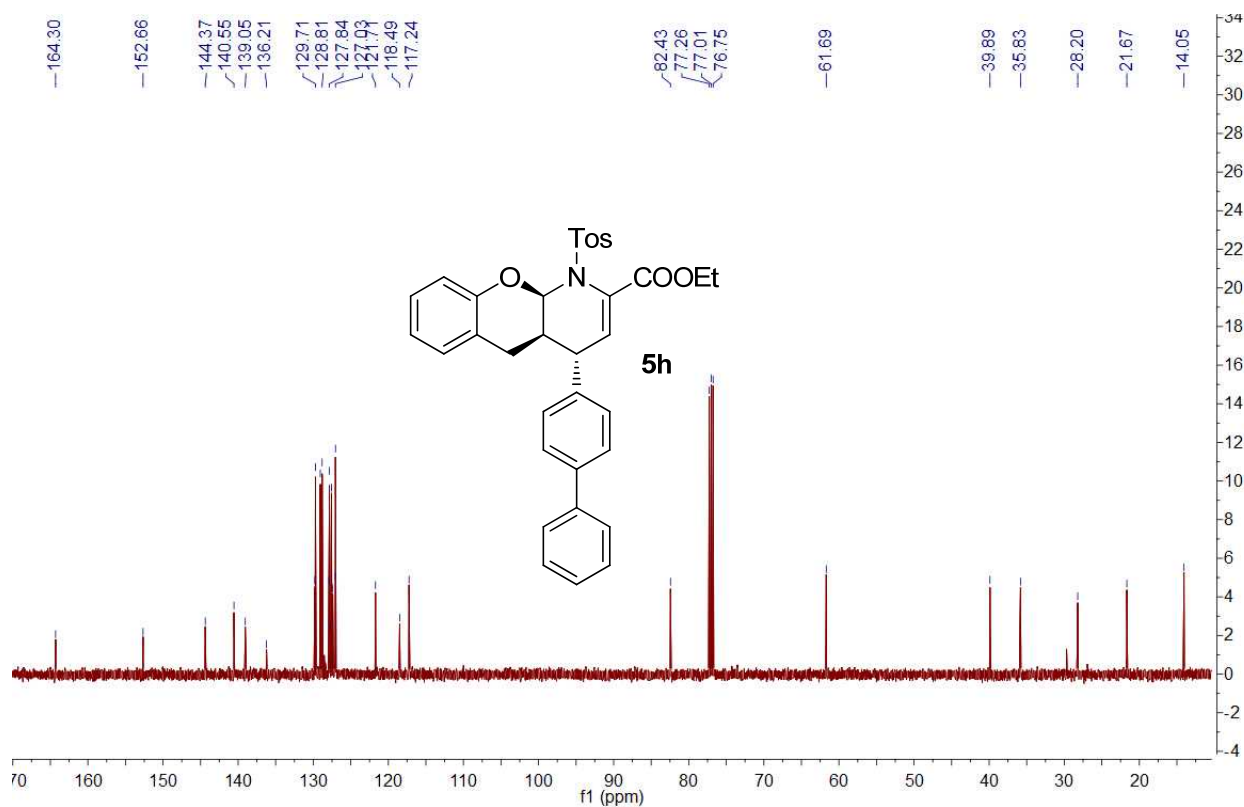

Chrom Type: Fixed WL Chromatogram, 210 nm

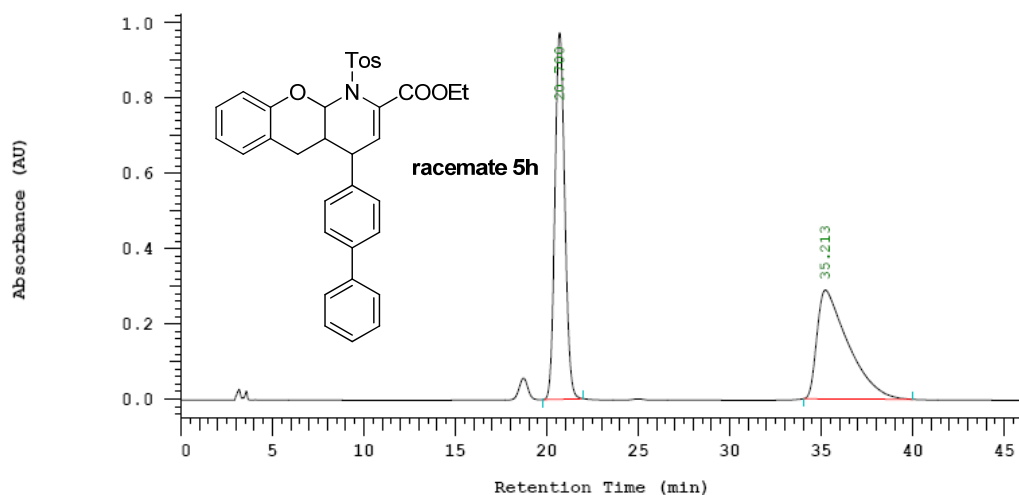

Chrom Type: Fixed WL Chromatogram, 210 nm

Peak Quantitation: AREA

Calculation Method: AREA%

| No. | RT     | Area     | Area %  | BC |
|-----|--------|----------|---------|----|
| 1   | 20.700 | 17961487 | 51.331  | BB |
| 2   | 35.213 | 17029859 | 48.669  | BB |
|     |        | 34991346 | 100.000 |    |

Chrom Type: Fixed WL Chromatogram, 210 nm

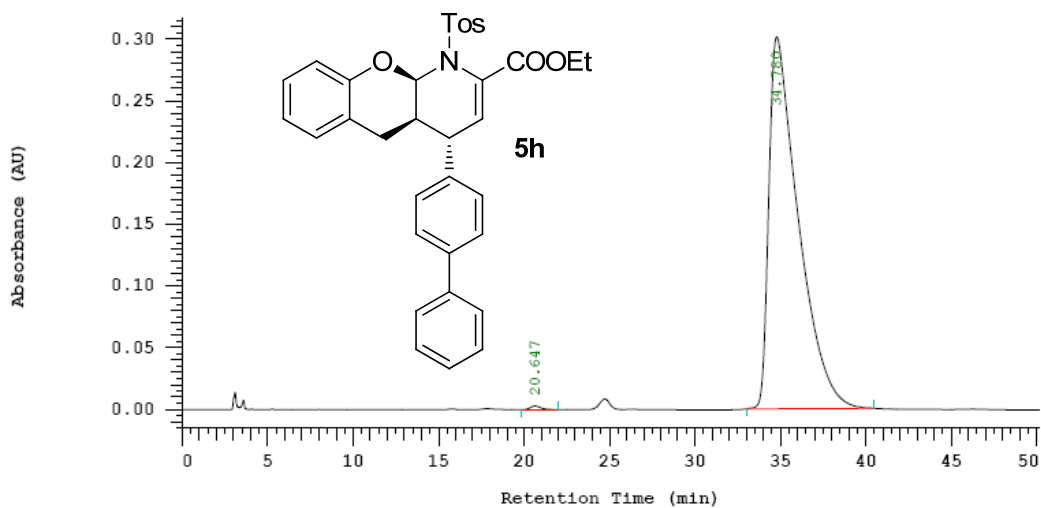

Chrom Type: Fixed WL Chromatogram, 210 nm

Peak Quantitation: AREA

Calculation Method: AREA%

| No. | RT     | Area     | Area %  | BC |
|-----|--------|----------|---------|----|
| 1   | 20.647 | 61132    | 0.340   | BB |
| 2   | 34.780 | 17929775 | 99.660  | BB |
|     |        | 17990907 | 100.000 |    |

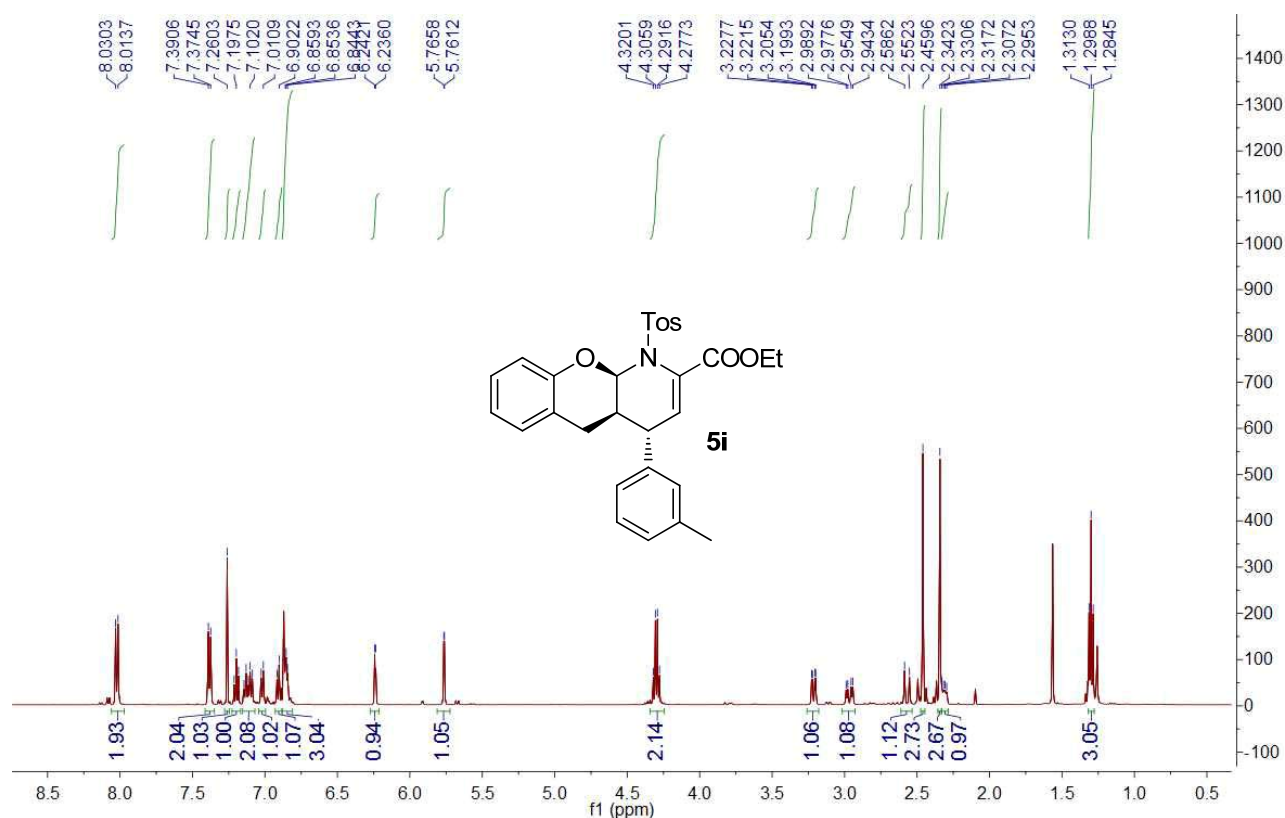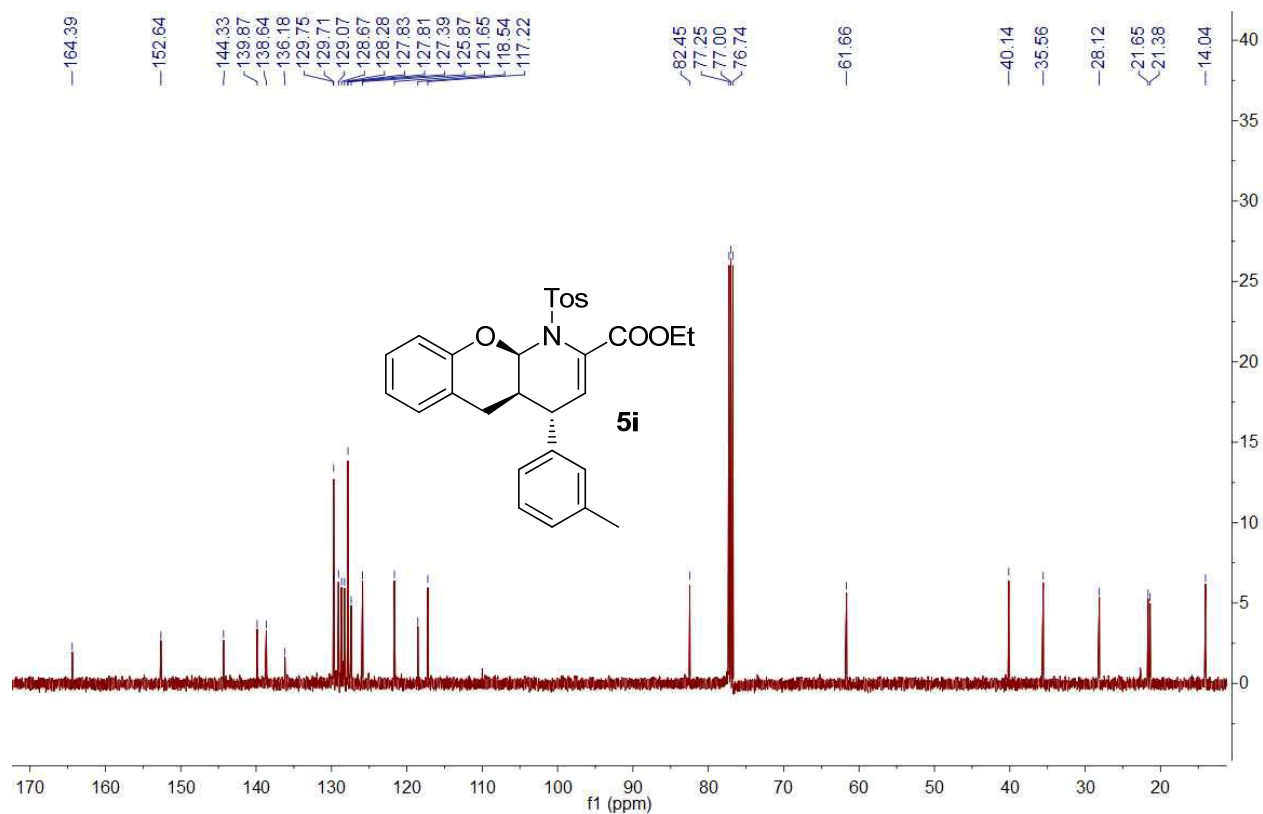

Chrom Type: Fixed WL Chromatogram, 210 nm

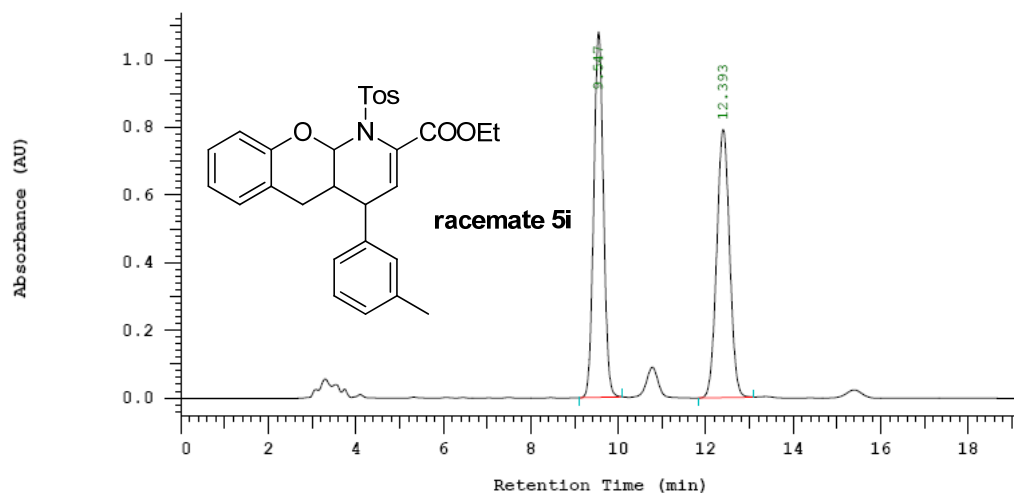

Chrom Type: Fixed WL Chromatogram, 210 nm

Peak Quantitation: AREA  
Calculation Method: AREA%

| No. | RT     | Area     | Area %  | BC |
|-----|--------|----------|---------|----|
| 1   | 9.547  | 8377948  | 50.848  | BB |
| 2   | 12.393 | 8098570  | 49.152  | BB |
|     |        | 16476518 | 100.000 |    |

Chrom Type: Fixed WL Chromatogram, 210 nm

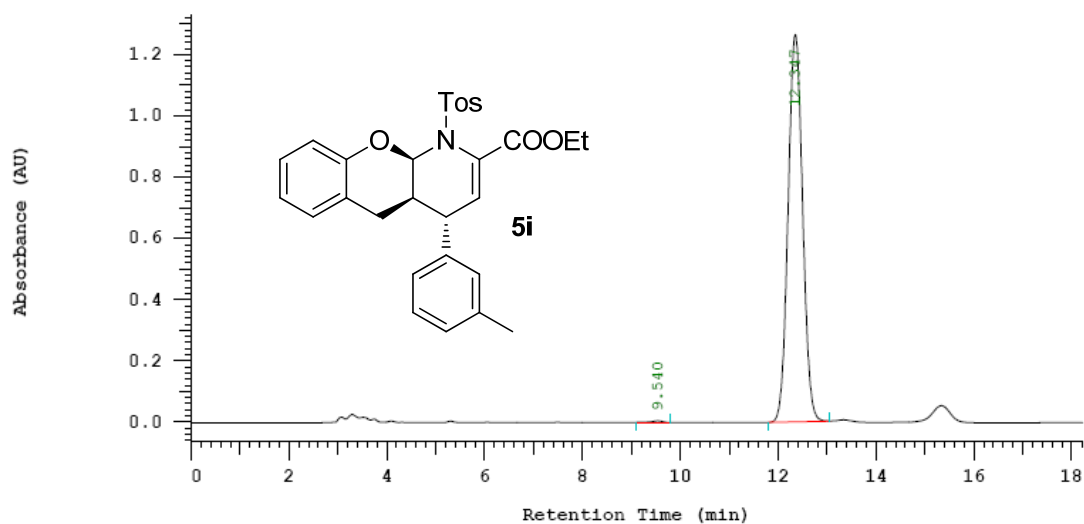

Chrom Type: Fixed WL Chromatogram, 210 nm

Peak Quantitation: AREA  
Calculation Method: AREA%

| No. | RT     | Area     | Area %  | BC |
|-----|--------|----------|---------|----|
| 1   | 9.540  | 39147    | 0.300   | BB |
| 2   | 12.347 | 13021592 | 99.700  | BB |
|     |        | 13060739 | 100.000 |    |

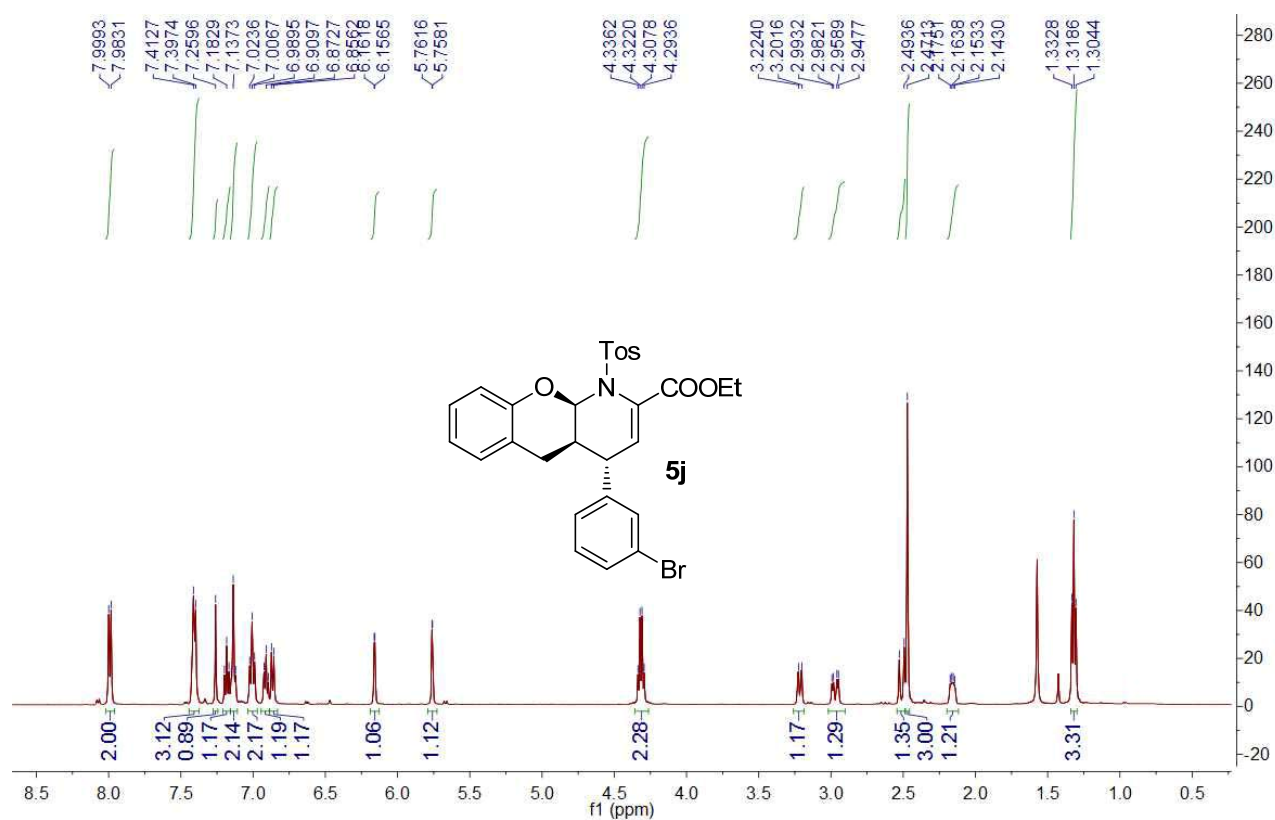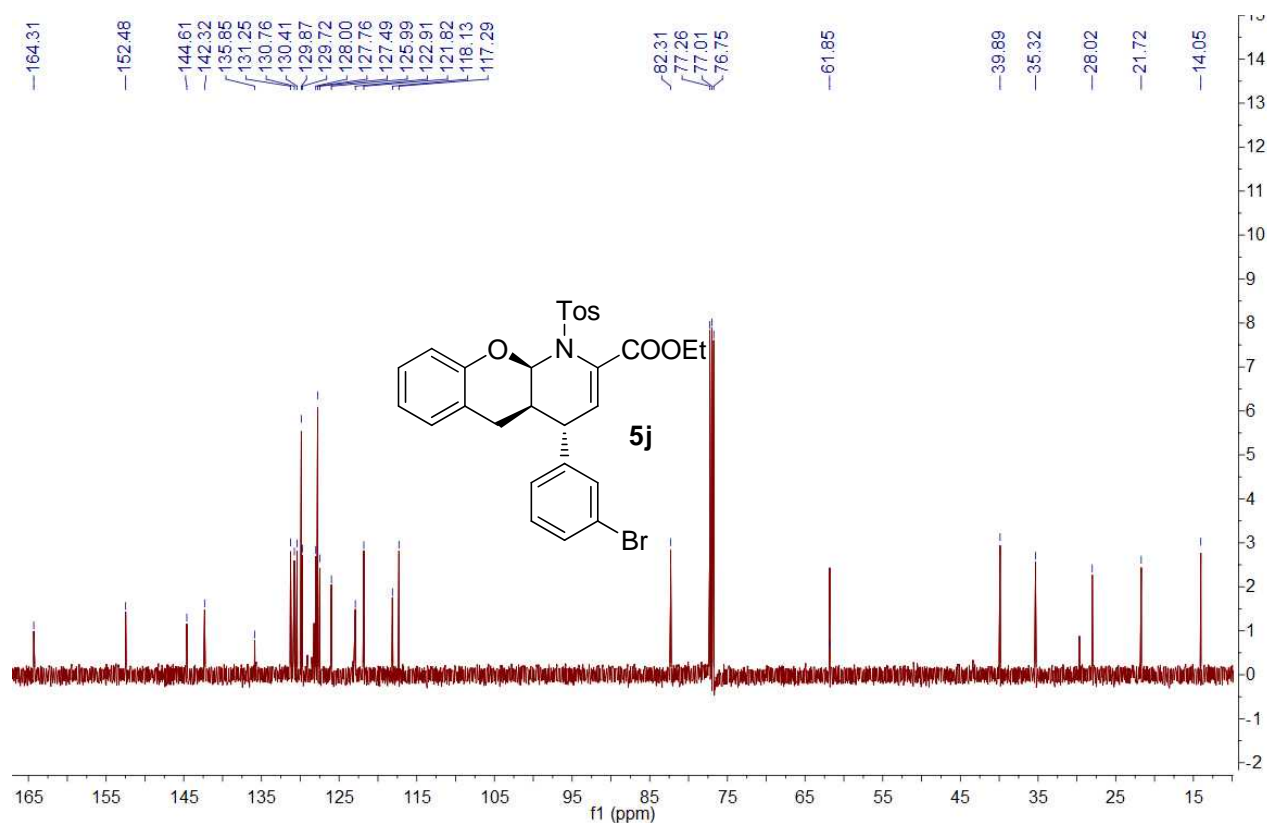

Chrom Type: Fixed WL Chromatogram, 210 nm

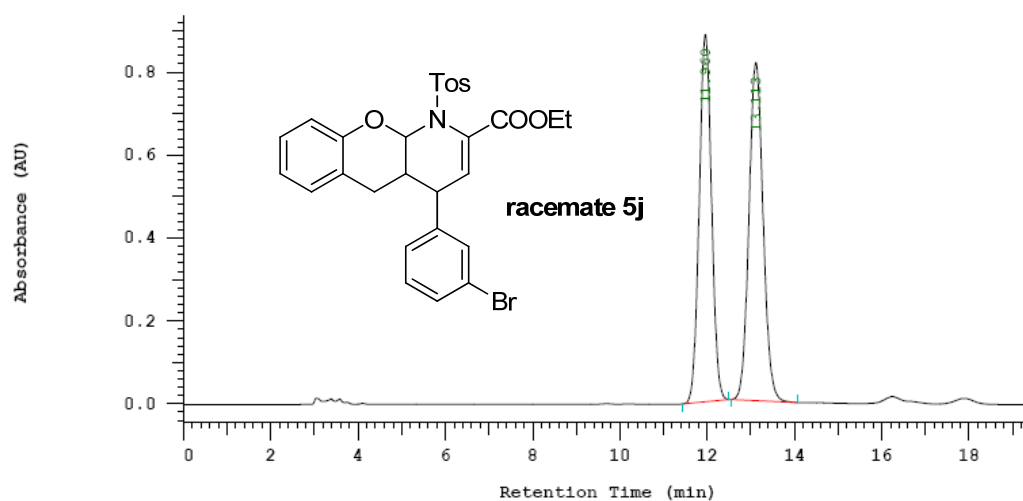

Chrom Type: Fixed WL Chromatogram, 210 nm

Peak Quantitation: AREA

Calculation Method: AREA%

| No. | RT     | Area     | Area %  | BC |
|-----|--------|----------|---------|----|
| 1   | 11.960 | 8695428  | 48.542  | BB |
| 2   | 13.113 | 9217805  | 51.458  | BB |
|     |        | 17913233 | 100.000 |    |

Chrom Type: Fixed WL Chromatogram, 210 nm

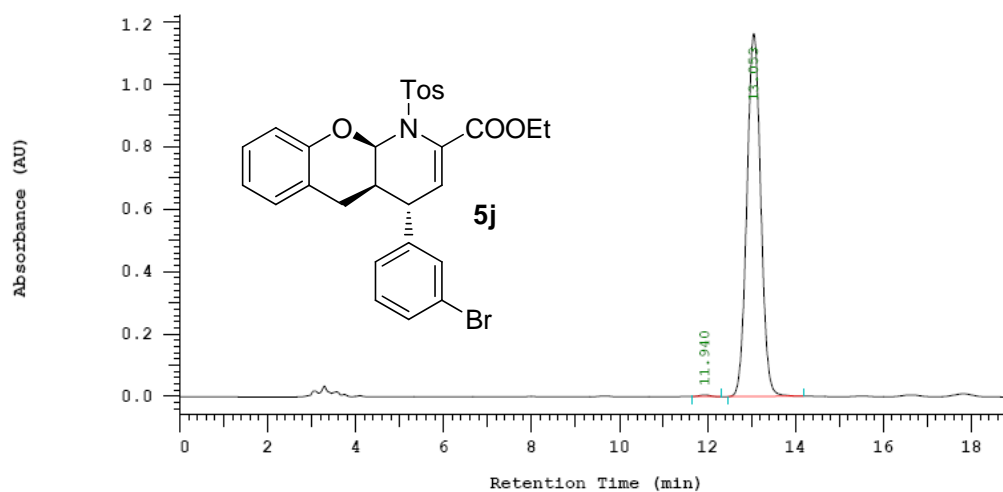

Chrom Type: Fixed WL Chromatogram, 210 nm

Peak Quantitation: AREA

Calculation Method: AREA%

| No. | RT     | Area     | Area %  | BC |
|-----|--------|----------|---------|----|
| 1   | 11.940 | 37103    | 0.291   | BB |
| 2   | 13.053 | 12703985 | 99.709  | BB |
|     |        | 12741088 | 100.000 |    |

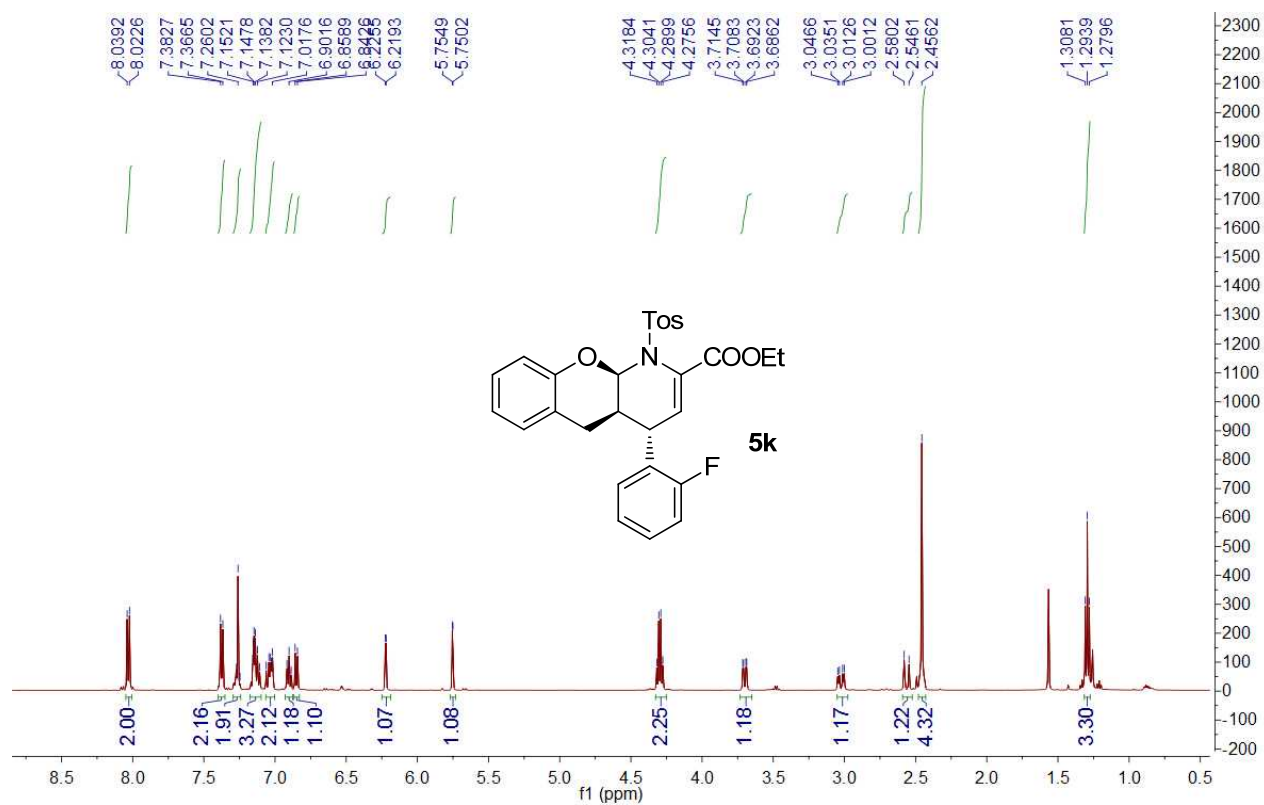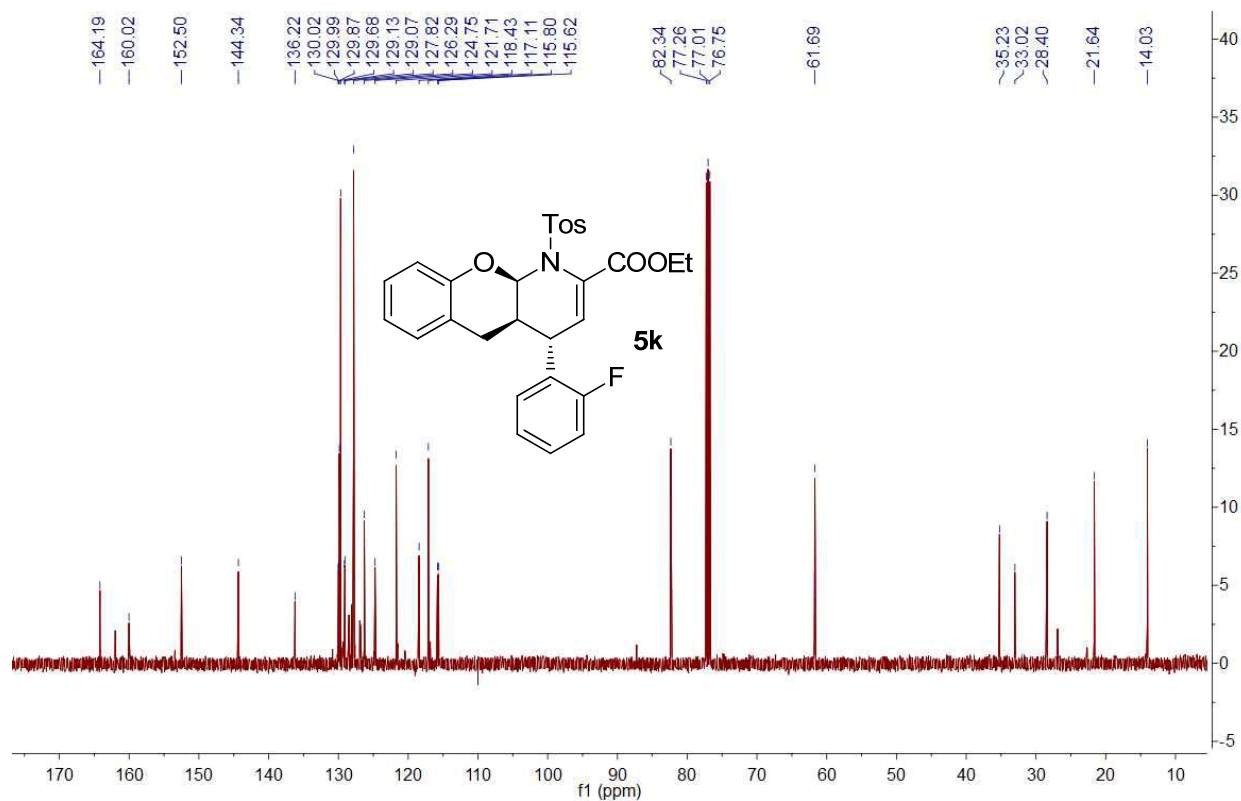

Chrom Type: Fixed WL Chromatogram, 210 nm

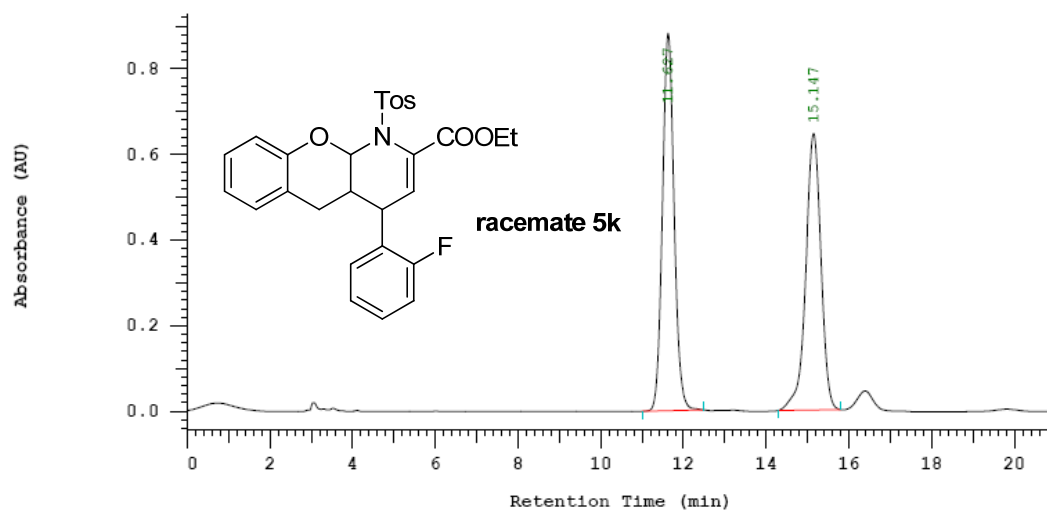

Chrom Type: Fixed WL Chromatogram, 210 nm

Peak Quantitation: AREA

Calculation Method: AREA%

| No. | RT     | Area     | Area %  | BC |
|-----|--------|----------|---------|----|
| 1   | 11.627 | 8642020  | 51.124  | BB |
| 2   | 15.147 | 8262076  | 48.876  | BB |
|     |        | 16904096 | 100.000 |    |

Chrom Type: Fixed WL Chromatogram, 210 nm

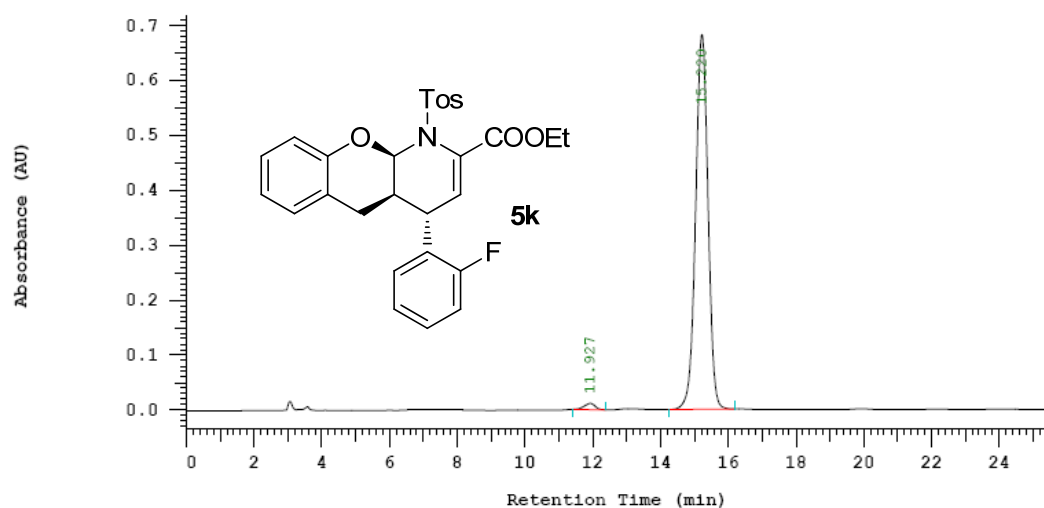

Chrom Type: Fixed WL Chromatogram, 210 nm

Peak Quantitation: AREA

Calculation Method: AREA%

| No. | RT     | Area    | Area %  | BC |
|-----|--------|---------|---------|----|
| 1   | 11.927 | 123101  | 1.405   | BB |
| 2   | 15.220 | 8637157 | 98.595  | BB |
|     |        | 8760258 | 100.000 |    |

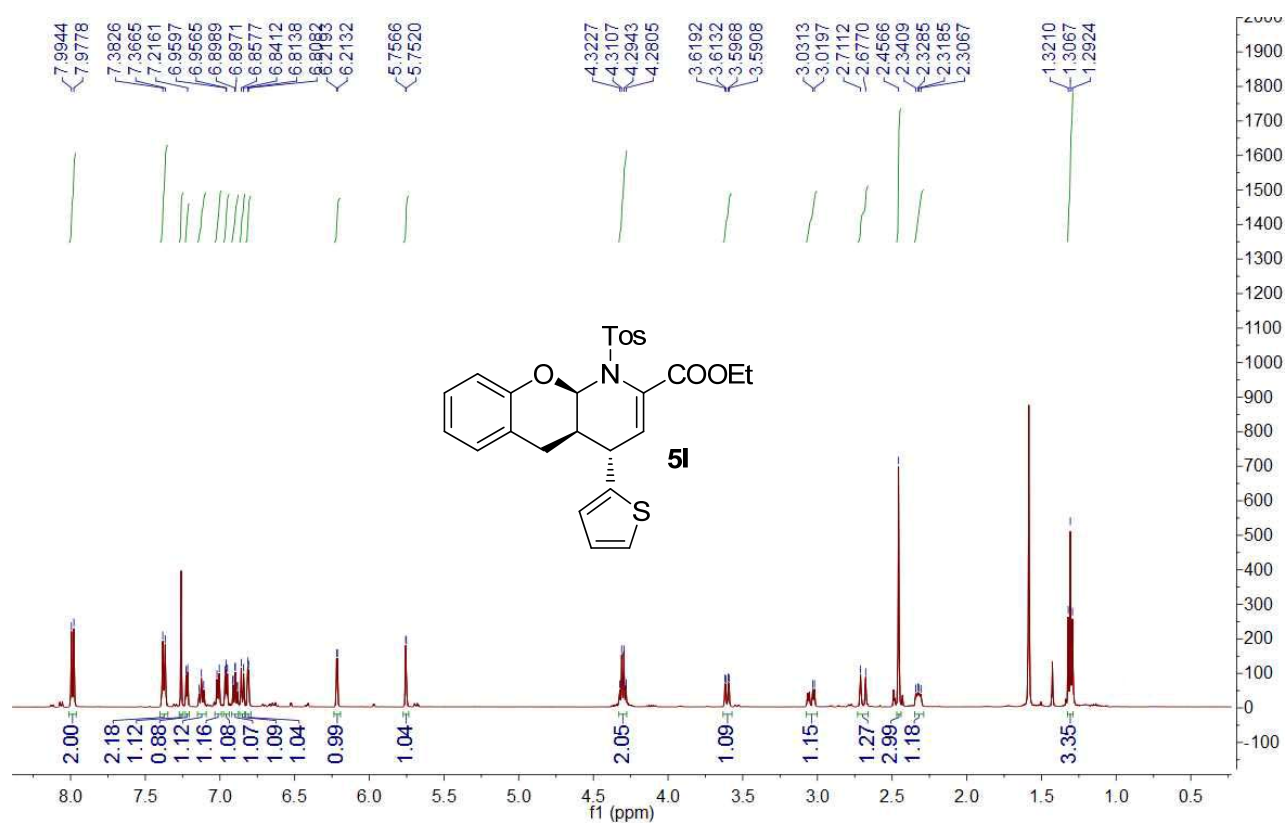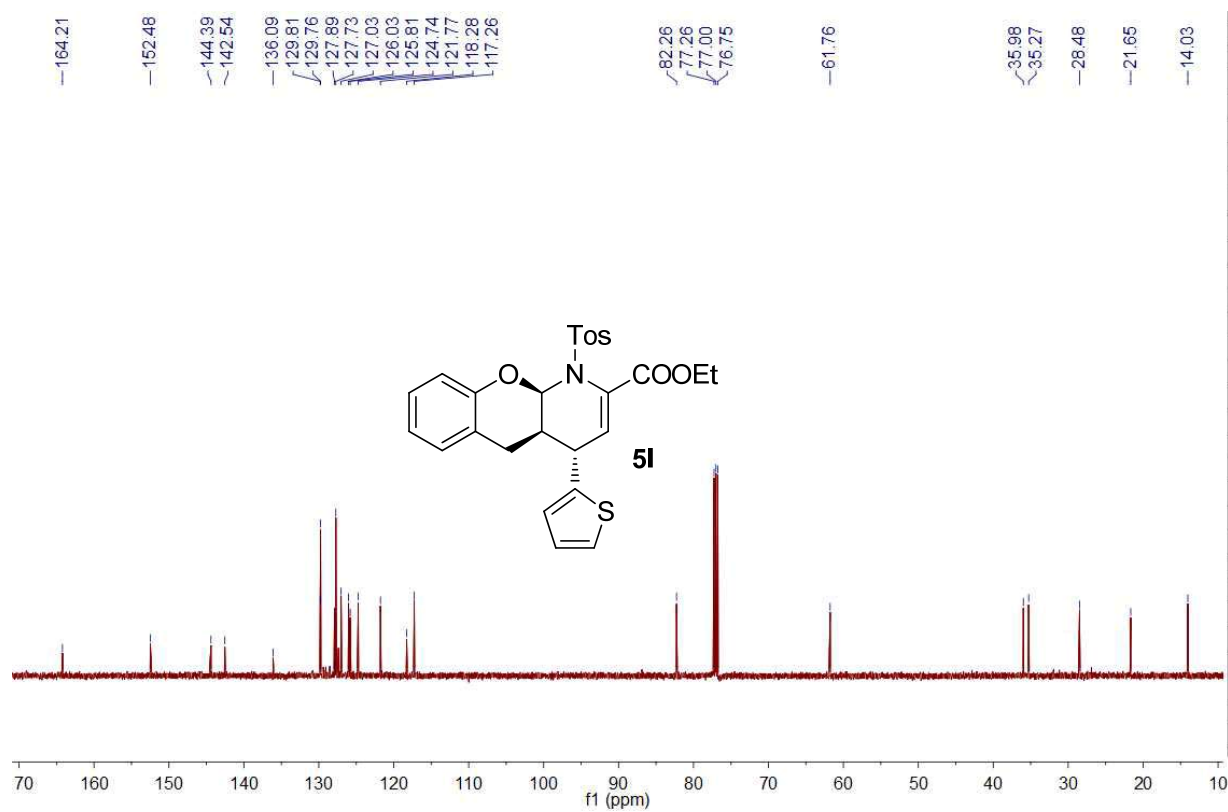

Chrom Type: Fixed WL Chromatogram, 210 nm

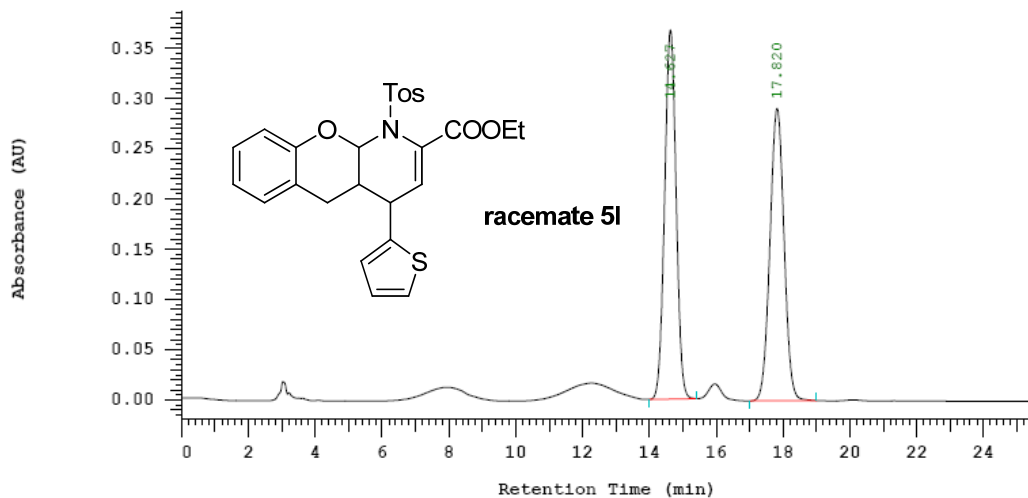

Chrom Type: Fixed WL Chromatogram, 210 nm

Peak Quantitation: AREA  
Calculation Method: AREA%

| No. | RT     | Area    | Area %  | BC |
|-----|--------|---------|---------|----|
| 1   | 14.627 | 4347463 | 50.629  | BB |
| 2   | 17.820 | 4239375 | 49.371  | BB |
|     |        | 8586838 | 100.000 |    |

Chrom Type: Fixed WL Chromatogram, 210 nm

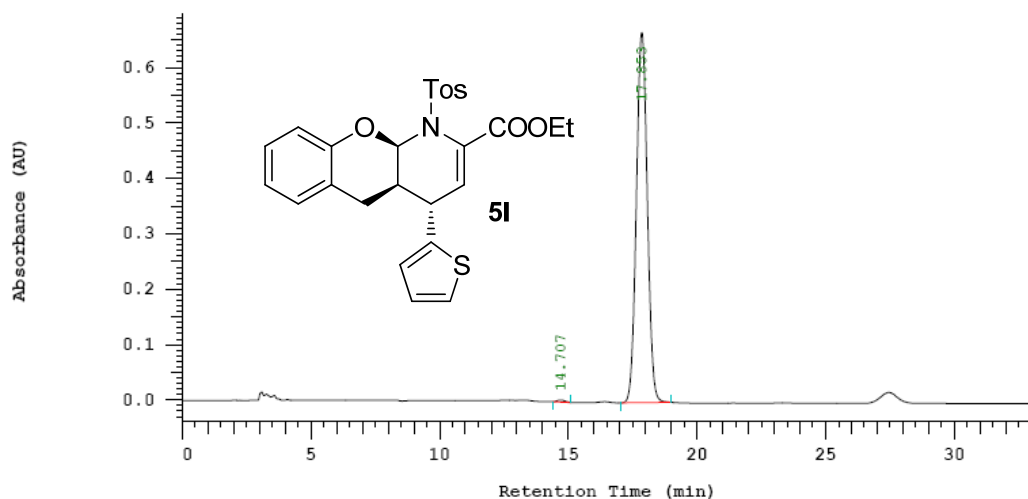

Chrom Type: Fixed WL Chromatogram, 210 nm

Peak Quantitation: AREA  
Calculation Method: AREA%

| No. | RT     | Area    | Area %  | BC |
|-----|--------|---------|---------|----|
| 1   | 14.707 | 38343   | 0.391   | BB |
| 2   | 17.853 | 9766532 | 99.609  | BB |
|     |        | 9804875 | 100.000 |    |

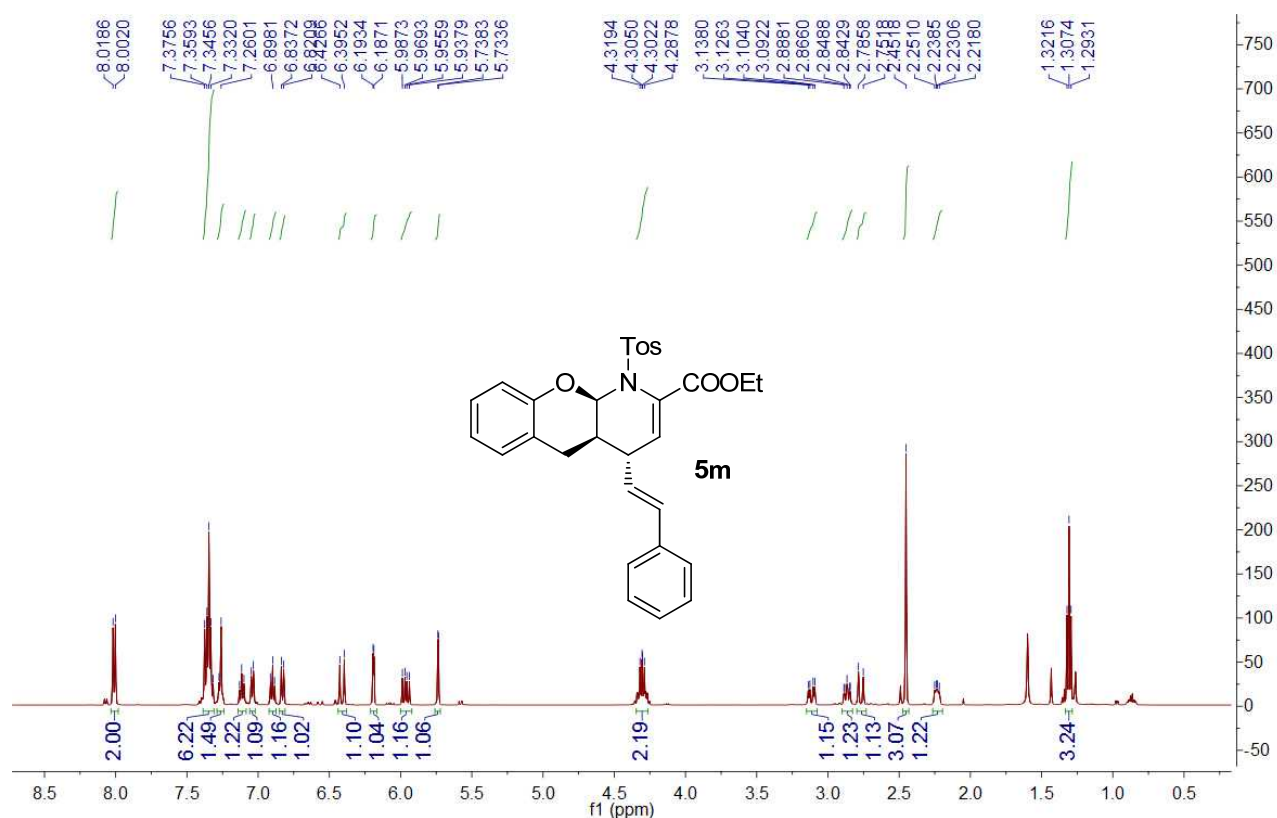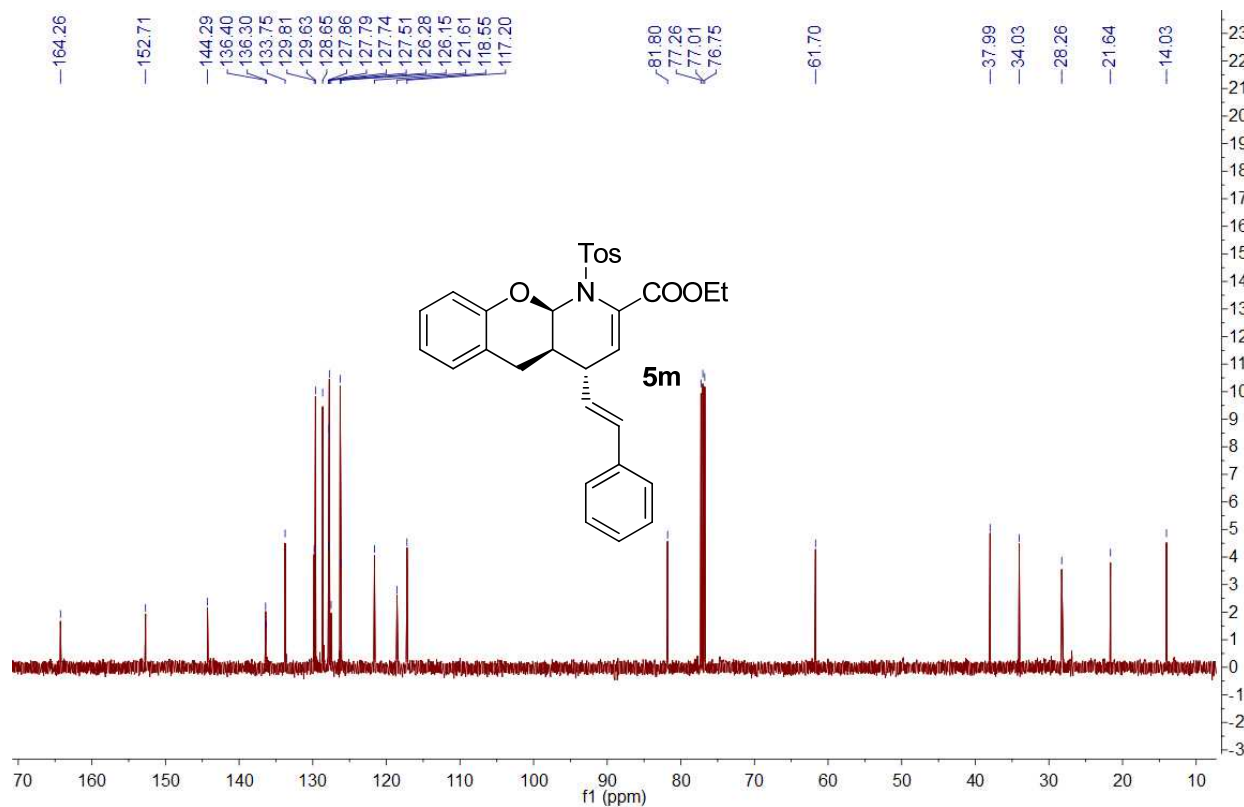

Chrom Type: Fixed WL Chromatogram, 210 nm

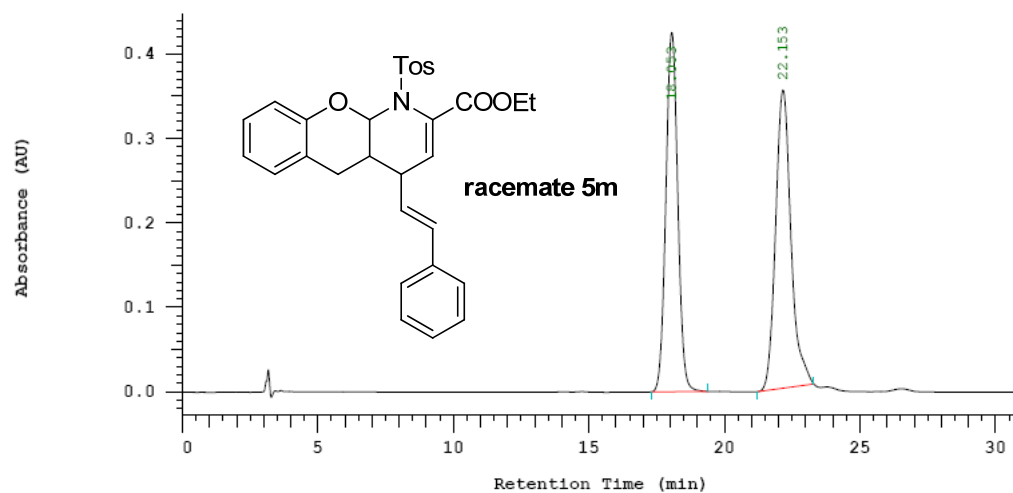

Chrom Type: Fixed WL Chromatogram, 210 nm

Peak Quantitation: AREA

Calculation Method: AREA%

| No. | RT     | Area     | Area %  | BC |
|-----|--------|----------|---------|----|
| 1   | 18.053 | 6426009  | 47.998  | BB |
| 2   | 22.153 | 6962140  | 52.002  | BB |
|     |        | 13388149 | 100.000 |    |

Chrom Type: Fixed WL Chromatogram, 210 nm

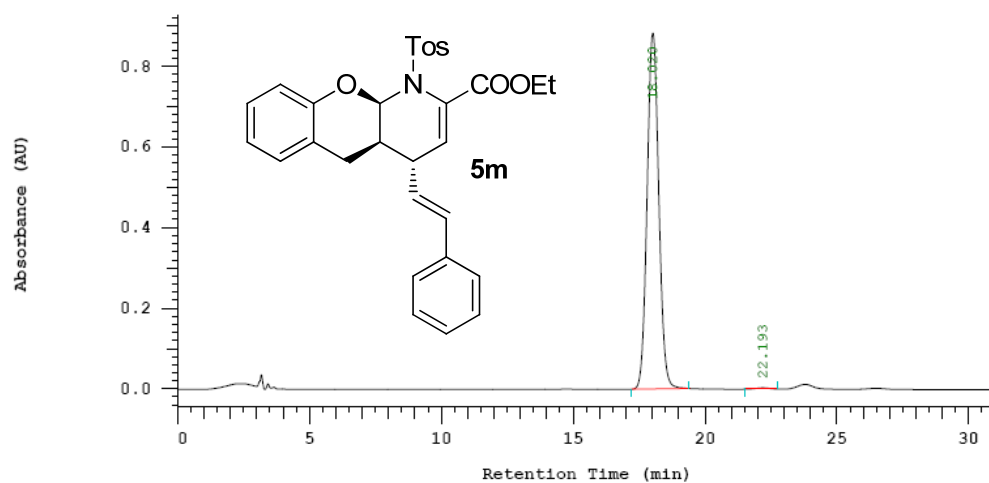

Chrom Type: Fixed WL Chromatogram, 210 nm

Peak Quantitation: AREA

Calculation Method: AREA%

| No. | RT     | Area     | Area %  | BC |
|-----|--------|----------|---------|----|
| 1   | 18.020 | 13369424 | 99.664  | BB |
| 2   | 22.193 | 45103    | 0.336   | BB |
|     |        | 13414527 | 100.000 |    |

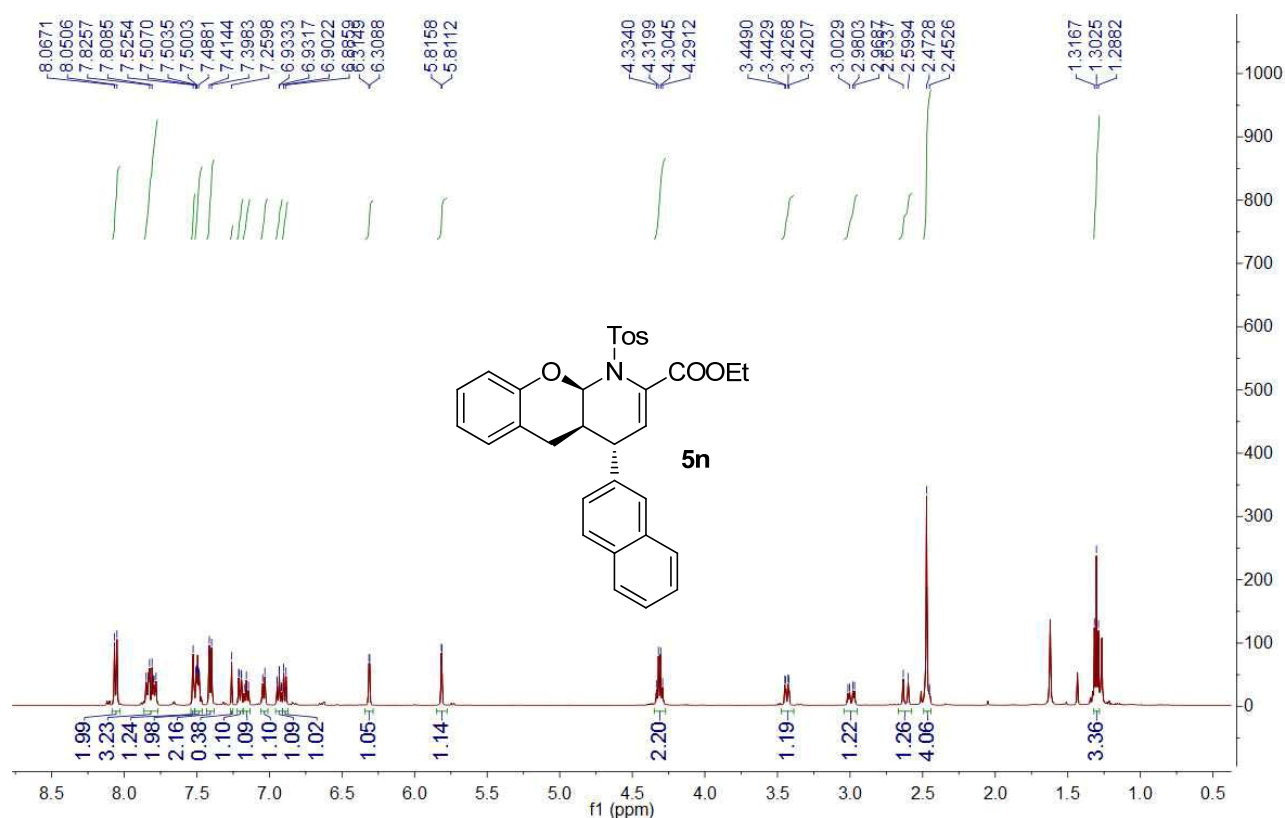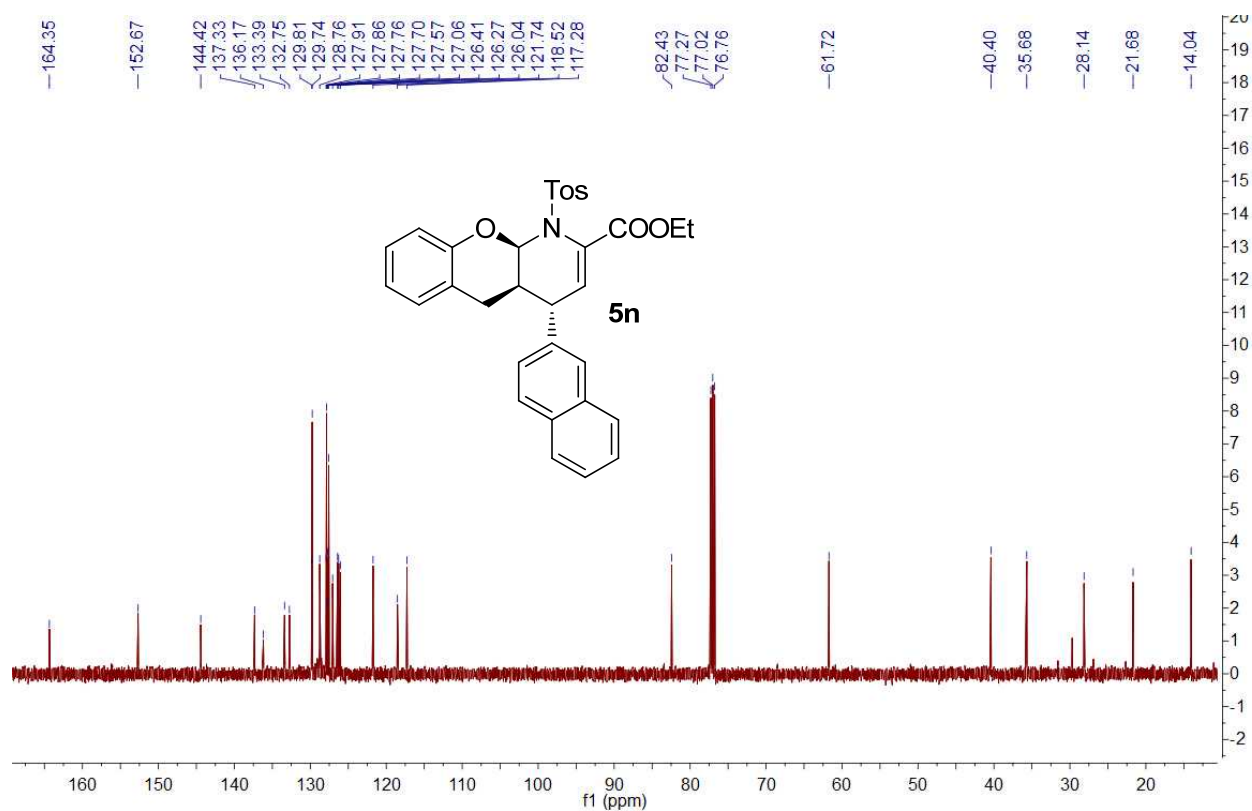

Chrom Type: Fixed WL Chromatogram, 210 nm

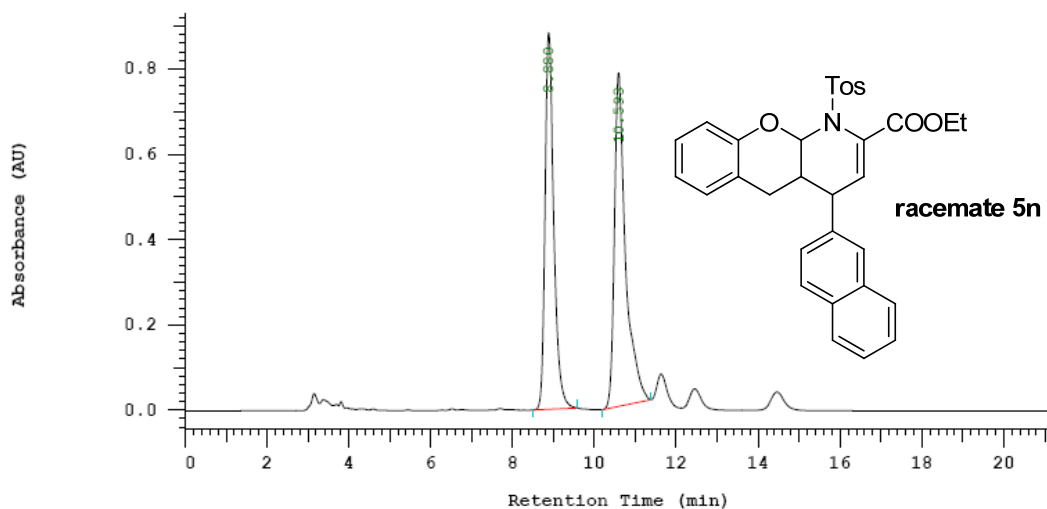

Chrom Type: Fixed WL Chromatogram, 210 nm

Peak Quantitation: AREA  
Calculation Method: AREA%

| No. | RT     | Area     | Area %  | BC |
|-----|--------|----------|---------|----|
| 1   | 8.880  | 6519772  | 46.596  | BB |
| 2   | 10.593 | 7472288  | 53.404  | BB |
|     |        | 13992060 | 100.000 |    |

Chrom Type: Fixed WL Chromatogram, 210 nm

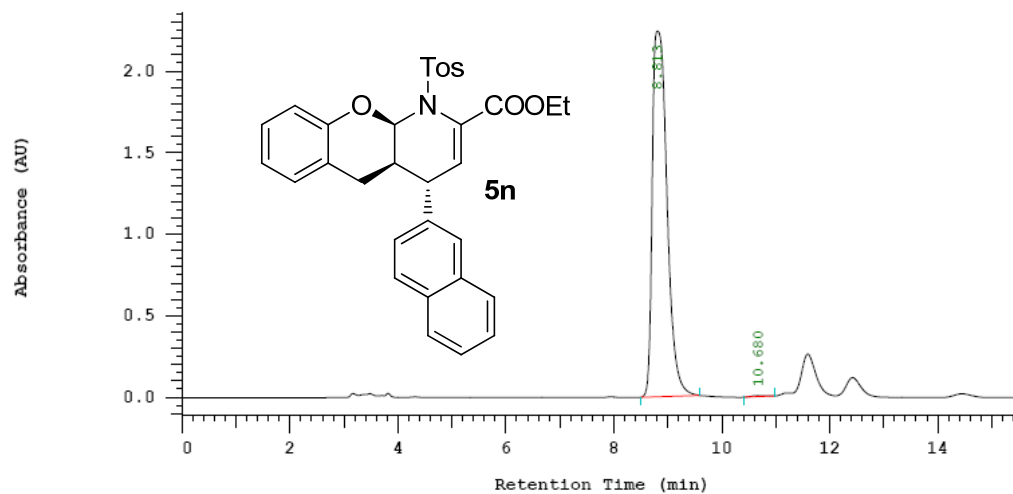

Chrom Type: Fixed WL Chromatogram, 210 nm

Peak Quantitation: AREA  
Calculation Method: AREA%

| No. | RT     | Area     | Area %  | BC |
|-----|--------|----------|---------|----|
| 1   | 8.813  | 21204568 | 99.741  | BB |
| 2   | 10.680 | 55010    | 0.259   | BB |
|     |        | 21259578 | 100.000 |    |

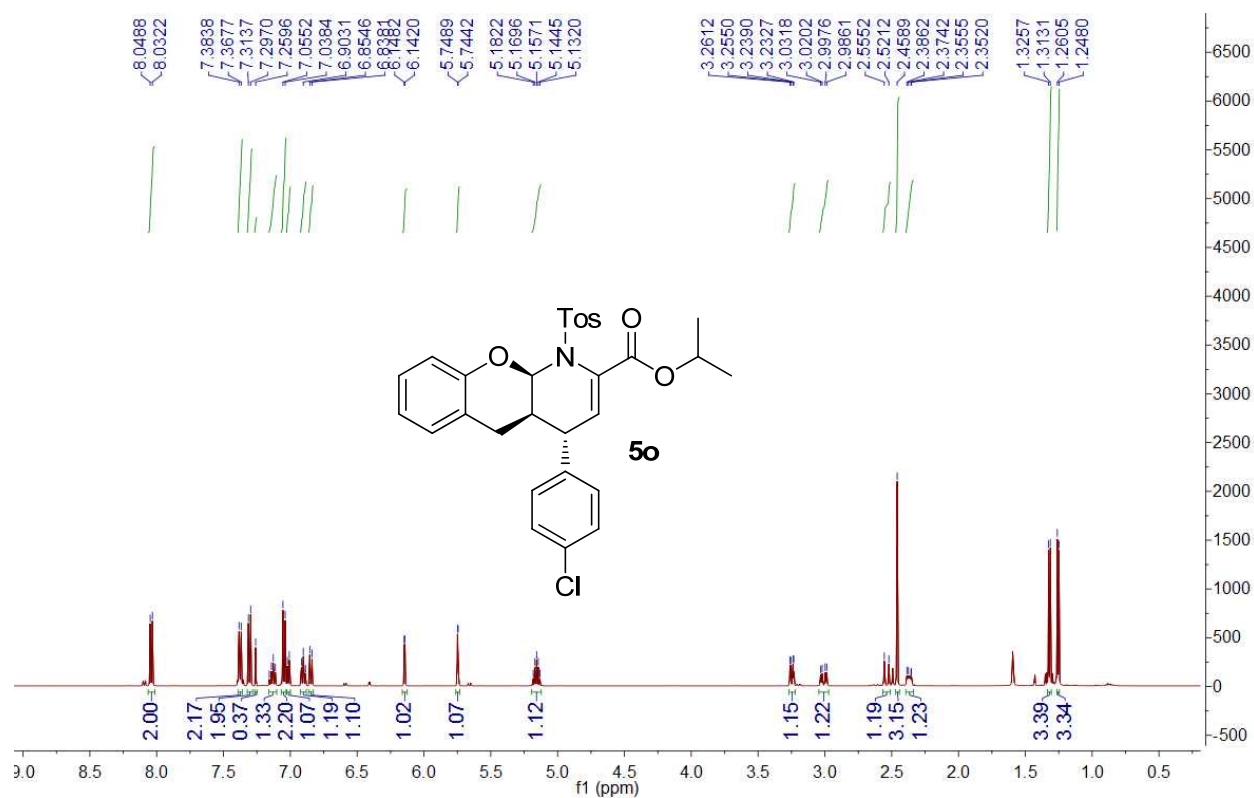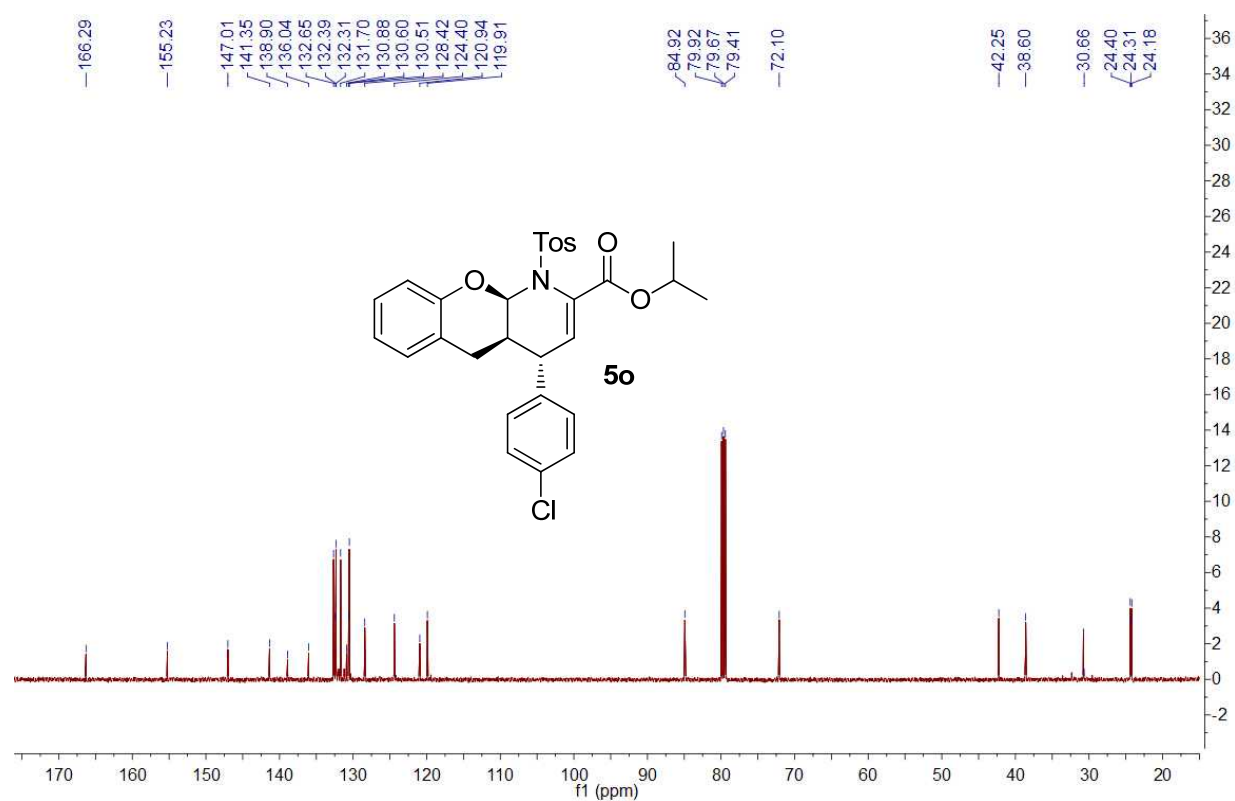

Chrom Type: Fixed WL Chromatogram, 210 nm

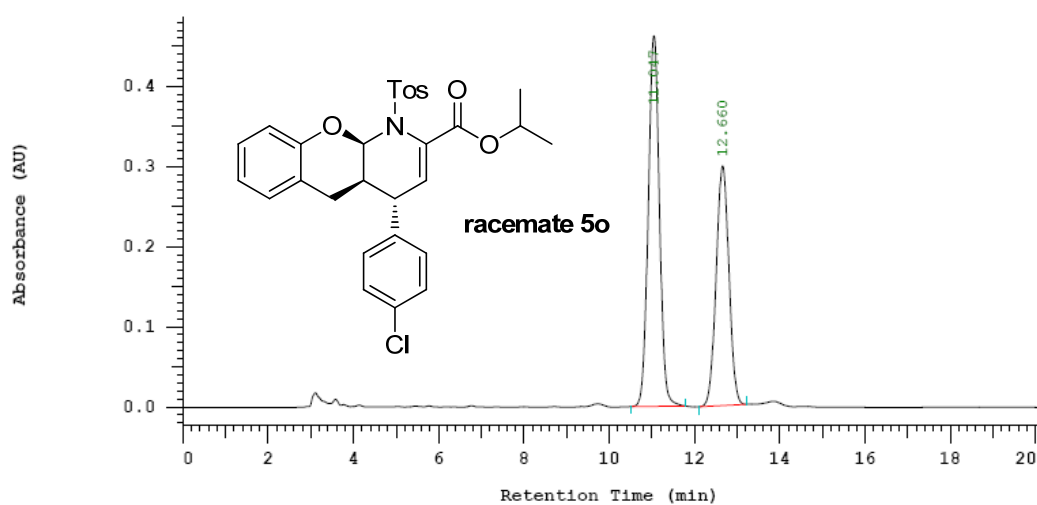

Chrom Type: Fixed WL Chromatogram, 210 nm

Peak Quantitation: AREA  
Calculation Method: AREA%

| No. | RT     | Area    | Area %  | BC |
|-----|--------|---------|---------|----|
| 1   | 11.047 | 4230106 | 57.679  | BB |
| 2   | 12.660 | 3103770 | 42.321  | BB |
|     |        | 7333876 | 100.000 |    |

Chrom Type: Fixed WL Chromatogram, 210 nm

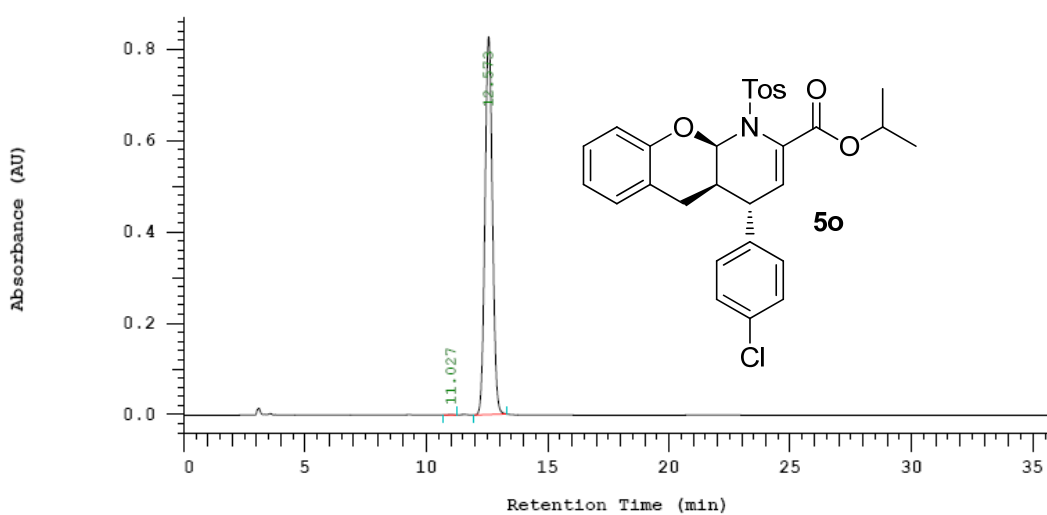

Chrom Type: Fixed WL Chromatogram, 210 nm

Peak Quantitation: AREA  
Calculation Method: AREA%

| No. | RT     | Area    | Area %  | BC |
|-----|--------|---------|---------|----|
| 1   | 11.027 | 9209    | 0.106   | BB |
| 2   | 12.573 | 8704617 | 99.894  | BB |
|     |        | 8713826 | 100.000 |    |

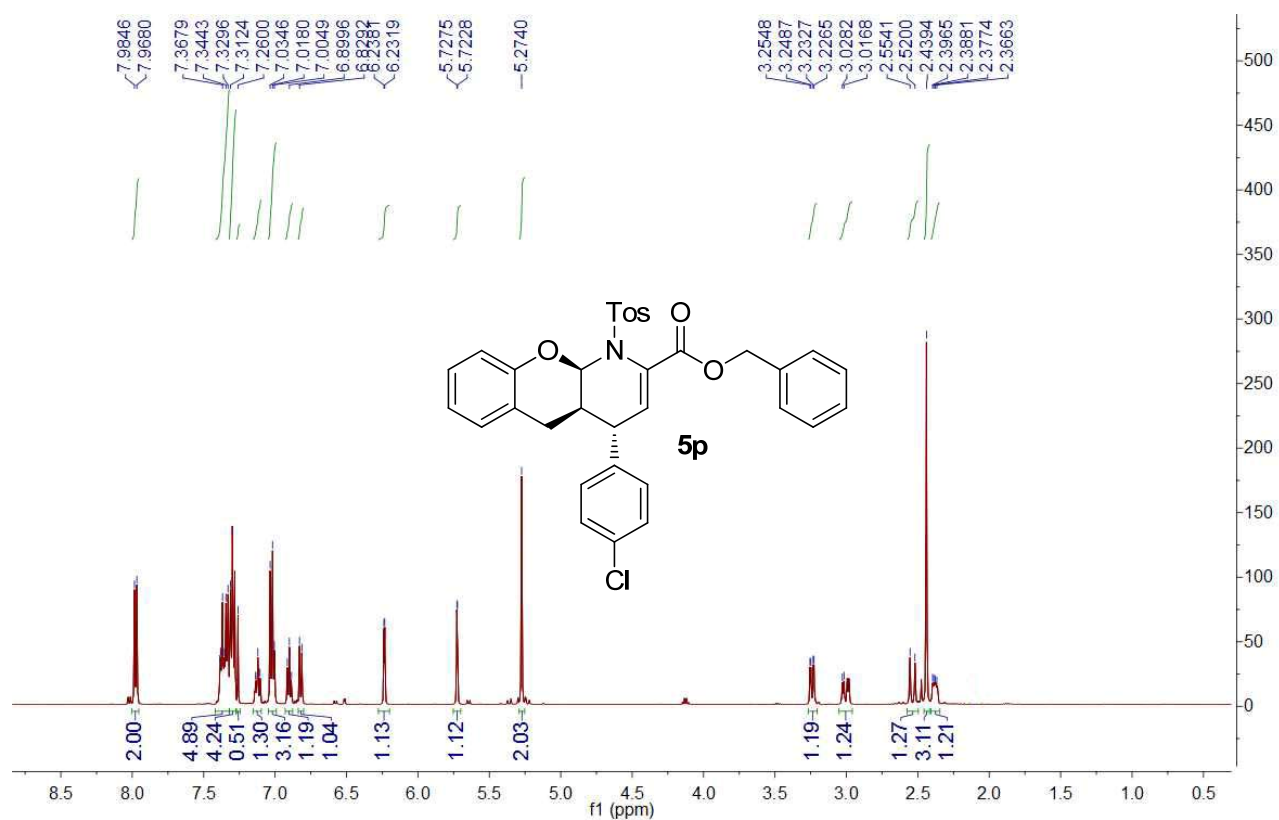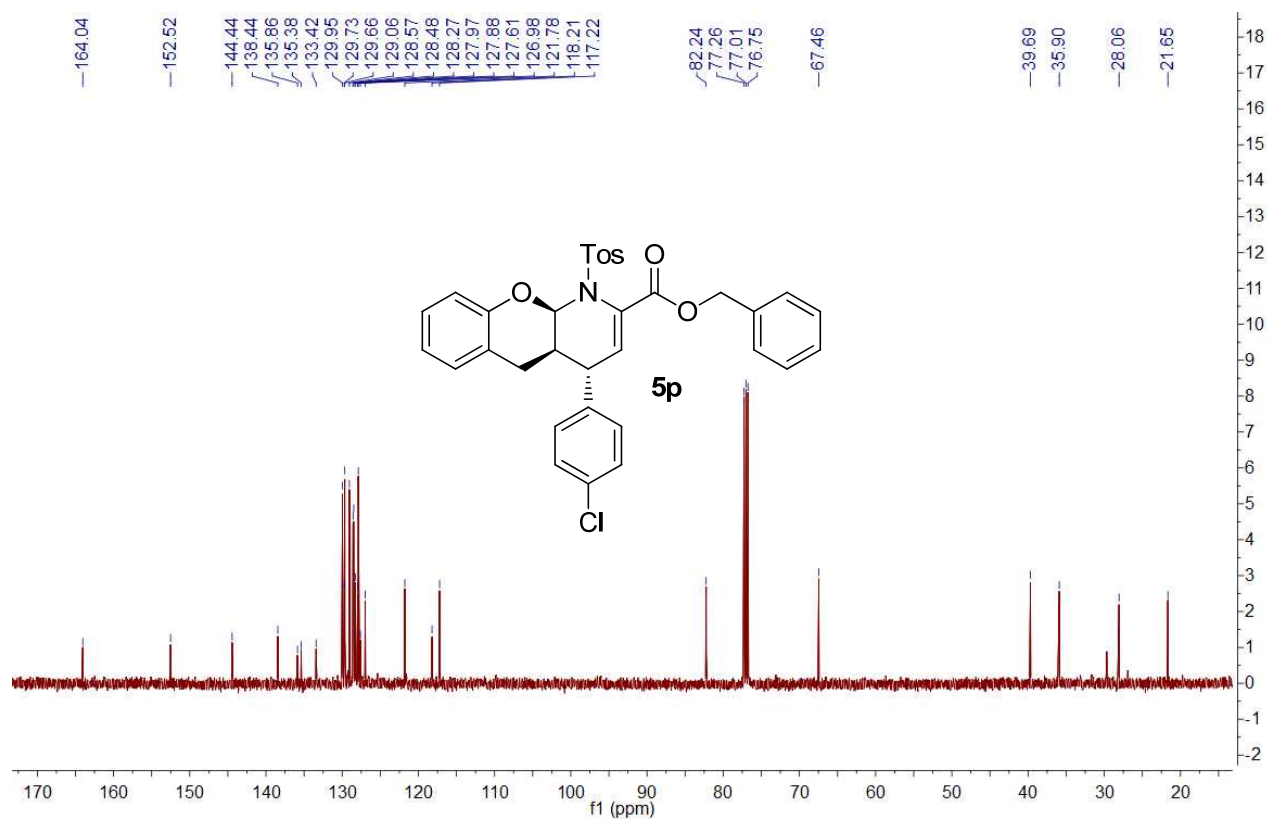

Chrom Type: Fixed WL Chromatogram, 210 nm

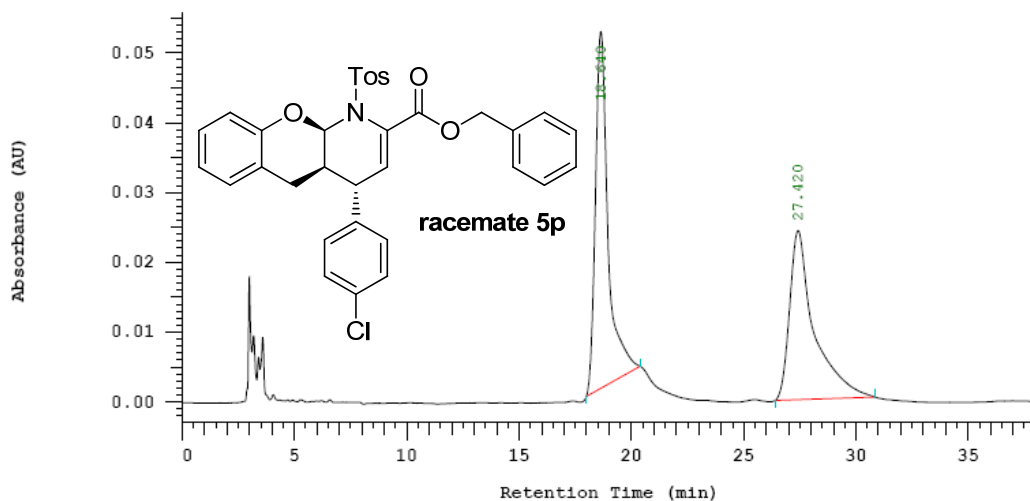

Chrom Type: Fixed WL Chromatogram, 210 nm

Peak Quantitation: AREA

Calculation Method: AREA%

| No. | RT     | Area    | Area %  | BC |
|-----|--------|---------|---------|----|
| 1   | 18.640 | 992879  | 52.017  | BB |
| 2   | 27.420 | 915882  | 47.983  | BB |
|     |        | 1908761 | 100.000 |    |

Chrom Type: Fixed WL Chromatogram, 210 nm

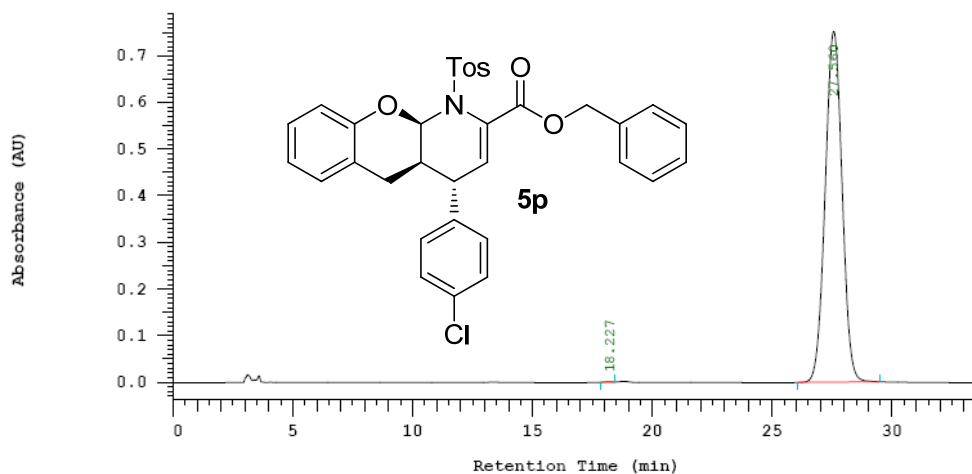

Chrom Type: Fixed WL Chromatogram, 210 nm

Peak Quantitation: AREA

Calculation Method: AREA%

| No. | RT     | Area     | Area %  | BC |
|-----|--------|----------|---------|----|
| 1   | 18.227 | 5342     | 0.029   | BB |
| 2   | 27.560 | 18339617 | 99.971  | BB |
|     |        | 18344959 | 100.000 |    |

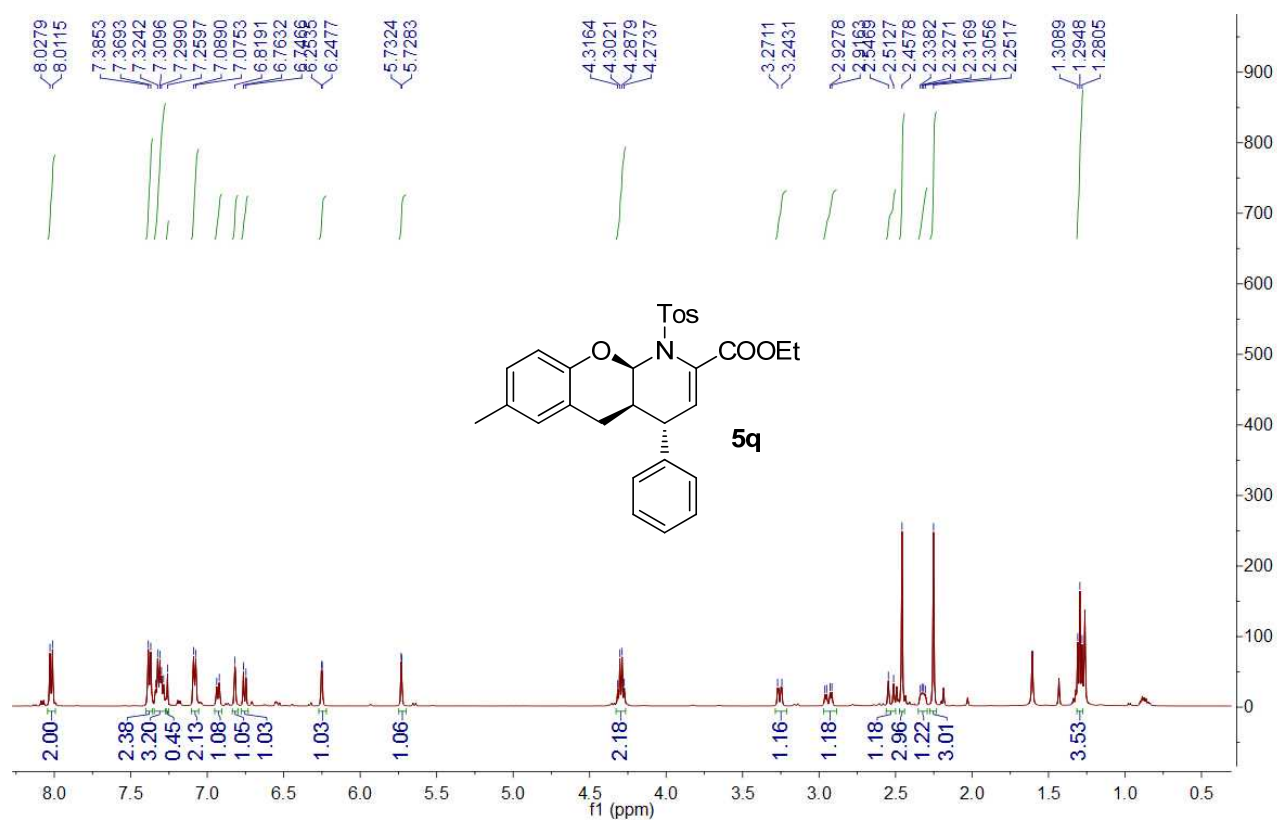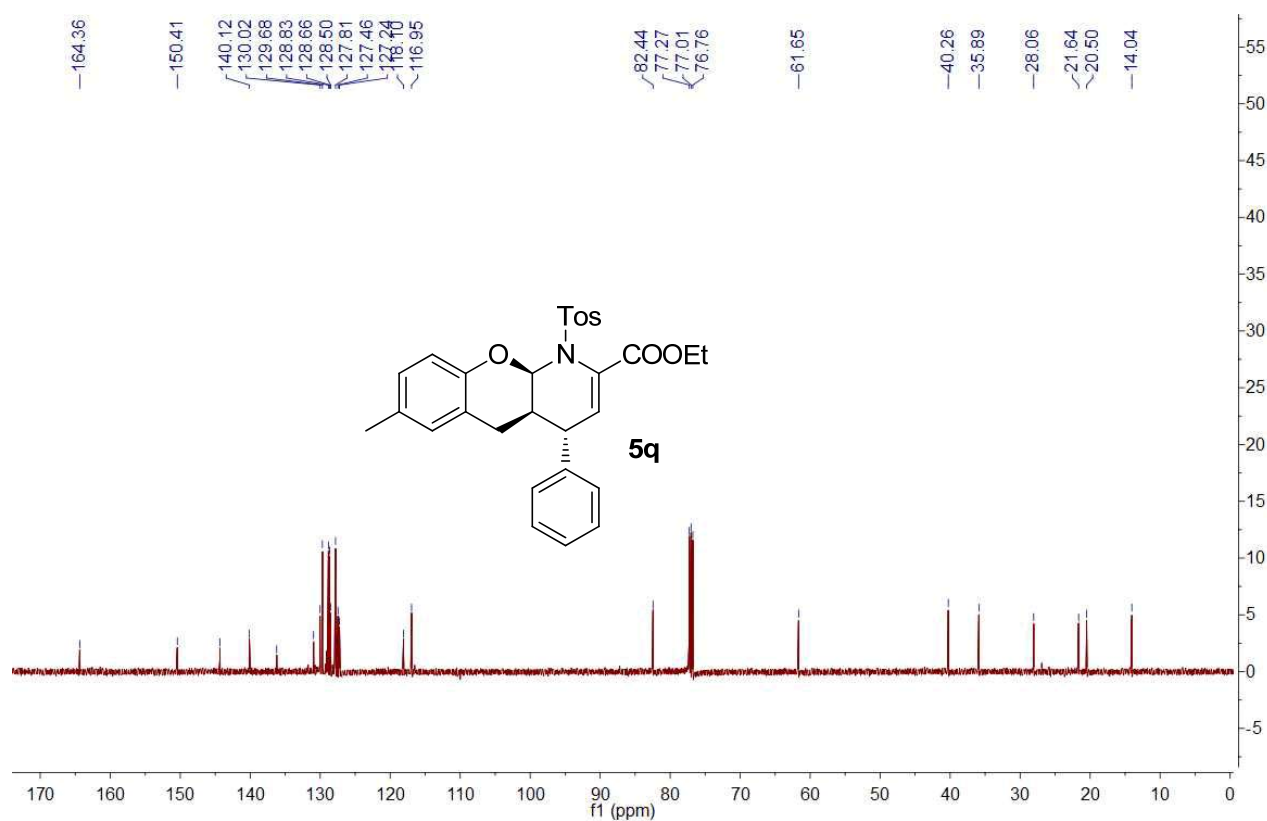

Chrom Type: Fixed WL Chromatogram, 210 nm

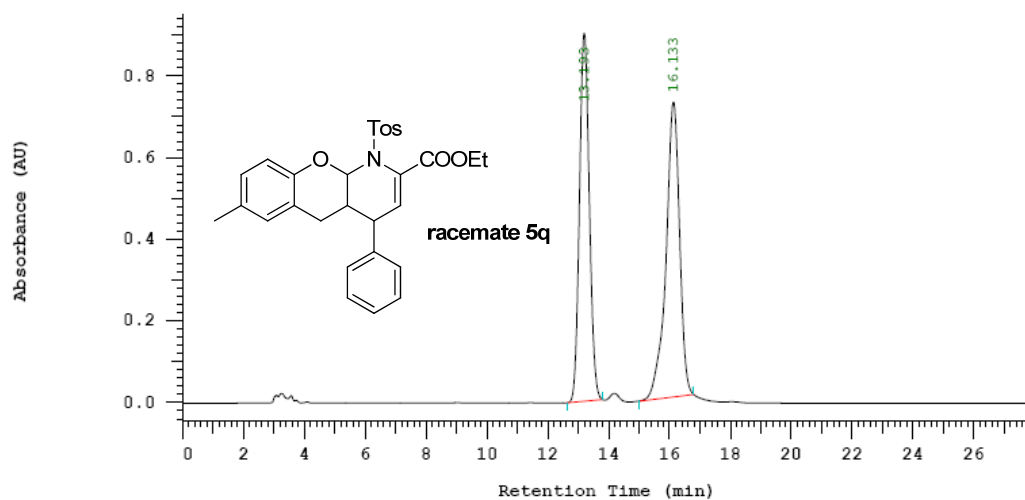

Chrom Type: Fixed WL Chromatogram, 210 nm

Peak Quantitation: AREA  
Calculation Method: AREA%

| No. | RT     | Area     | Area %  | BC |
|-----|--------|----------|---------|----|
| 1   | 13.193 | 10029798 | 47.407  | BB |
| 2   | 16.133 | 11127019 | 52.593  | BB |
|     |        | 21156817 | 100.000 |    |

Chrom Type: Fixed WL Chromatogram, 210 nm

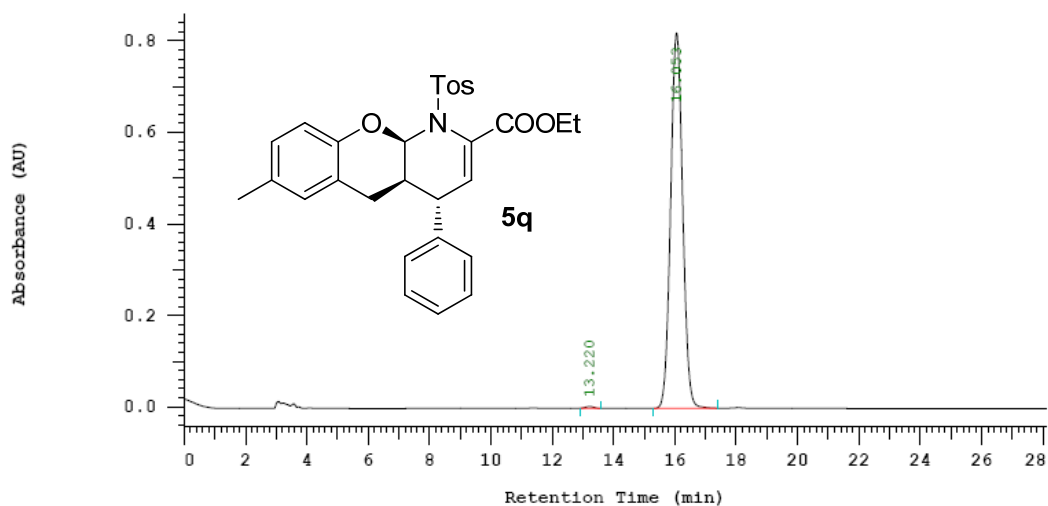

Chrom Type: Fixed WL Chromatogram, 210 nm

Peak Quantitation: AREA  
Calculation Method: AREA%

| No. | RT     | Area     | Area %  | BC |
|-----|--------|----------|---------|----|
| 1   | 13.220 | 34406    | 0.309   | BB |
| 2   | 16.053 | 11086575 | 99.691  | BB |
|     |        | 11120981 | 100.000 |    |

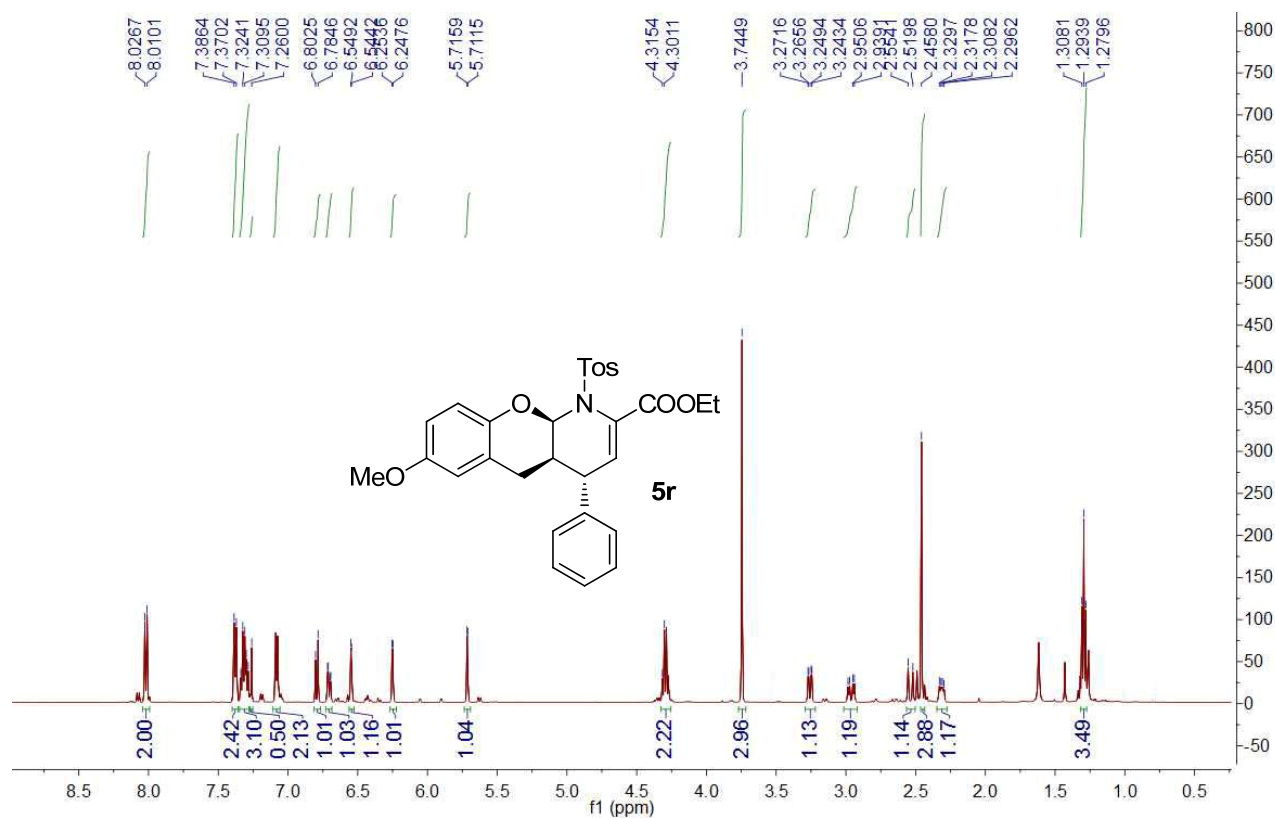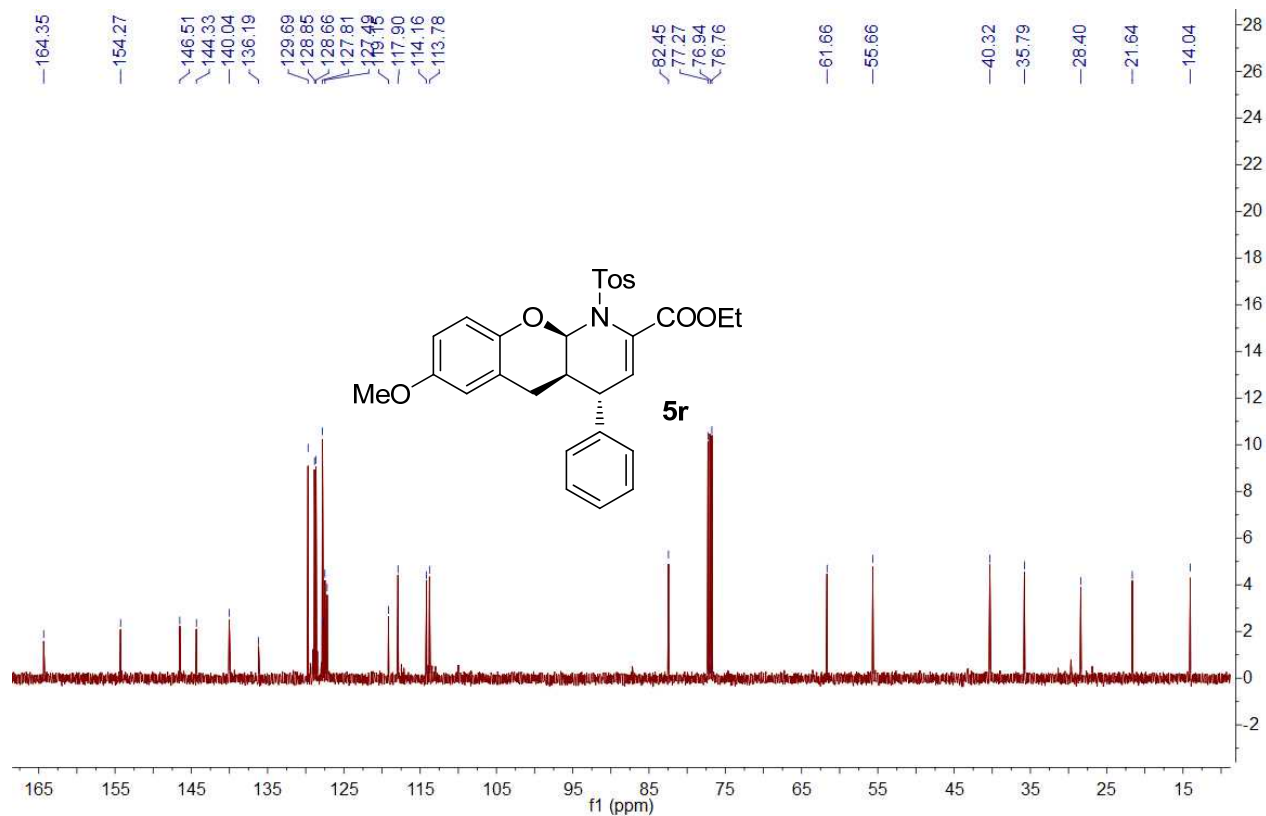

Chrom Type: Fixed WL Chromatogram, 210 nm

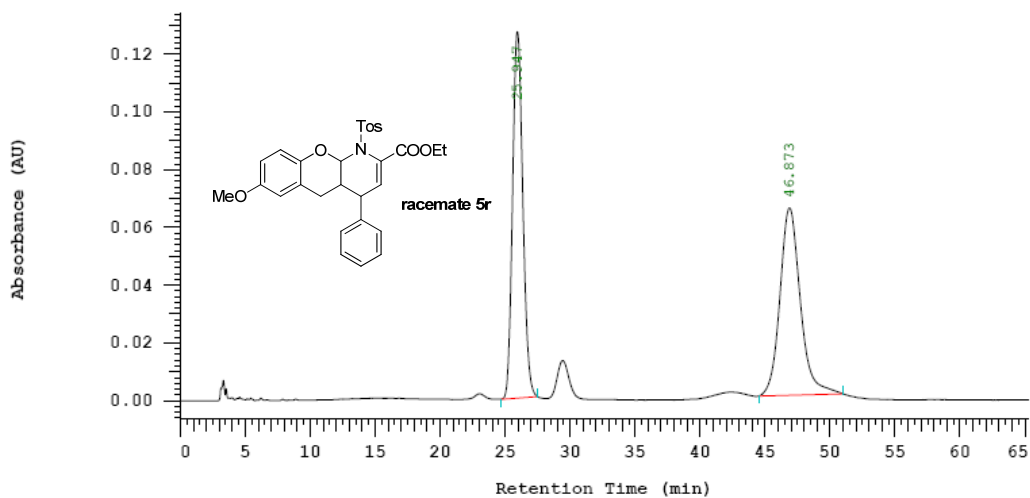

Chrom Type: Fixed WL Chromatogram, 210 nm

Peak Quantitation: AREA  
Calculation Method: AREA%

| No. | RT     | Area    | Area %  | BC |
|-----|--------|---------|---------|----|
| 1   | 25.947 | 3418802 | 49.283  | BB |
| 2   | 46.873 | 3518307 | 50.717  | BB |
|     |        | 6937109 | 100.000 |    |

Chrom Type: Fixed WL Chromatogram, 210 nm

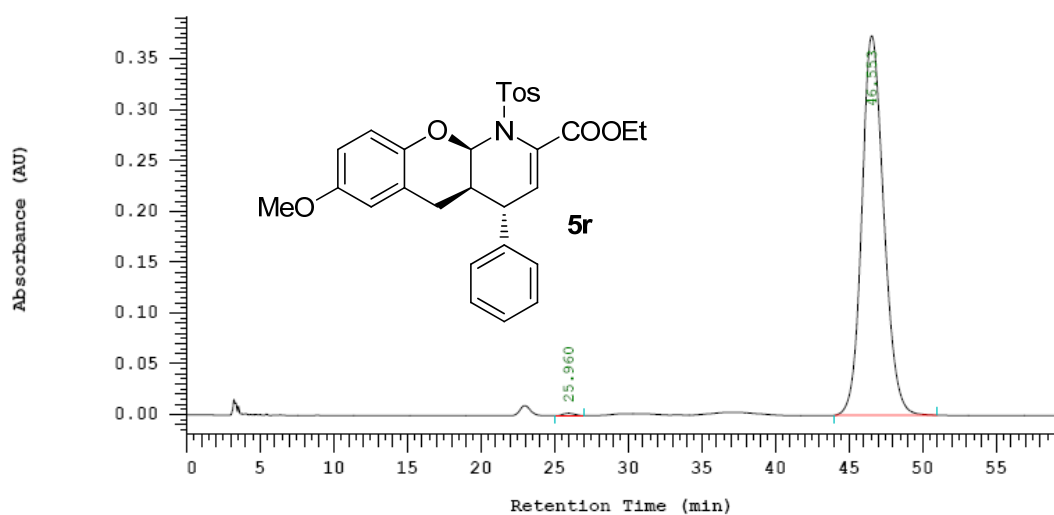

Chrom Type: Fixed WL Chromatogram, 210 nm

Peak Quantitation: AREA  
Calculation Method: AREA%

| No. | RT     | Area     | Area %  | BC |
|-----|--------|----------|---------|----|
| 1   | 25.960 | 60382    | 0.313   | BB |
| 2   | 46.553 | 19243372 | 99.687  | BB |
|     |        | 19303754 | 100.000 |    |

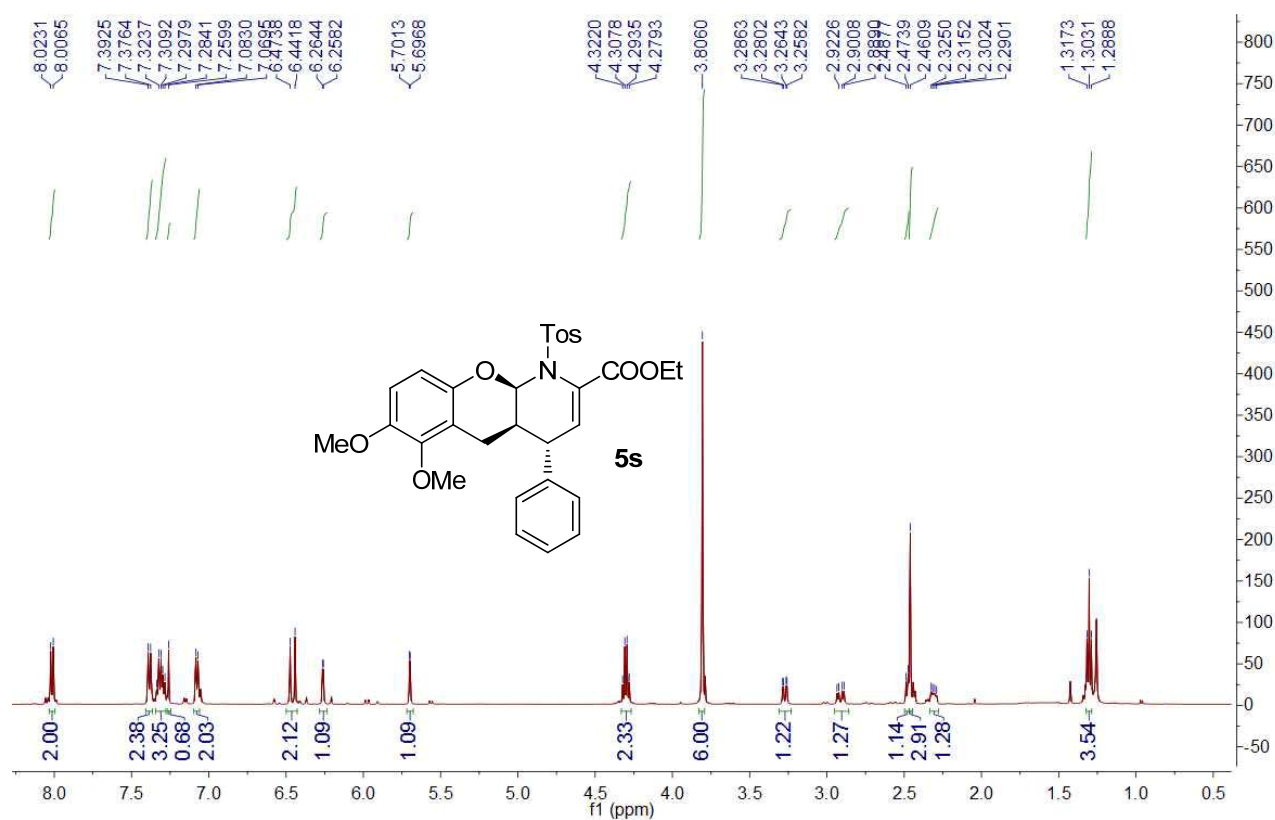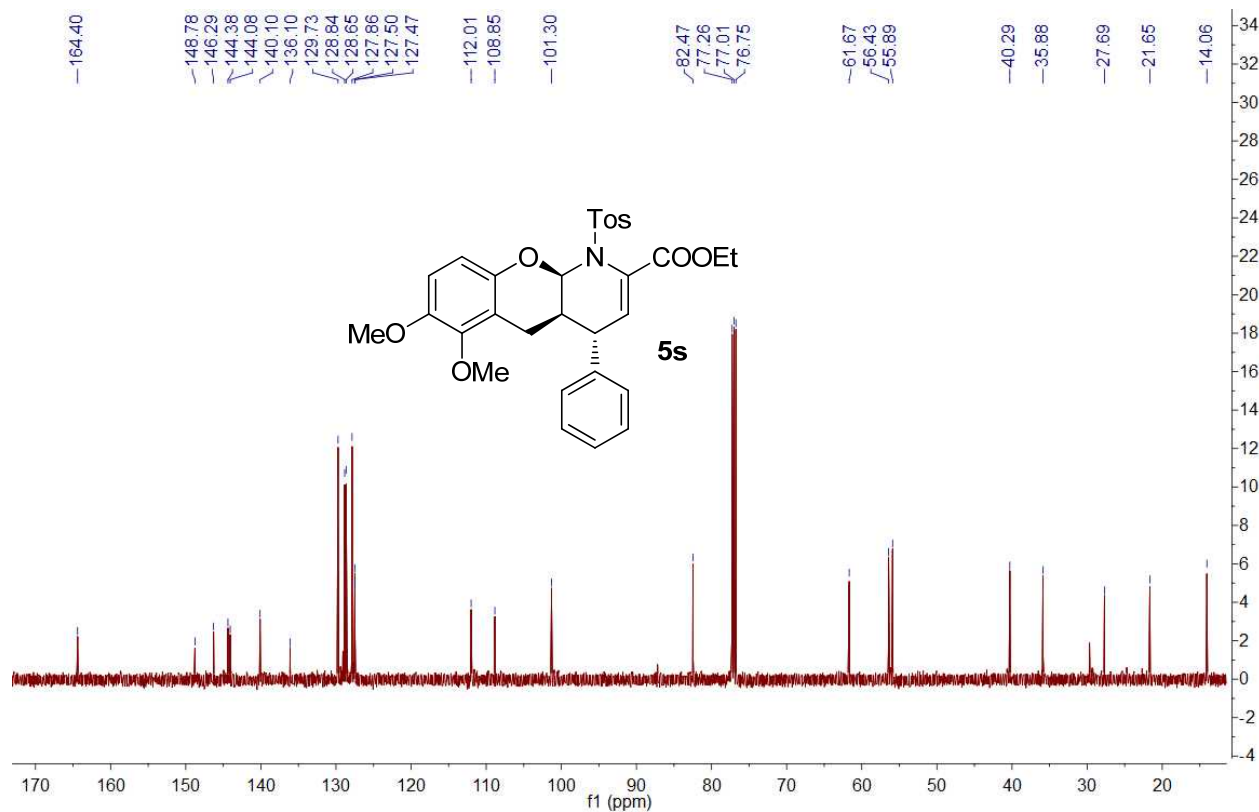

Chrom Type: Fixed WL Chromatogram, 210 nm

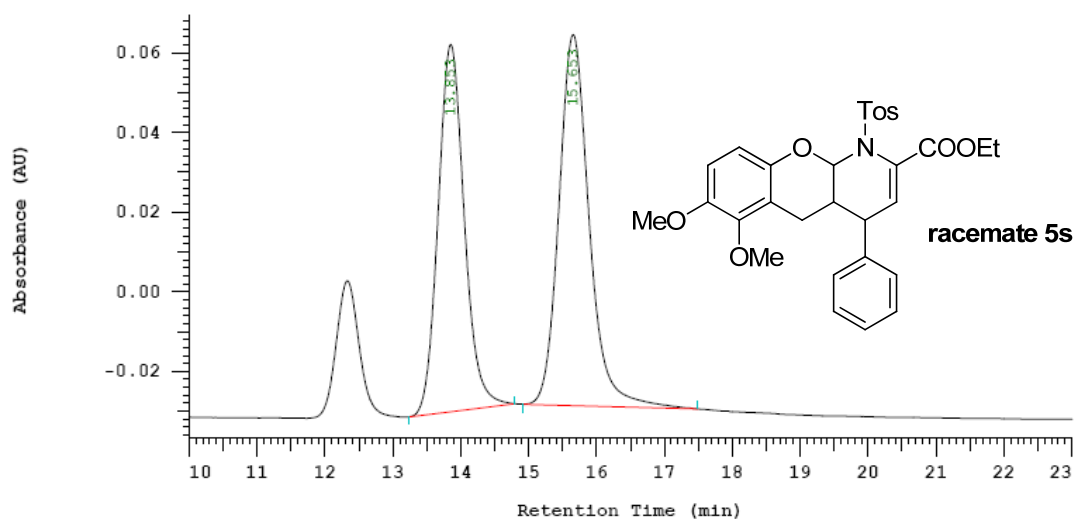

Chrom Type: Fixed WL Chromatogram, 210 nm

Peak Quantitation: AREA

Calculation Method: AREA%

| No. | RT     | Area    | Area %  | BC |
|-----|--------|---------|---------|----|
| 1   | 13.853 | 1231328 | 46.019  | BB |
| 2   | 15.653 | 1444384 | 53.981  | BB |
|     |        | 2675712 | 100.000 |    |

Chrom Type: Fixed WL Chromatogram, 210 nm

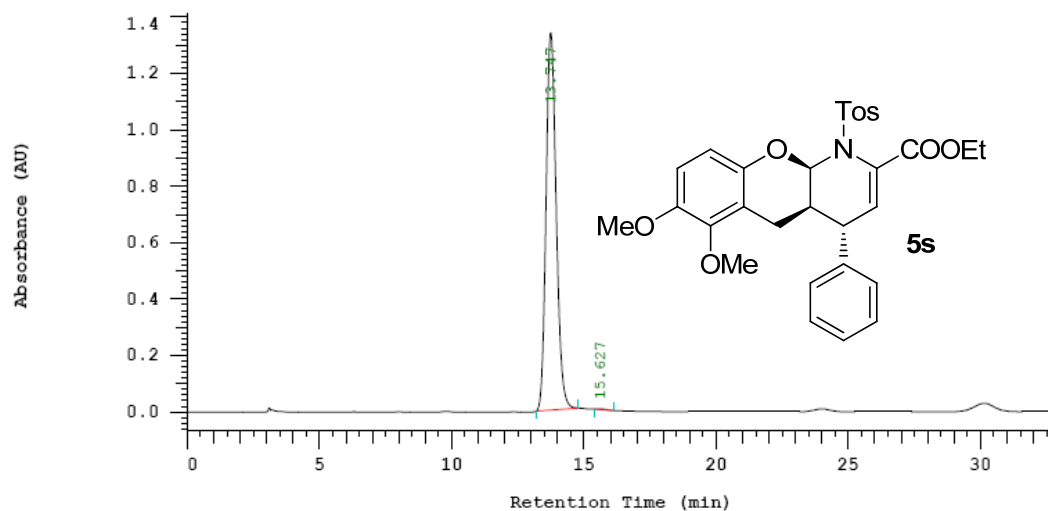

Chrom Type: Fixed WL Chromatogram, 210 nm

Peak Quantitation: AREA

Calculation Method: AREA%

| No. | RT     | Area     | Area %  | BC |
|-----|--------|----------|---------|----|
| 1   | 13.747 | 17627811 | 99.827  | BB |
| 2   | 15.627 | 30625    | 0.173   | BB |
|     |        | 17658436 | 100.000 |    |

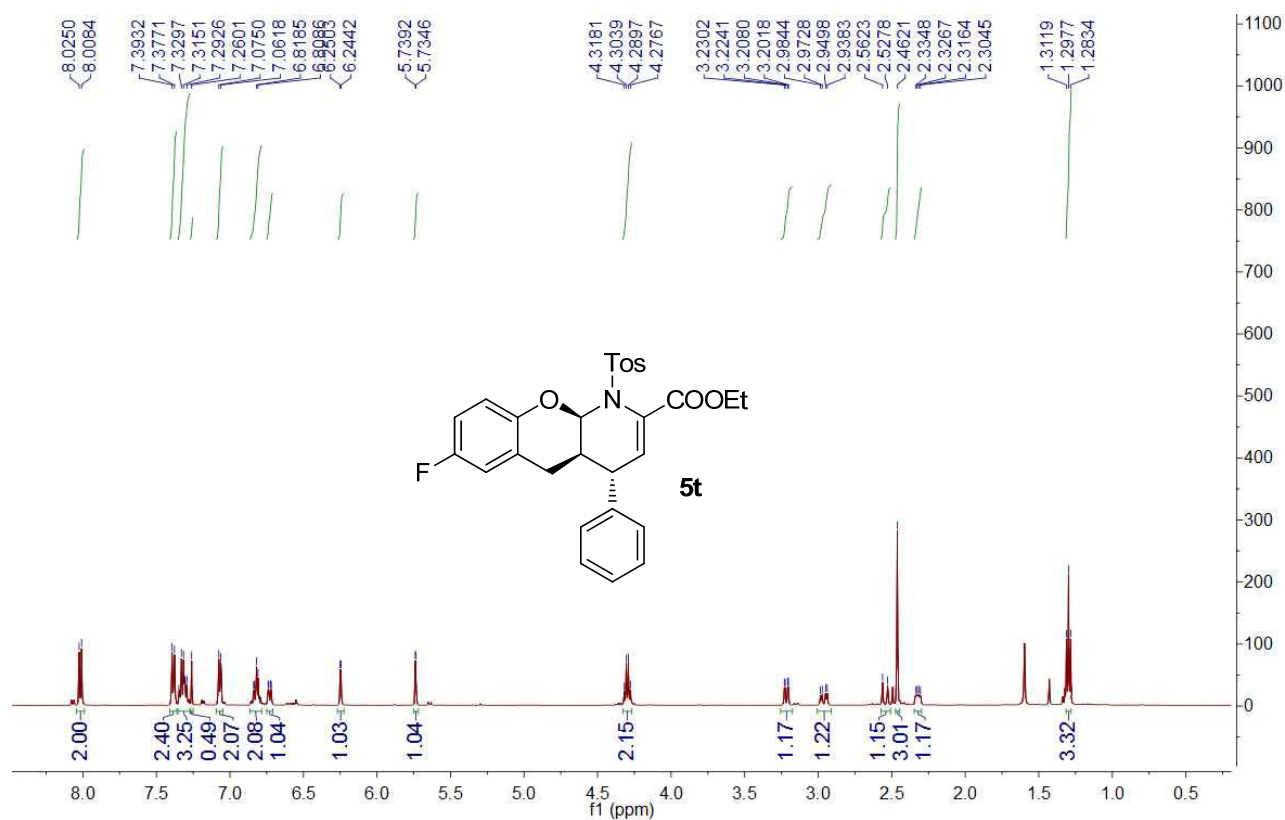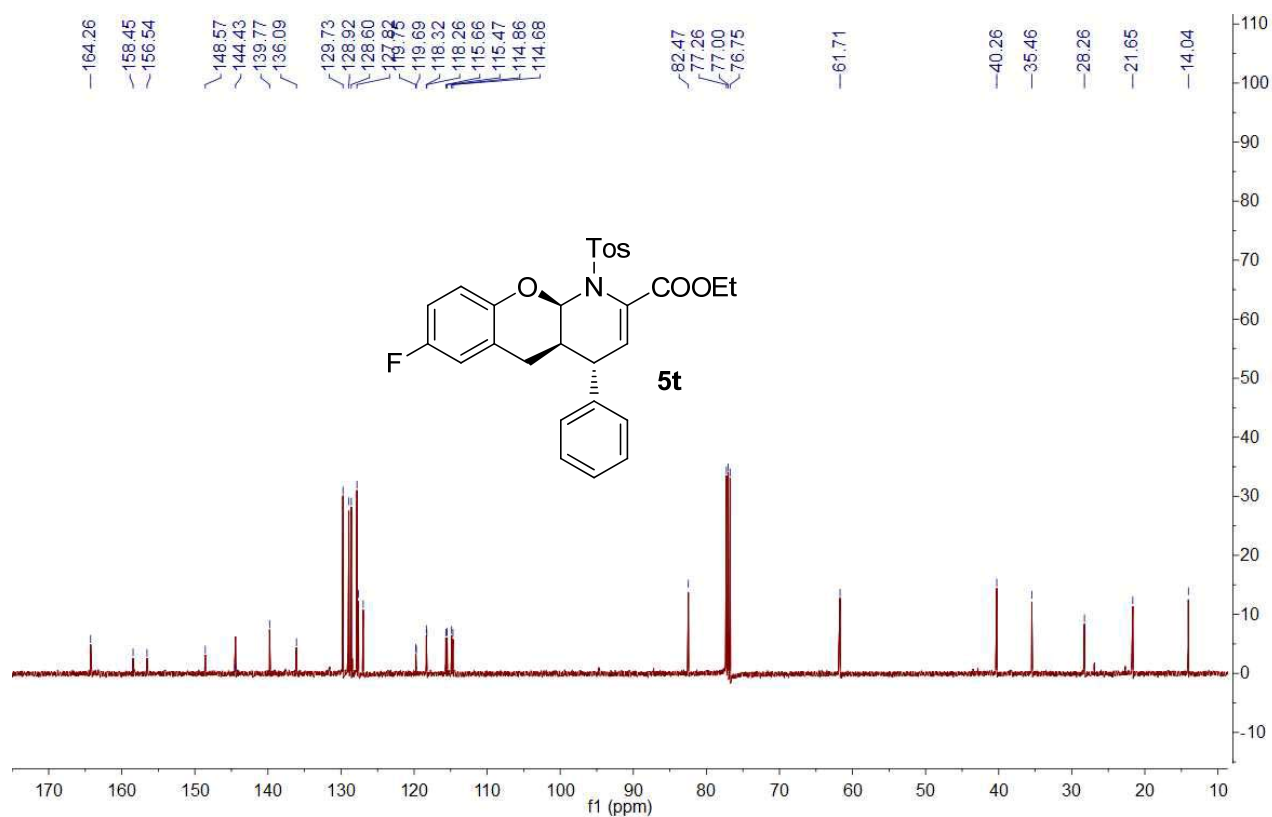

Chrom Type: Fixed WL Chromatogram, 210 nm

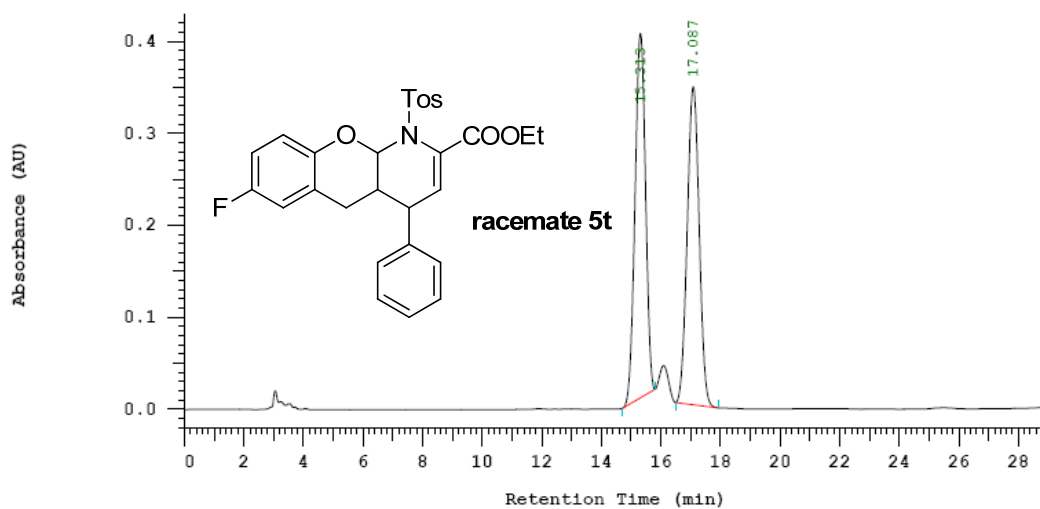

Chrom Type: Fixed WL Chromatogram, 210 nm

Peak Quantitation: AREA  
Calculation Method: AREA%

| No. | RT     | Area    | Area %  | BC |
|-----|--------|---------|---------|----|
| 1   | 15.313 | 4801154 | 50.118  | BB |
| 2   | 17.087 | 4778492 | 49.882  | BB |
|     |        | 9579646 | 100.000 |    |

Chrom Type: Fixed WL Chromatogram, 210 nm

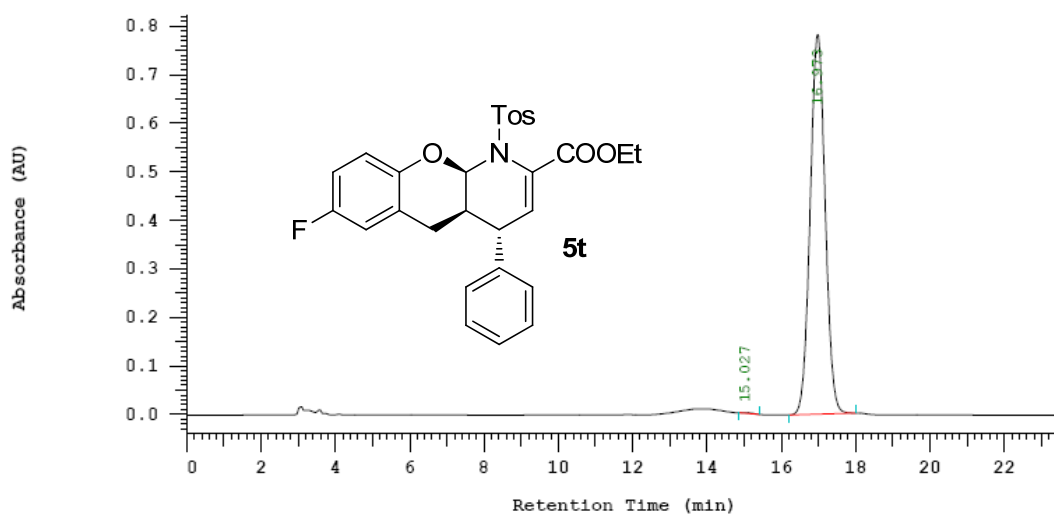

Chrom Type: Fixed WL Chromatogram, 210 nm

Peak Quantitation: AREA  
Calculation Method: AREA%

| No. | RT     | Area     | Area %  | BC |
|-----|--------|----------|---------|----|
| 1   | 15.027 | 13988    | 0.127   | BB |
| 2   | 16.973 | 10981186 | 99.873  | BB |
|     |        | 10995174 | 100.000 |    |

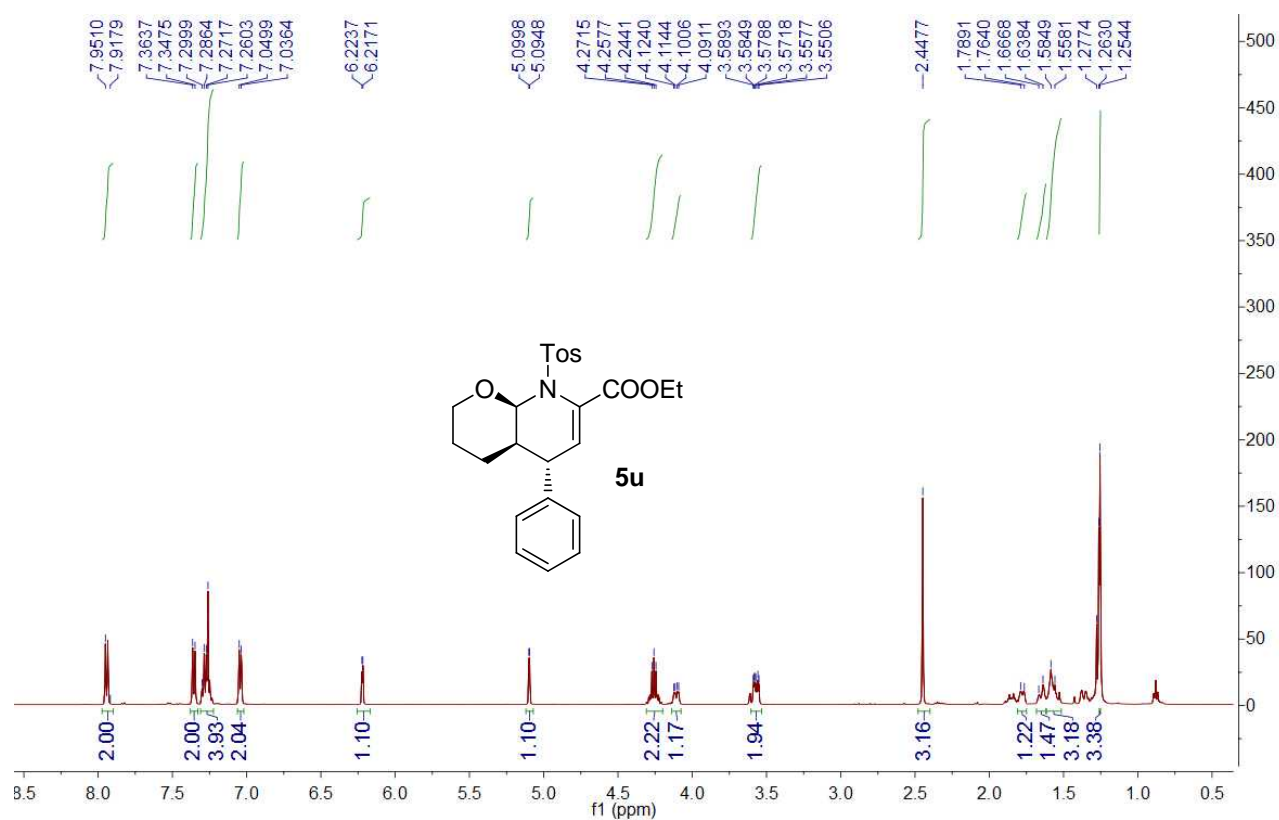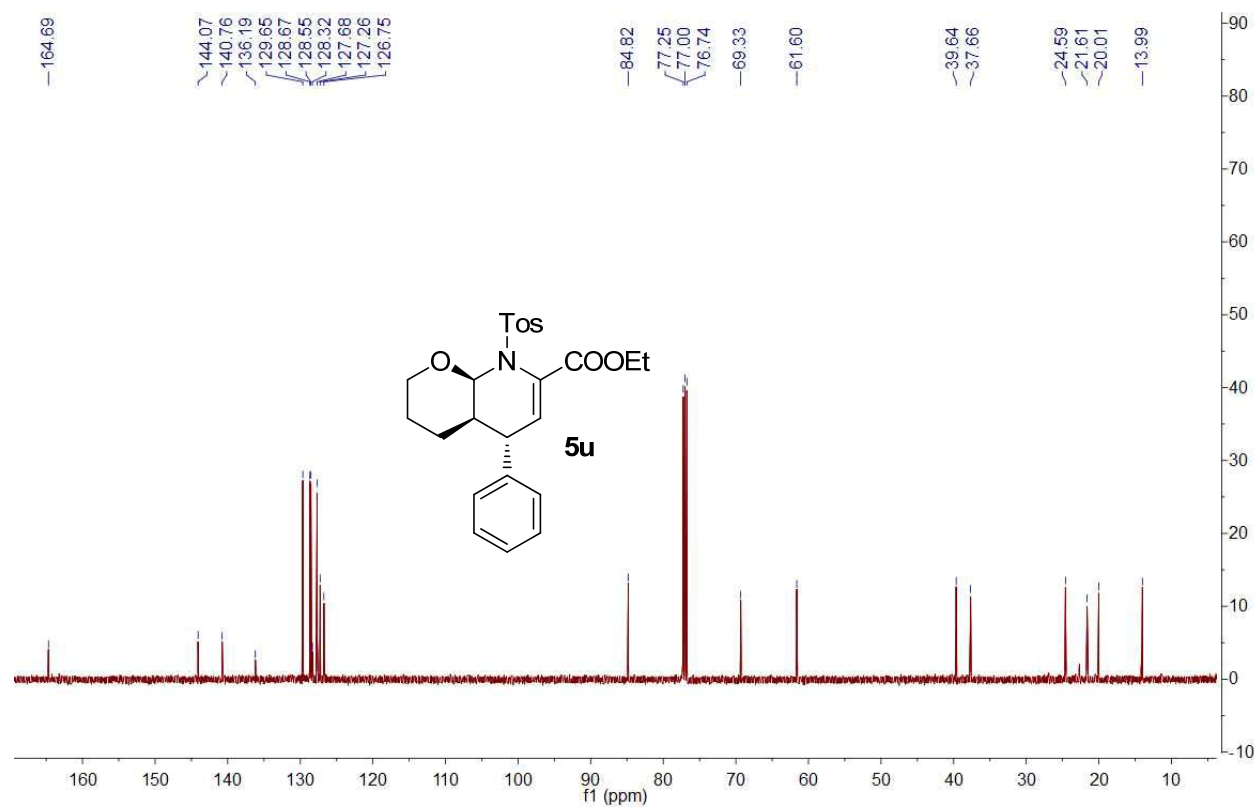

Chrom Type: Fixed WL Chromatogram, 210 nm

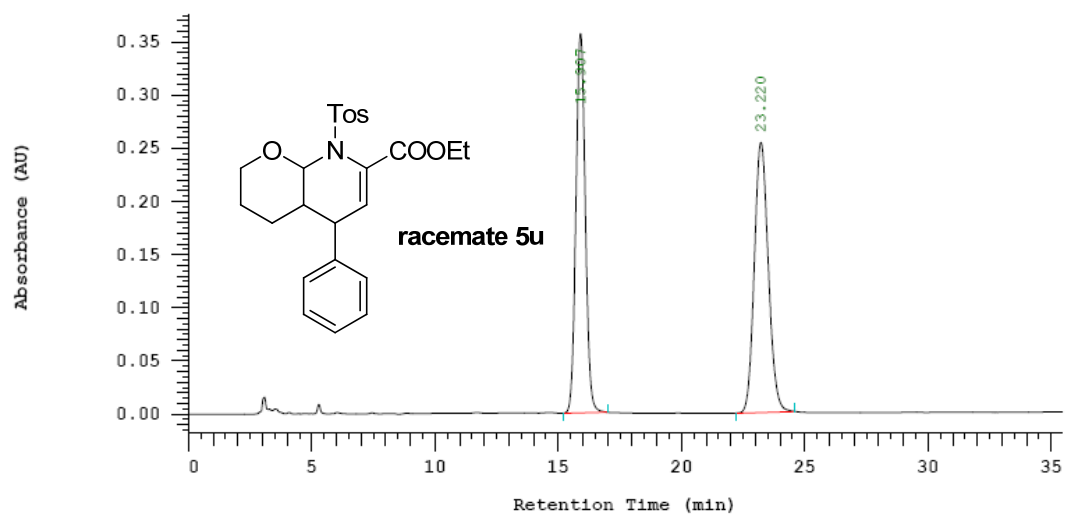

Chrom Type: Fixed WL Chromatogram, 210 nm

Peak Quantitation: AREA

Calculation Method: AREA%

| No. | RT     | Area    | Area %  | BC |
|-----|--------|---------|---------|----|
| 1   | 15.907 | 4659355 | 48.376  | BB |
| 2   | 23.220 | 4972233 | 51.624  | BB |
|     |        | 9631588 | 100.000 |    |

Chrom Type: Fixed WL Chromatogram, 210 nm

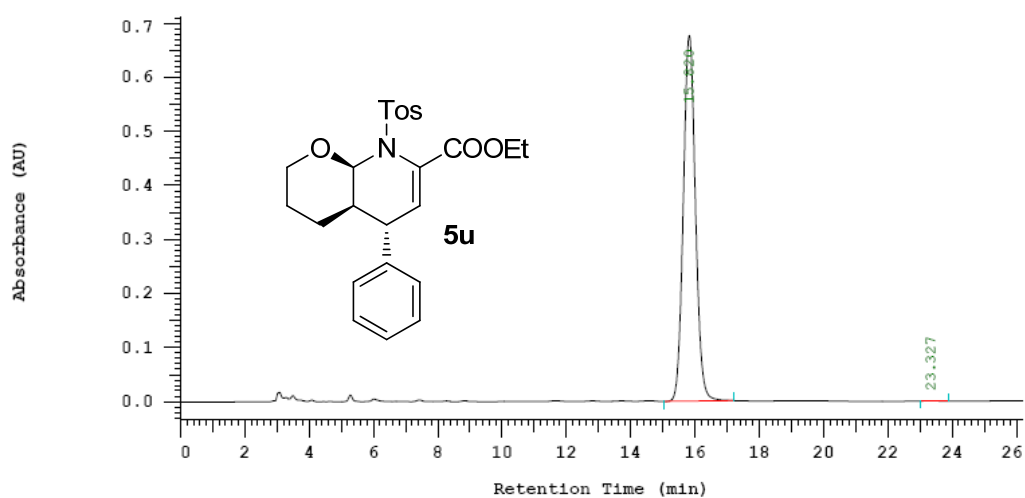

Chrom Type: Fixed WL Chromatogram, 210 nm

Peak Quantitation: AREA

Calculation Method: AREA%

| No. | RT     | Area    | Area %  | BC |
|-----|--------|---------|---------|----|
| 1   | 15.820 | 8851317 | 99.924  | BB |
| 2   | 23.327 | 6772    | 0.076   | BB |
|     |        | 8858089 | 100.000 |    |

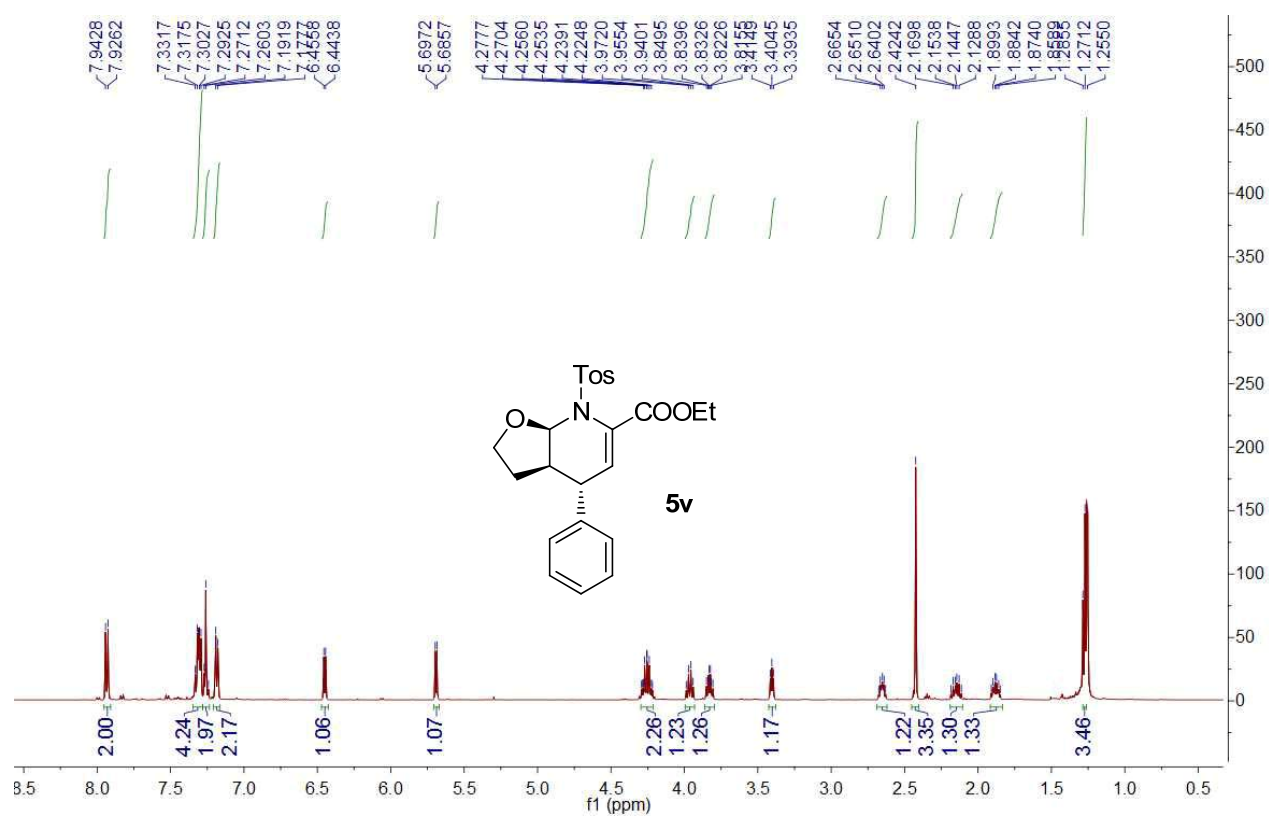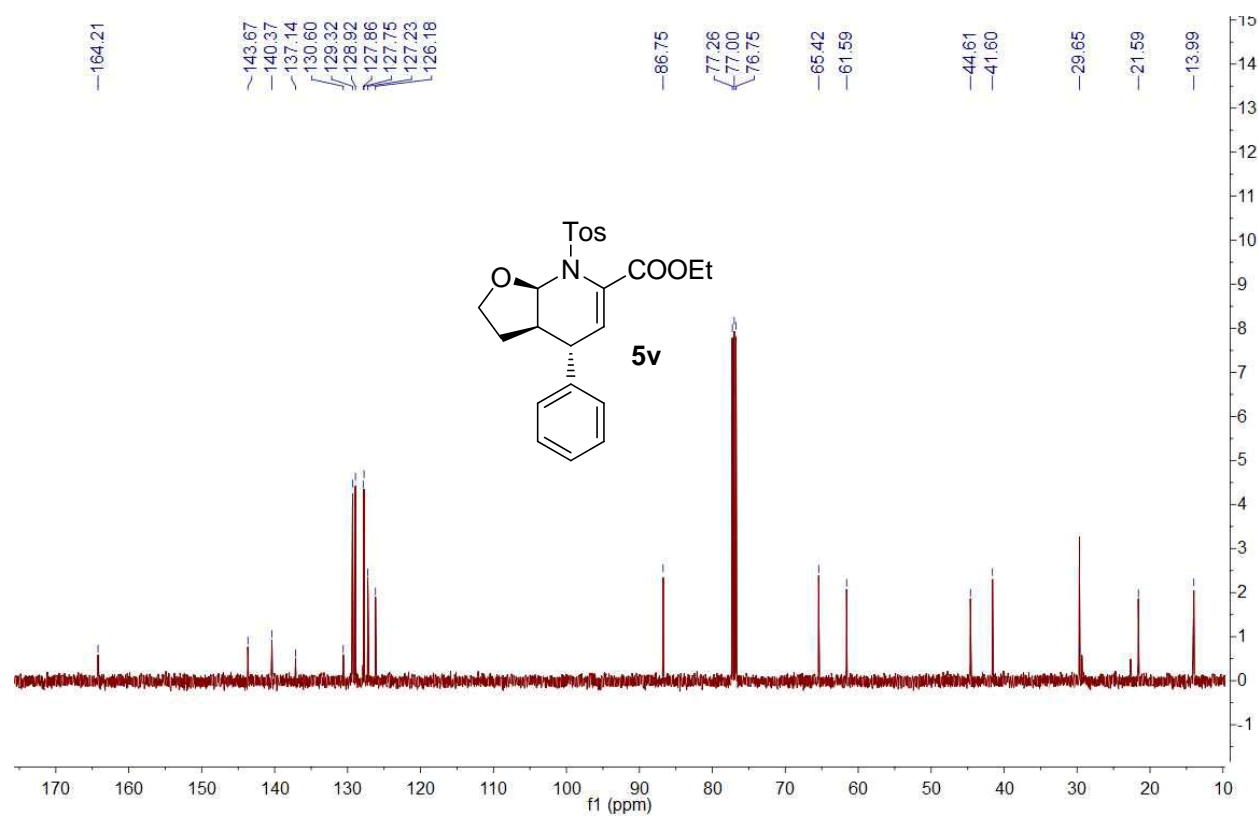

Chrom Type: Fixed WL Chromatogram, 210 nm

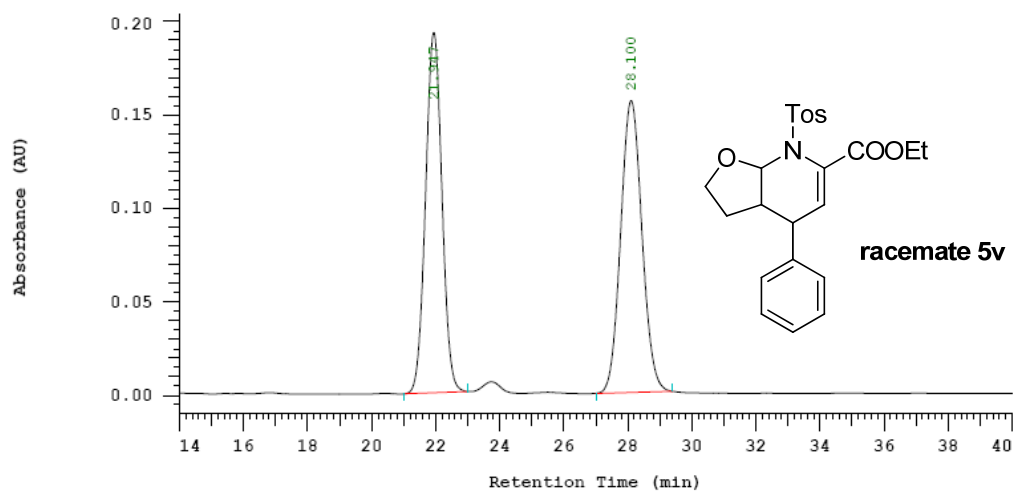

Chrom Type: Fixed WL Chromatogram, 210 nm

Peak Quantitation: AREA  
Calculation Method: AREA%

| No. | RT     | Area    | Area %  | BC |
|-----|--------|---------|---------|----|
| 1   | 21.947 | 3405600 | 48.662  | BB |
| 2   | 28.100 | 3592918 | 51.338  | BB |
|     |        | 6998518 | 100.000 |    |

Chrom Type: Fixed WL Chromatogram, 210 nm

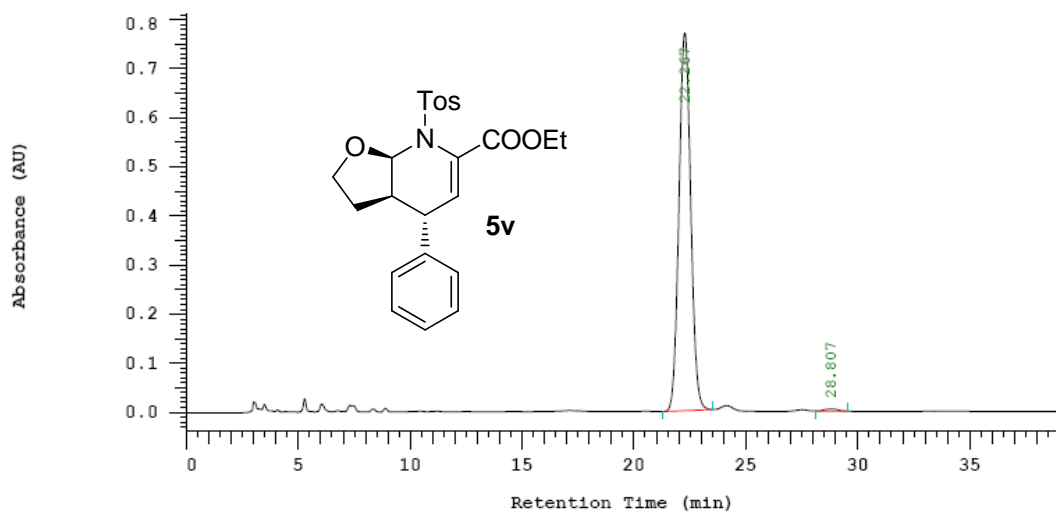

Chrom Type: Fixed WL Chromatogram, 210 nm

Peak Quantitation: AREA  
Calculation Method: AREA%

| No. | RT     | Area     | Area %  | BC |
|-----|--------|----------|---------|----|
| 1   | 22.267 | 13867534 | 99.332  | BB |
| 2   | 28.807 | 93303    | 0.668   | BB |
|     |        | 13960837 | 100.000 |    |

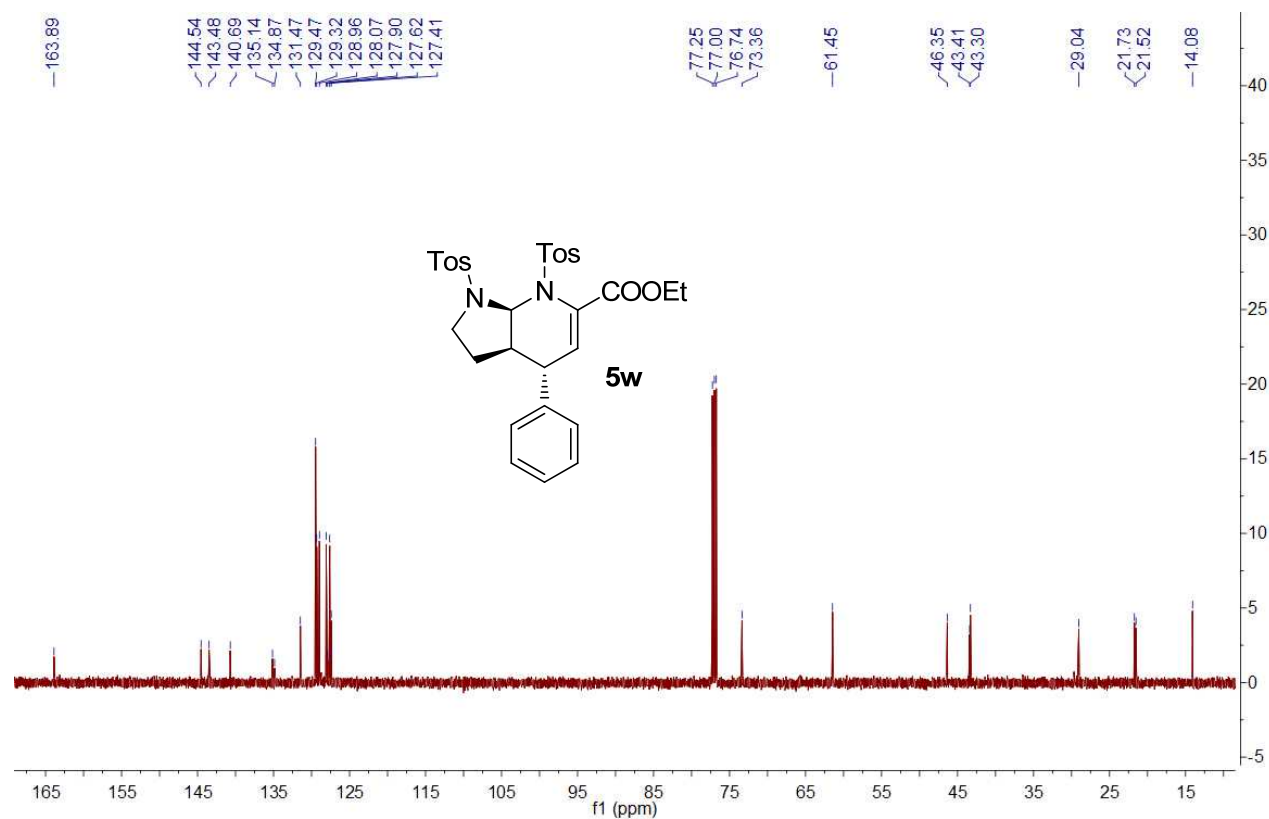

Chrom Type: Fixed WL Chromatogram, 210 nm

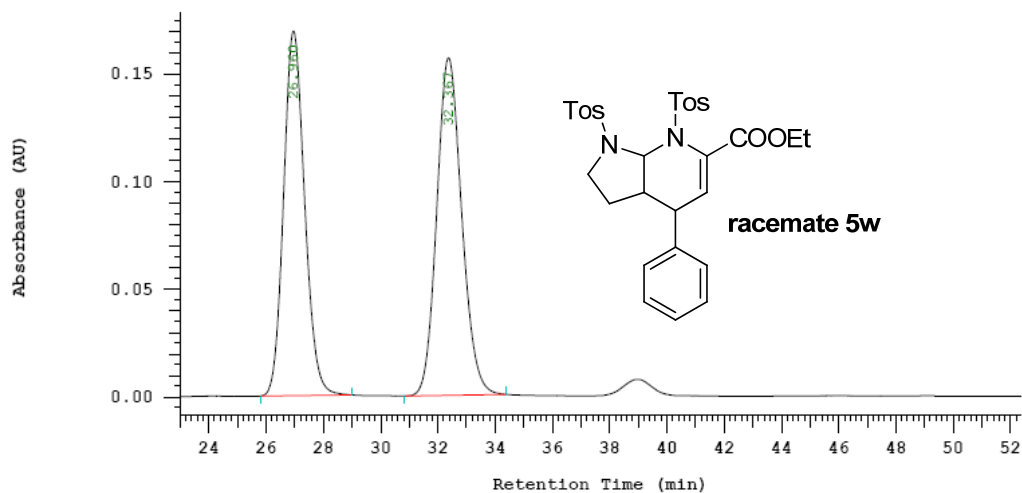

Chrom Type: Fixed WL Chromatogram, 210 nm

Peak Quantitation: AREA  
Calculation Method: AREA%

| No. | RT     | Area    | Area %  | BC |
|-----|--------|---------|---------|----|
| 1   | 26.960 | 4291801 | 47.512  | BB |
| 2   | 32.367 | 4741311 | 52.488  | BB |
|     |        | 9033112 | 100.000 |    |

Chrom Type: Fixed WL Chromatogram, 210 nm

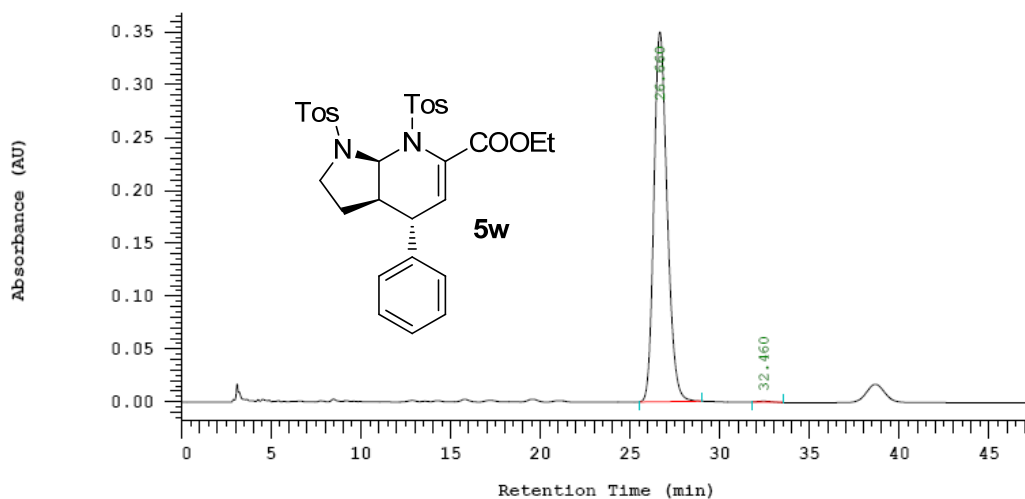

Chrom Type: Fixed WL Chromatogram, 210 nm

Peak Quantitation: AREA  
Calculation Method: AREA%

| No. | RT     | Area    | Area %  | BC |
|-----|--------|---------|---------|----|
| 1   | 26.660 | 8913444 | 99.799  | BB |
| 2   | 32.460 | 17927   | 0.201   | BB |
|     |        | 8913371 | 100.000 |    |

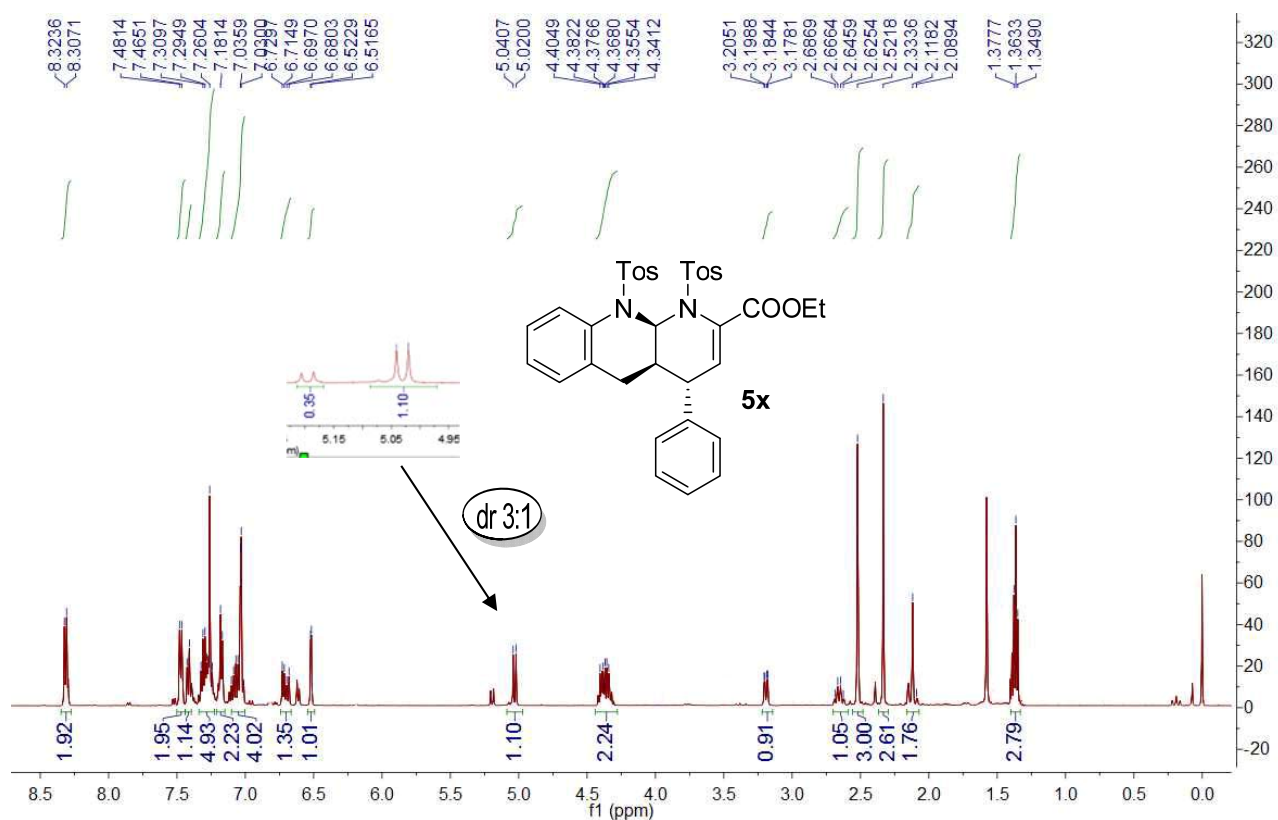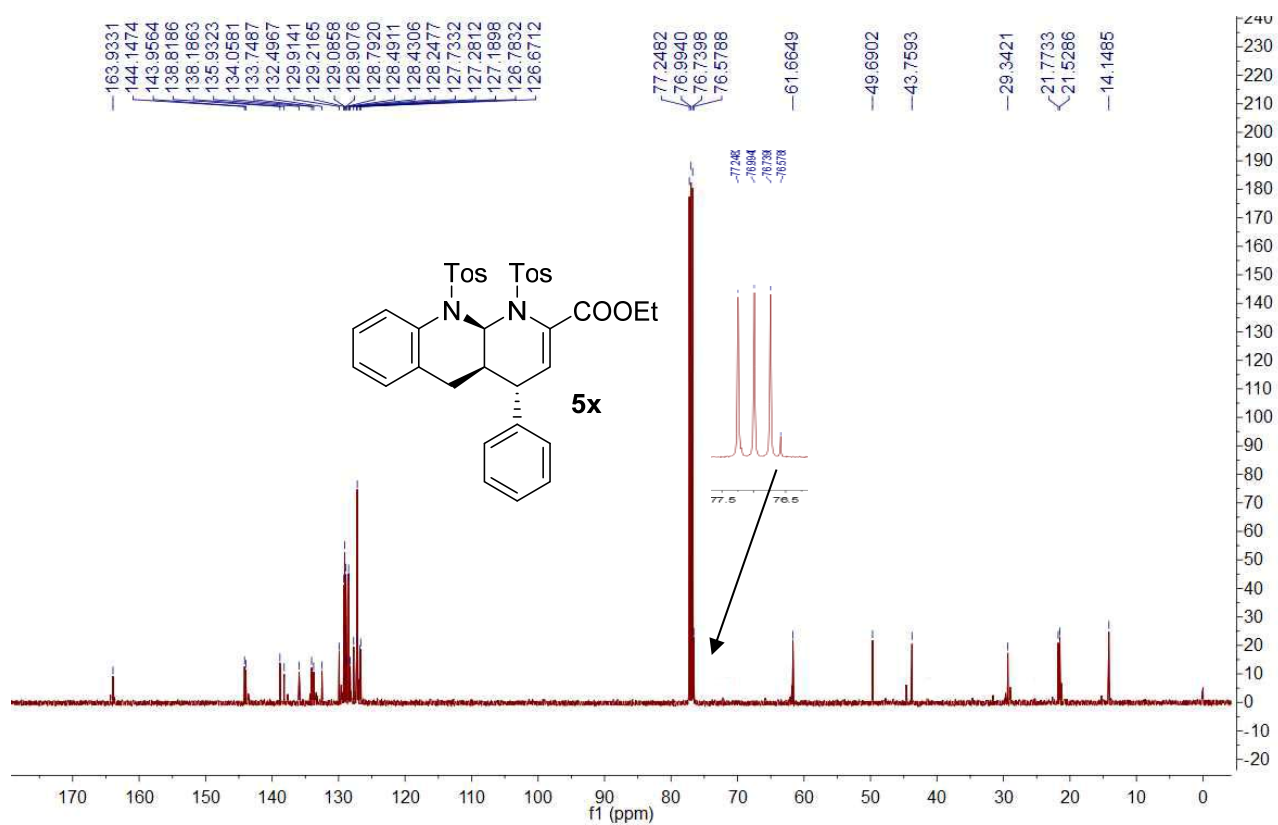

Chrom Type: Fixed WL Chromatogram, 210 nm

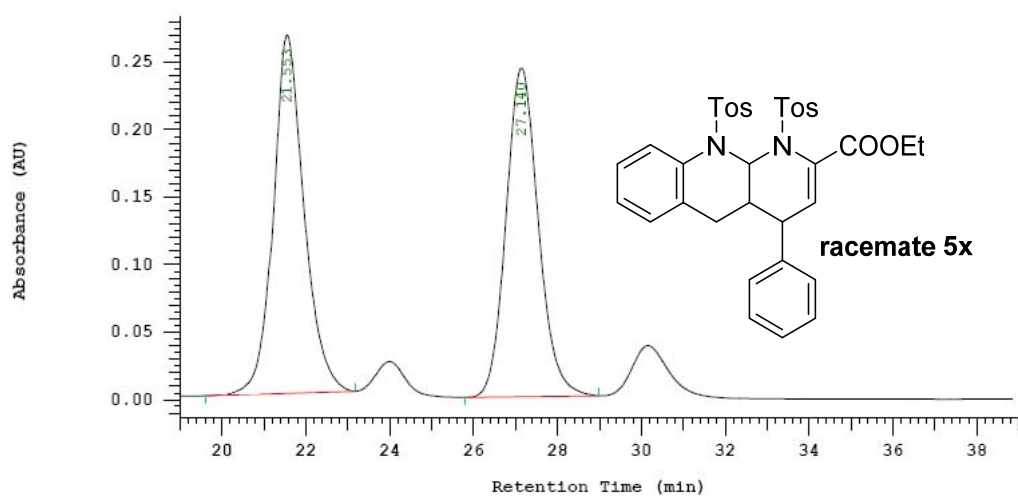

Chrom Type: Fixed WL Chromatogram, 210 nm

Peak Quantitation: AREA  
Calculation Method: AREA%

| No. | RT     | Area     | Area %  | BC |
|-----|--------|----------|---------|----|
| 1   | 21.553 | 7260308  | 52.697  | BB |
| 2   | 27.140 | 6517057  | 47.303  | BB |
|     |        | 13777365 | 100.000 |    |

Chrom Type: Fixed WL Chromatogram, 210 nm

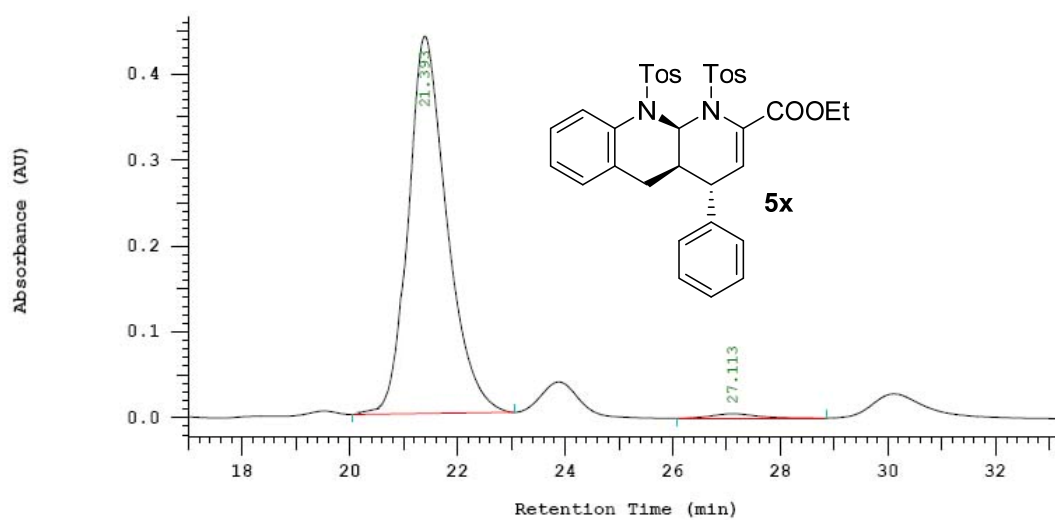

Chrom Type: Fixed WL Chromatogram, 210 nm

Peak Quantitation: AREA  
Calculation Method: AREA%

| No. | RT     | Area     | Area %  | BC |
|-----|--------|----------|---------|----|
| 1   | 21.393 | 11656993 | 98.816  | BB |
| 2   | 27.113 | 139633   | 1.184   | BB |
|     |        | 11796626 | 100.000 |    |

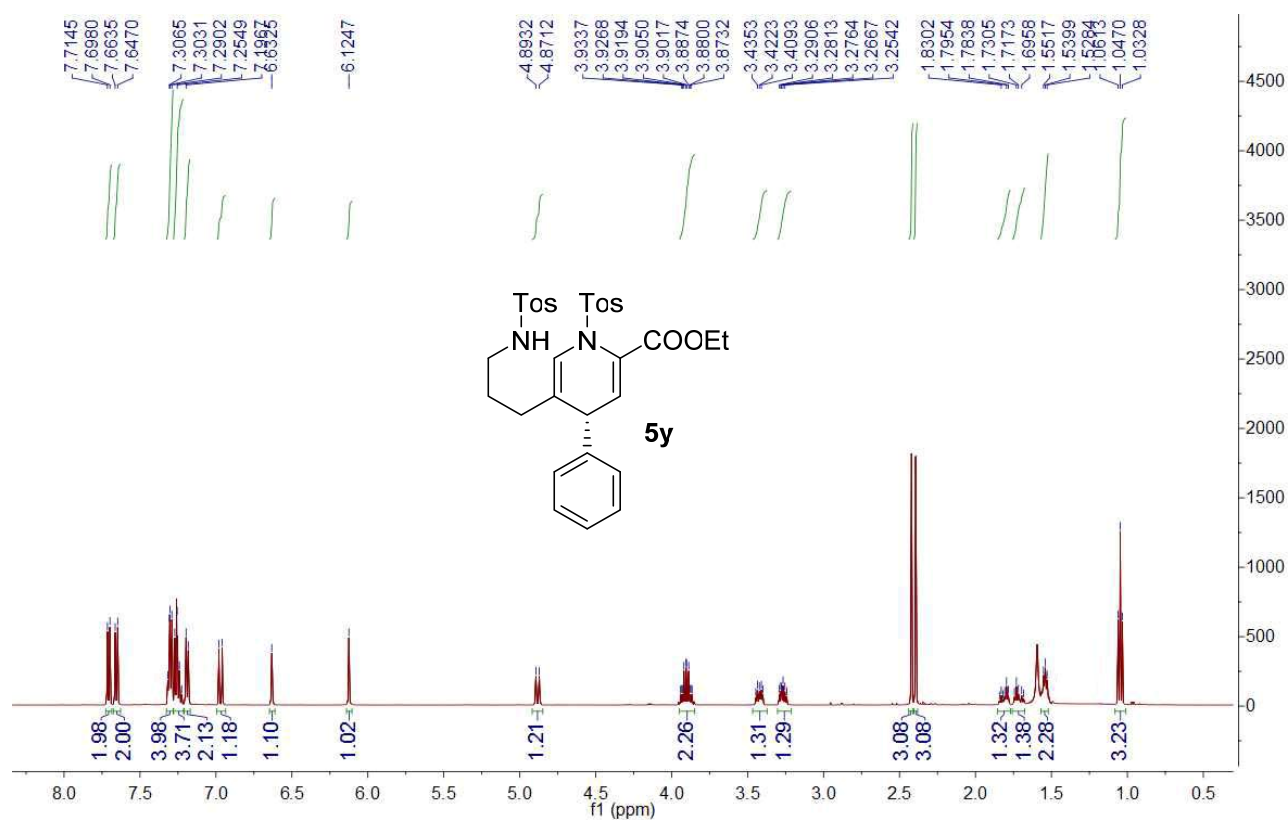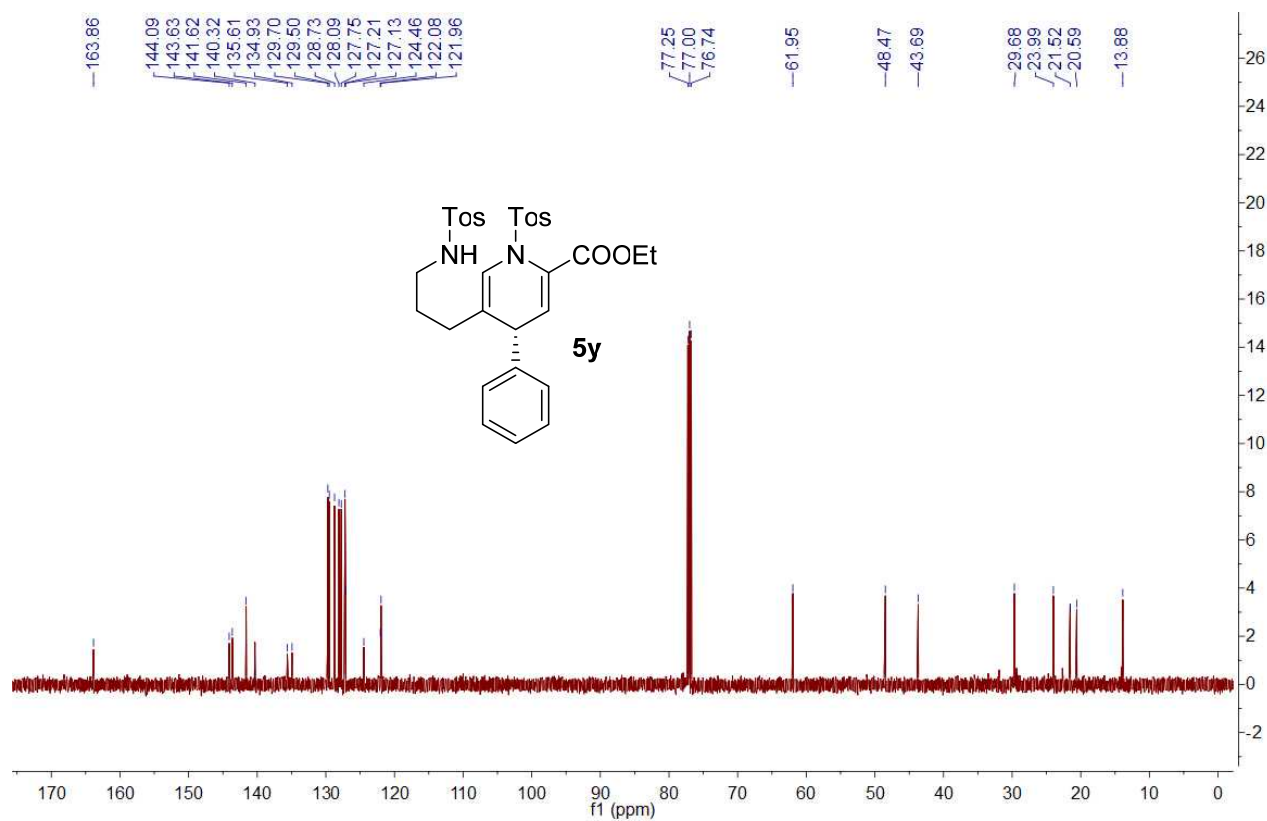

Chrom Type: Fixed WL Chromatogram, 210 nm

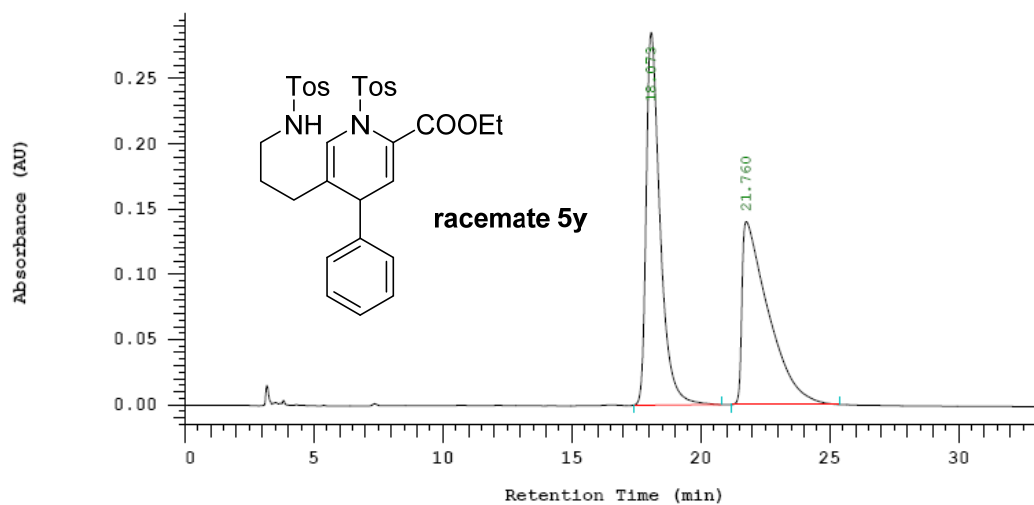

Chrom Type: Fixed WL Chromatogram, 210 nm

Peak Quantitation: AREA

Calculation Method: AREA%

| No. | RT     | Area     | Area %  | BC |
|-----|--------|----------|---------|----|
| 1   | 18.073 | 5323243  | 51.691  | BB |
| 2   | 21.760 | 4974977  | 48.309  | BB |
|     |        | 10298220 | 100.000 |    |

Chrom Type: Fixed WL Chromatogram, 210 nm

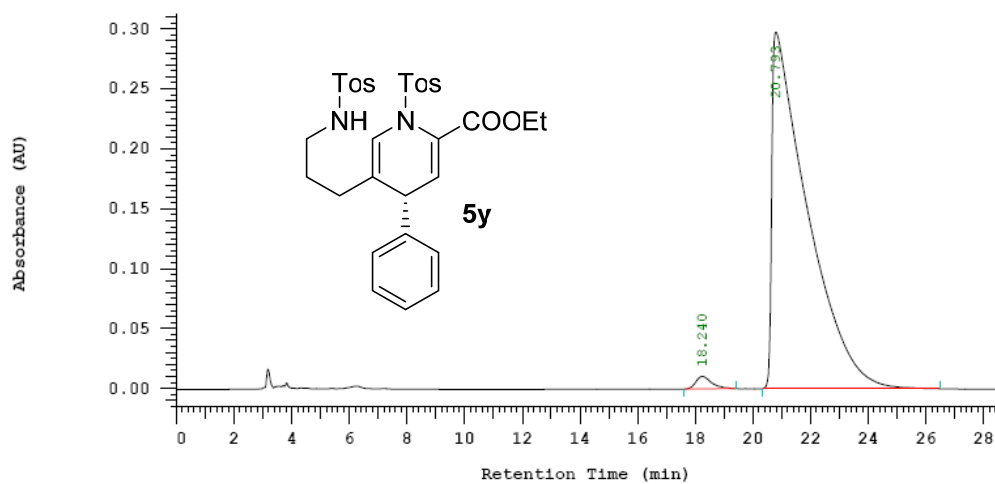

Chrom Type: Fixed WL Chromatogram, 210 nm

Peak Quantitation: AREA

Calculation Method: AREA%

| No. | RT     | Area     | Area %  | BC |
|-----|--------|----------|---------|----|
| 1   | 18.240 | 198817   | 1.542   | BB |
| 2   | 20.793 | 12698749 | 98.458  | BB |
|     |        | 12897566 | 100.000 |    |

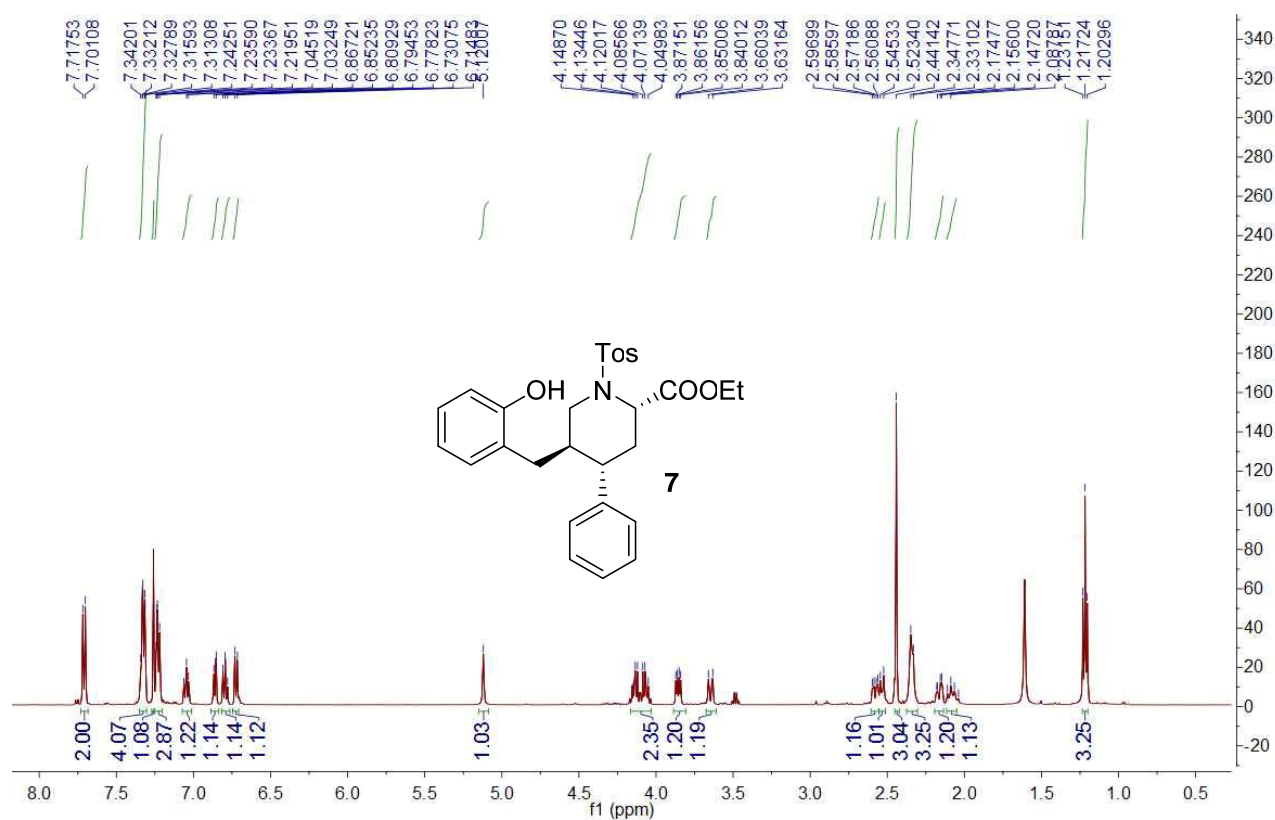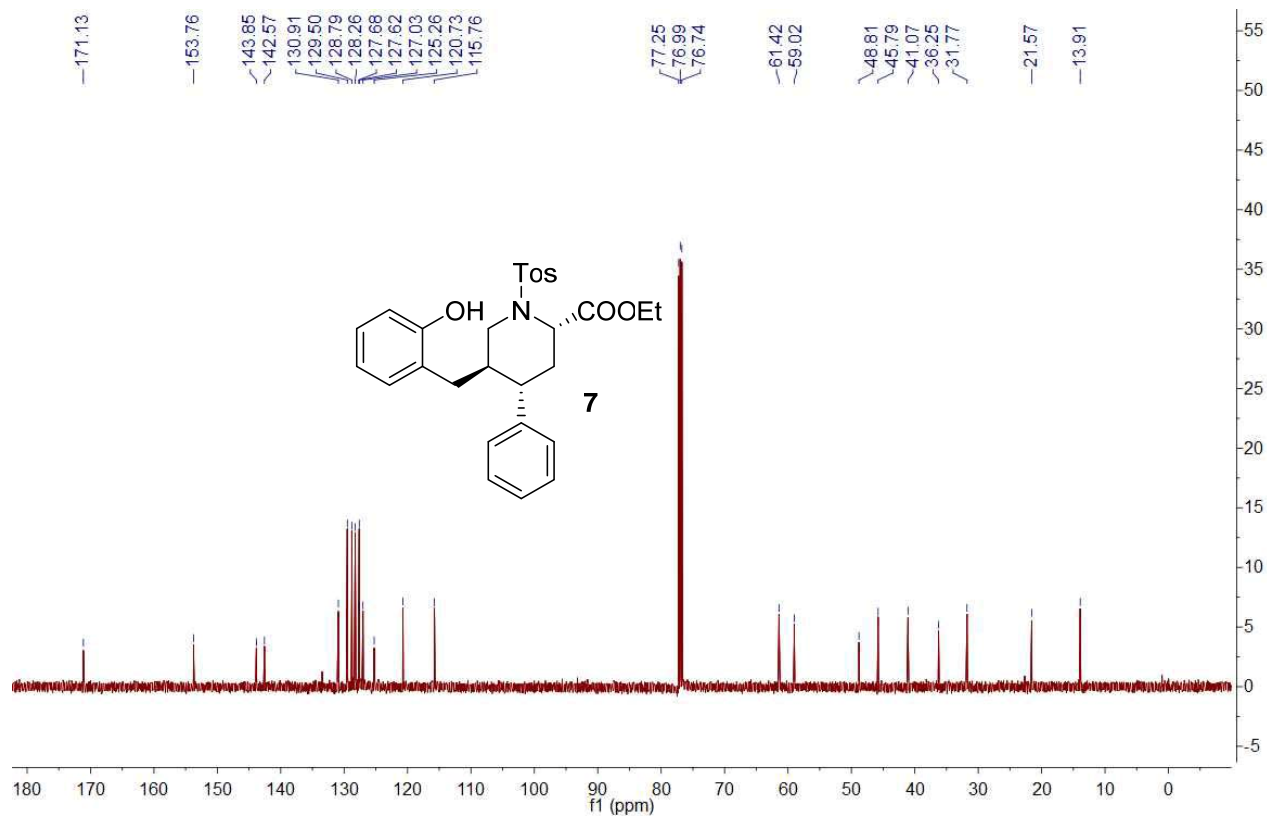

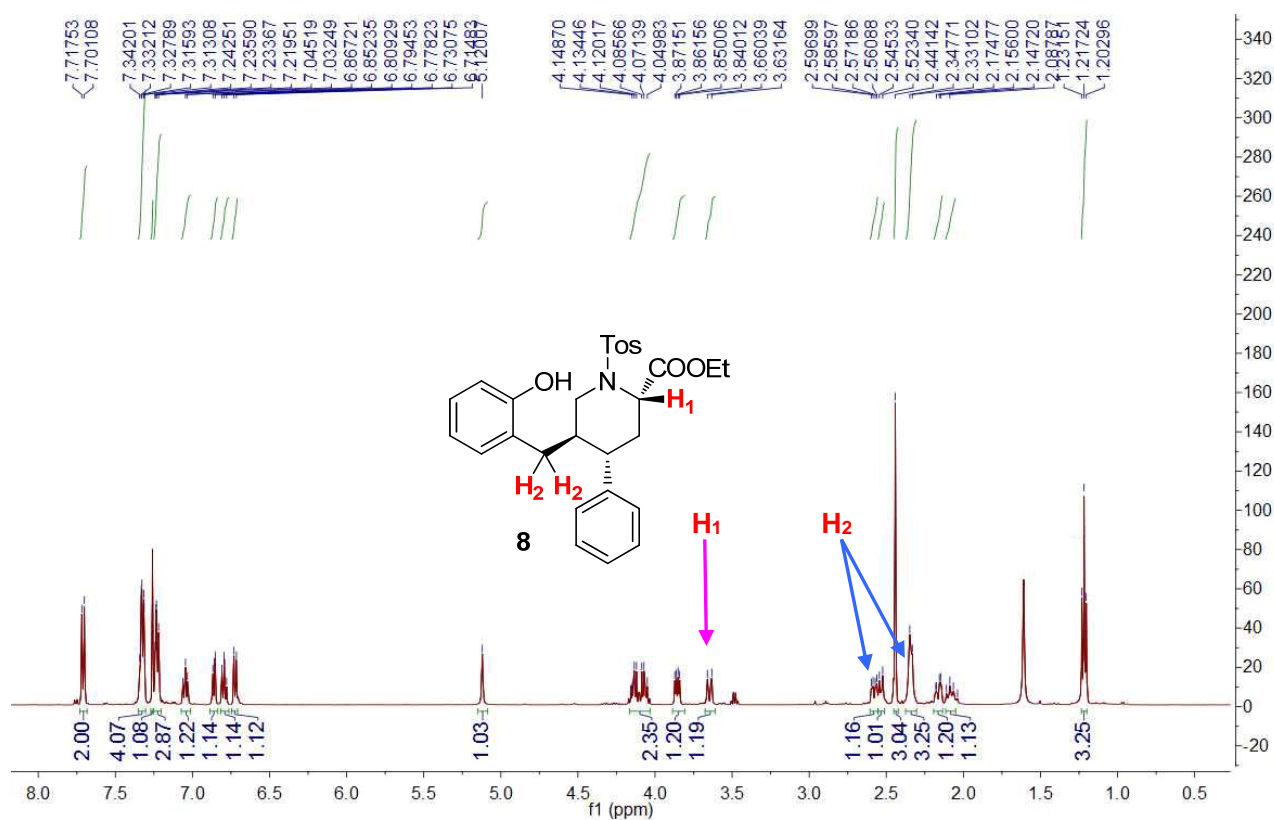

### CDCl<sub>3</sub>-NOESY-7

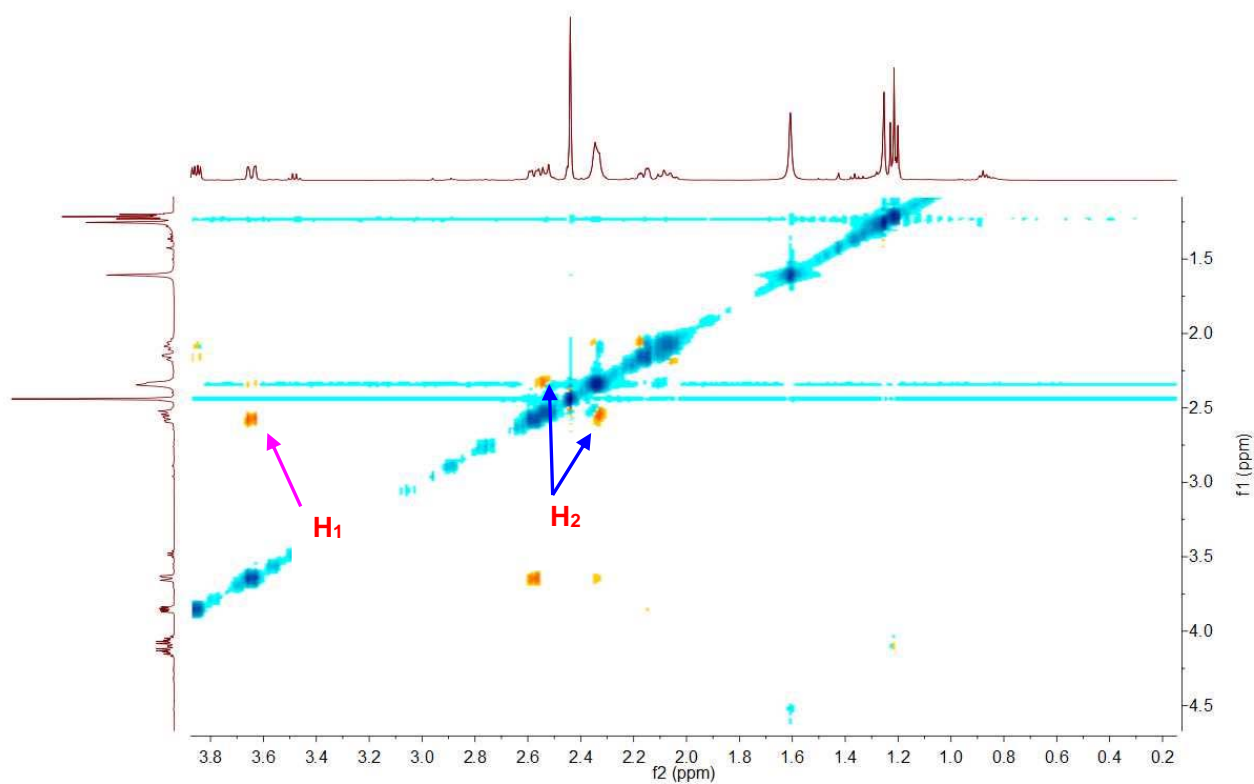

Chrom Type: Fixed WL Chromatogram, 210 nm

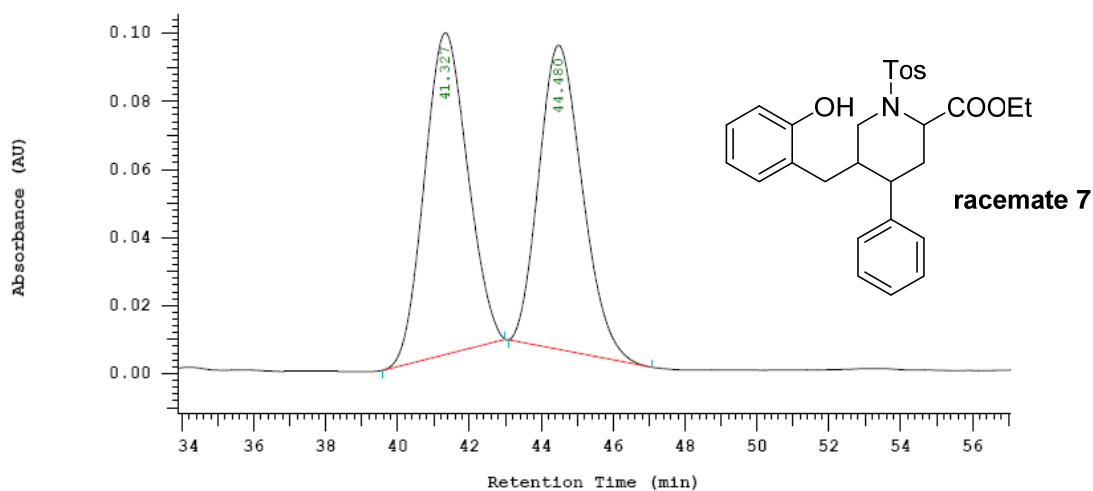

Chrom Type: Fixed WL Chromatogram, 210 nm

Peak Quantitation: AREA  
Calculation Method: AREA%

| No. | RT     | Area    | Area %  | BC |
|-----|--------|---------|---------|----|
| 1   | 41.327 | 3926928 | 51.119  | BB |
| 2   | 44.480 | 3754985 | 48.881  | BB |
|     |        | 7681913 | 100.000 |    |

Chrom Type: Fixed WL Chromatogram, 210 nm

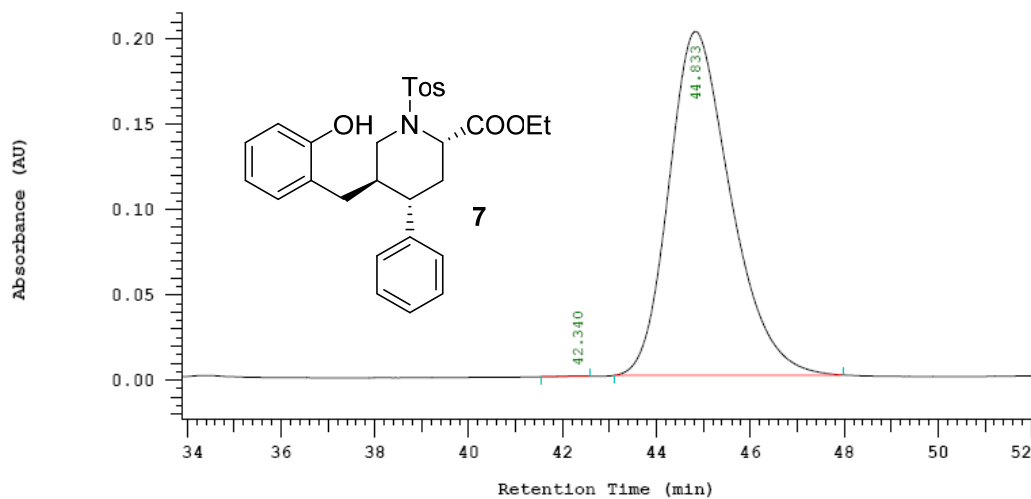

Chrom Type: Fixed WL Chromatogram, 210 nm

Peak Quantitation: AREA  
Calculation Method: AREA%

| No. | RT     | Area    | Area %  | BC |
|-----|--------|---------|---------|----|
| 1   | 42.340 | 4196    | 0.045   | BB |
| 2   | 44.833 | 9229070 | 99.955  | BB |
|     |        | 9233266 | 100.000 |    |

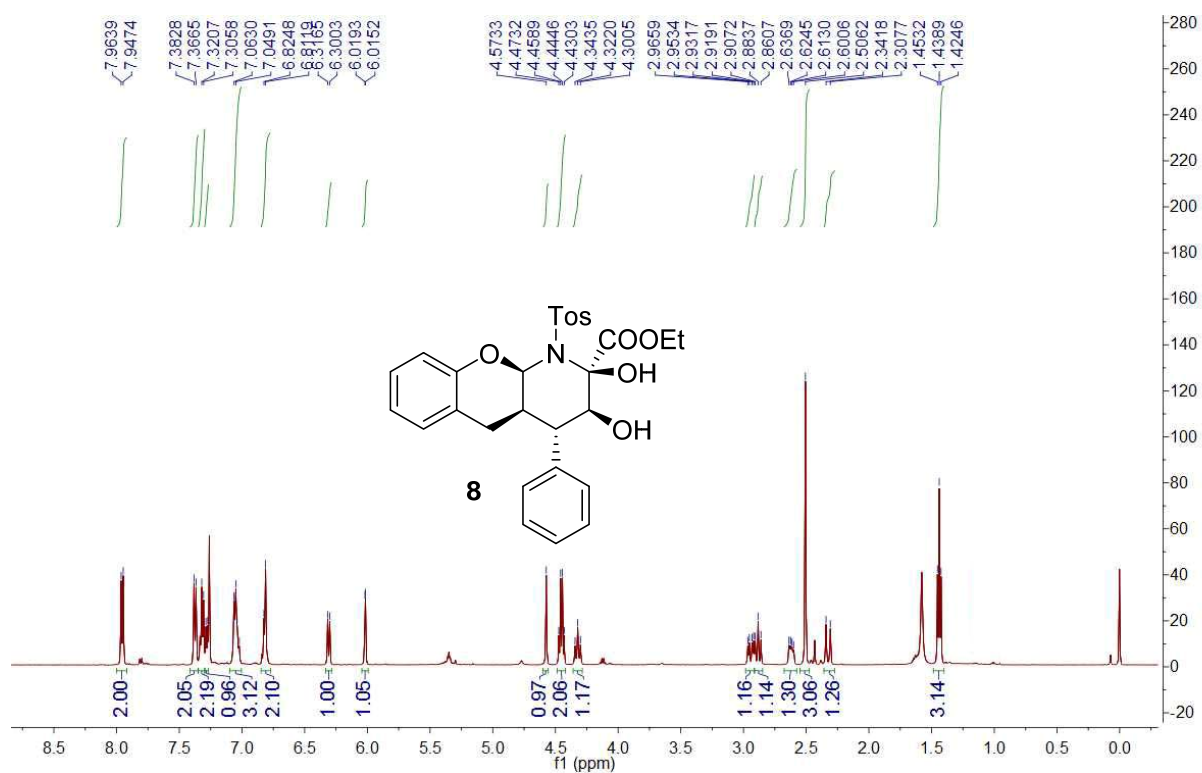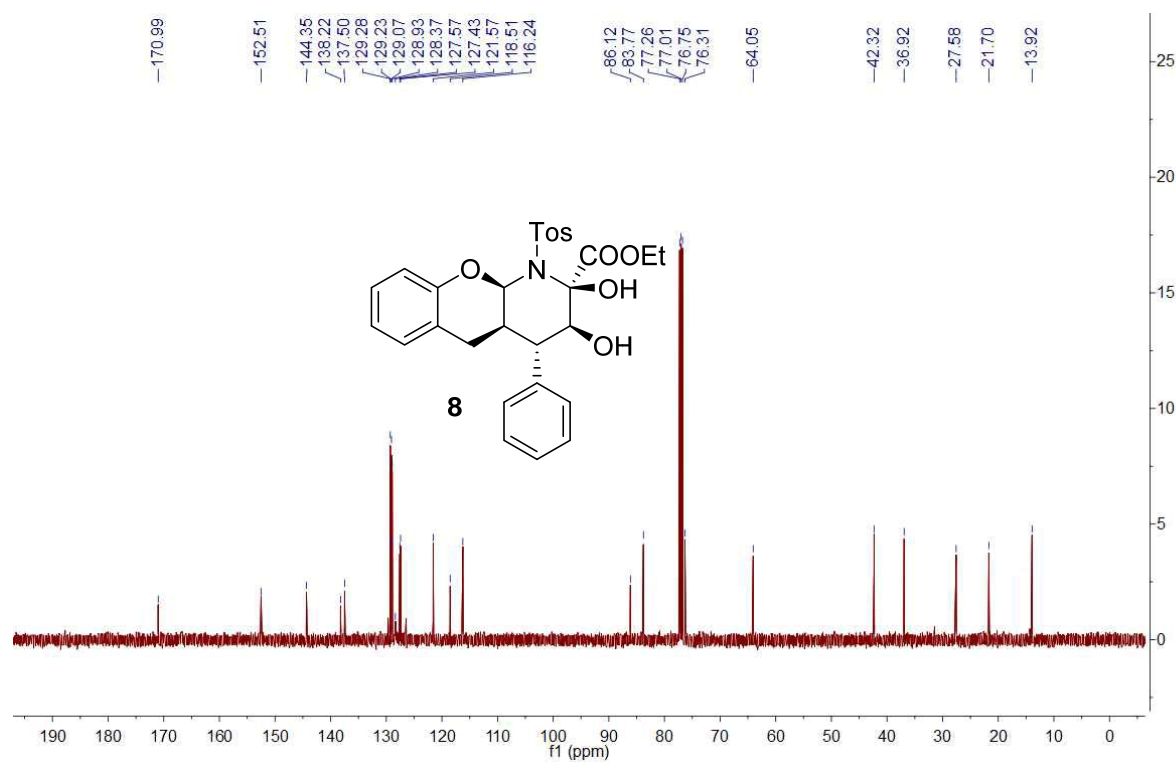

CDCl<sub>3</sub>-NOESY-9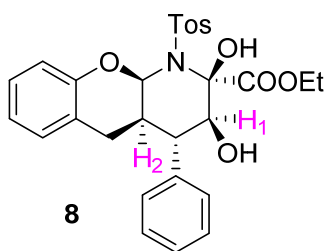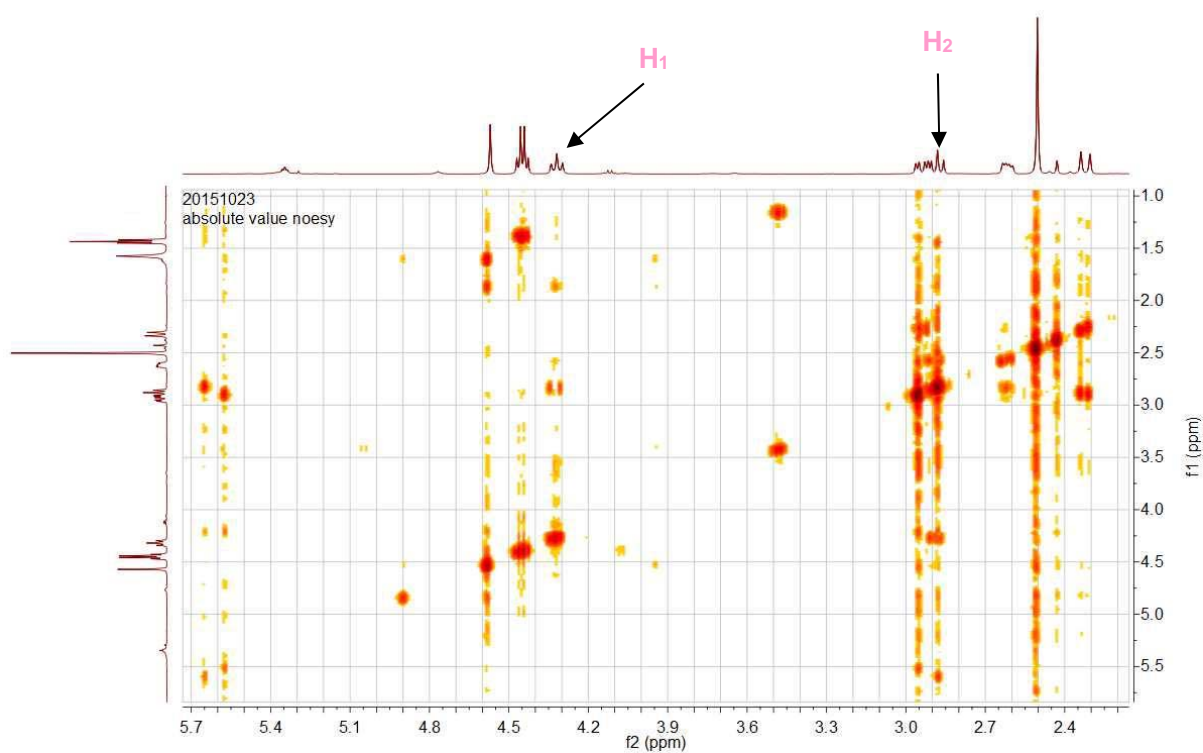

Chrom Type: Fixed WL Chromatogram, 231 nm

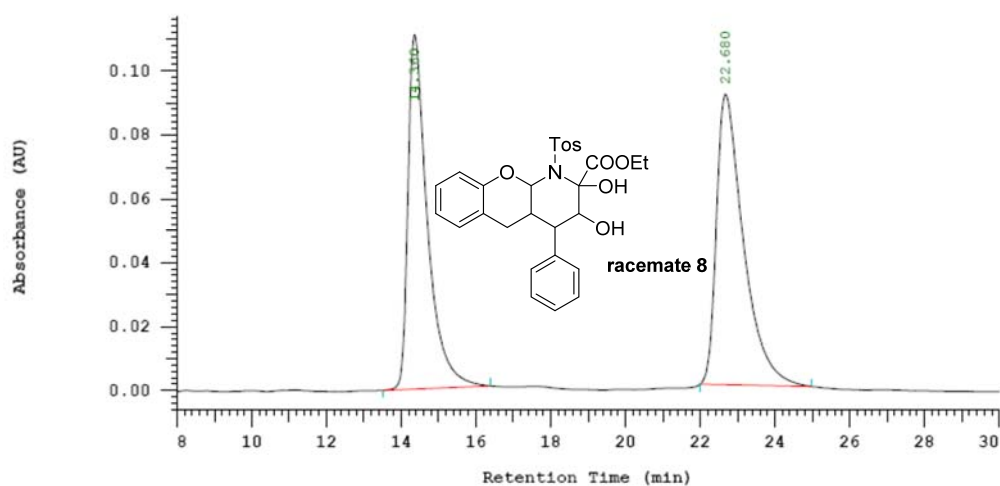

Chrom Type: Fixed WL Chromatogram, 231 nm

Peak Quantitation: AREA

Calculation Method: AREA%

| No. | RT     | Area    | Area %  | BC |
|-----|--------|---------|---------|----|
| 1   | 14.360 | 1994165 | 46.575  | BB |
| 2   | 22.680 | 2287447 | 53.425  | BB |
|     |        | 4281612 | 100.000 |    |

Chrom Type: Fixed WL Chromatogram, 231 nm

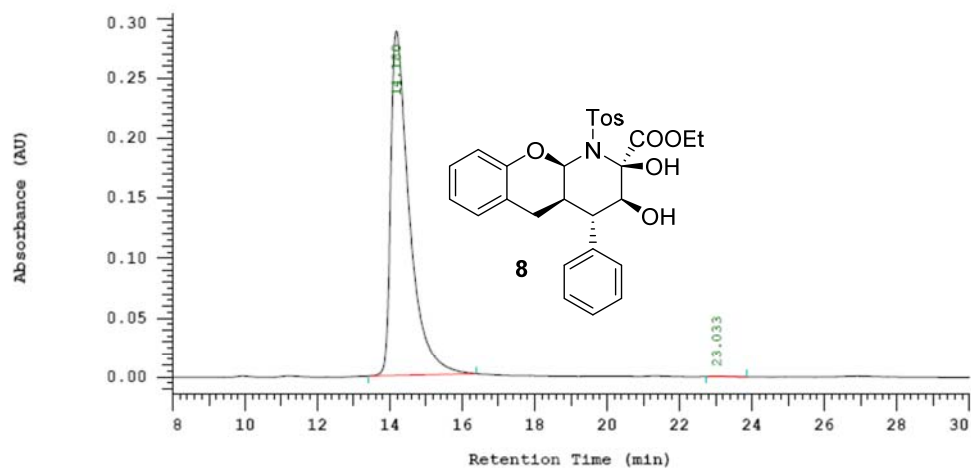

Chrom Type: Fixed WL Chromatogram, 231 nm

Peak Quantitation: AREA

Calculation Method: AREA%

| No. | RT     | Area    | Area %  | BC |
|-----|--------|---------|---------|----|
| 1   | 14.180 | 5173986 | 99.910  | BB |
| 2   | 23.033 | 4666    | 0.090   | BB |
|     |        | 5178652 | 100.000 |    |
